**Hinokitiol alters Gene Expression in *Aspergillus fumigatus*, protects against fungal keratitis by Reducing Fungal Load, LOX-1, Proinflammatory cytokines and Neutrophil Infiltration**

**Co-authors:** Shuqin Ma<sup>1,2</sup>, Hao Lin<sup>1,2</sup>, Xudong Peng<sup>1</sup>, Cui Li<sup>1</sup>, Qian Wang<sup>1</sup>, Qiang Xu<sup>1</sup>, Mengting He<sup>1,2</sup>, Dan Shao<sup>2</sup>, Xing Liu<sup>1,2</sup>, Guiqiu Zhao<sup>1\*</sup>, Jing Lin<sup>1\*</sup>

**Affiliation:**

<sup>1</sup> Department of Ophthalmology, The Affiliated Hospital of Qingdao University, Qingdao, 16 Jiangsu Road, Qingdao 266003, Shandong Province, China.

<sup>2</sup>Qingdao University, 308 Ningxia Road, Qingdao 266003, Shandong Province, China.

Co-first authors: Shuqin Ma and Hao Lin

**Co-correspondence authors:** Jing Lin and Guiqiu Zhao

Jing Lin, [linjing\\_yk@126.com](mailto:linjing_yk@126.com);

Guiqiu Zhao, [zhaoguiqiu\\_good@126.com](mailto:zhaoguiqiu_good@126.com)

**Keywords:** Hinokitiol, *Aspergillus fumigatus*, RNA sequencing, fungal keratitis, inflammation

## Abstract

Hinokitiol (HK), a tropolone-related compound found in cupressaceous plants, has antifungal and anti-inflammatory properties. But its roles in *Aspergillus fumigatus* (*A.F.*) keratitis remains unknown. This study examined the antifungal activity of HK against *A.F.* and investigated its possible mechanisms at the ultrastructural and transcriptional levels. We tested the minimum inhibitory concentration (MIC) of HK against *A.F.*. Our data showed that the MIC<sub>50</sub> was 2 µg/ml and MIC<sub>90</sub> was 8 µg/ml, and HK could significantly inhibit the spore germination and mycelial growth of *A.F.*. Scanning electron microscopy (SEM) and transmission electron microscopy (TEM) observations showed that HK induced significant changes in hyphal morphology and microstructure, including cell membrane rupture and intracellular structural disorder. Adhesion assay and biofilm assay experiments showed that HK reduced the adhesion of spores to human corneal epithelial cells (HCECs) and inhibited the formation of biofilms. The genetic changes of *A.F.* after HK treatment were analyzed by RNA sequencing, and a total of 2487 differentially expressed genes (DEGs) were identified, including the down-regulated DEGs related to carbohydrate and various amino acid metabolism, ribosome biogenesis, asexual reproduction, and up-regulated DEGs related to steroid biosynthesis through GO and KEGG enrichment analysis. RNA-seq results suggested that HK may play an antifungal effect by destroying the structural integrity of its wall and membrane, inhibiting protein biosynthesis and the growth and reproduction of *A.F.*. 10 µg/ml HK, which had no effect on proliferation and migration of HCECs, was used in the treatment of murine fungal keratitis (FK). We found that HK eyedrop treatment could reduce the severity of FK by reducing corneal fungal burden, neutrophil infiltration, and the expression of LOX-1 and pro-inflammatory factors. HK is expected to be a safe and effective new drug for FK treatment.

## Author summary

FK is a serious common blind-causing eye disease. The current clinical antifungal drugs have the disadvantages of low bioavailability and high corneal toxicity, which greatly limit the clinical effectiveness. Therefore, there is an urgent need for a new, safe and effective treatment for FK. HK had shown great antifungal capacity against *A.F.*, amazingly well anti-inflammatory effect and real improvement in murine FK in our research. These findings provide a theoretical basis for the application of HK as an antifungal drug and reveal the potential of HK to be applied in the clinical treatment of FK.

## Introduction

FK is a serious infectious eye disease that can cause permanent vision loss. *A.F.* and *Fusarium* are common pathogenic fungi for FK in developing countries(1). The increase in plant-related ocular trauma, rational use of contact lenses, and irregular use of glucocorticoids all contributed to the increasing incidence (2-4). However, currently commonly used antifungal drugs such as natamycin and voriconazole eyedrops have shortcomings such as poor local penetration of the cornea, strong irritation, and high toxicity, and have obvious limitations in clinical application(4, 5). Therefore, it is of great significance to develop new safe and non-toxic antifungal treatment.

HK, also known as  $\beta$ -thujaplicin, is a natural tropone-related compound purified from cupressaceous plants(6). HK has a wide range of biochemical and pharmacological activities, and has been widely used in toothpaste and oral care gels with low cytotoxicity (7-10). Previous studies have shown that HK has a well antifungal effect, and inhibit the hyphal growth of *Candida albicans* (*C. albicans*) by blocking RAS signaling(11, 12). HK inhibits *Candida* biofilm formation at concentrations of 3.1-12.5  $\mu\text{g/ml}$  and decreases mature biofilms between 12.5-400  $\mu\text{g/ml}$  (12). Studies have also shown that HK has significant anti-inflammatory effects. In HCECs stimulated by polyinosinic acid, HK can inhibit the nucleus translocation of NF- $\kappa$ B and downregulate the expression of pro-inflammatory factors, protecting the cells from damages(13). In middle cerebral artery occlusion-induced thromboembolic stroke rats, HK can provide neuroprotection by inhibiting inflammatory responses and apoptosis (14).

The transcriptome is the collection of all transcripts produced by a species or a specific cell type(15). Transcriptome studies can study gene function and structure at the overall level, revealing specific biological processes and molecular mechanisms (16). Pan et al. revealed the molecular mechanism by which perillaldehyde induces cell death in *Aspergillus flavus* by inhibiting energy metabolism through transcriptome sequencing analysis (17). Tripathi et al. found that Puupehenone enhances the antifungal ability of antifungal drugs by disrupting Hsp90 activity and cell wall integrity pathways by transcriptome analysis(18). However, the effect of HK on the transcriptional profile of *A.F.* and the molecular mechanism remains unclear.

*A.F.* induces an innate immune response in FK (5). Pattern recognition receptors (PRRs) specifically recognize pathogen-associated molecular patterns (PAMPs) on fungal cell walls, activating signaling cascades consisting of neutrophils, macrophages, inflammatory factors, and chemokines(19). However, an excessive inflammatory response leads to the accumulation of large numbers of immune cells and cytotoxic substances, exacerbating tissue damages or delaying wound healing (20, 21). Inhibiting fungal burden and controlling excessive inflammation are considered as effective strategies to improve clinical outcomes of fungal infectious diseases. LOX-1, a lectin-like 52-kD type II low-density lipoprotein oxidizing membrane receptor, plays a pro-inflammatory role in FK in our recent studies(22, 23).

However, whether HK can exert anti-inflammatory and antifungal effects in FK and its possible mechanisms are still unclear. In this experiment, the effect of HK on *A.F.* was preliminarily verified in vitro, and its possible antifungal mechanism was studied at the microstructure and transcriptome levels. We also demonstrated the antifungal and anti-inflammatory effects of HK on the murine FK model and explored the underlying mechanisms. This study provides a new idea for clinical treatment of FK.

## Results

### HK inhibited the growth of *A.F.*

To determine the antifungal effect of HK, we performed MIC experiments on *A.F.*. The MIC data showed that HK inhibited the germination of *A.F.* spores and hyphae from 2 µg/ml, and inhibited 90% of the spore germination at 8 µg/ml (Fig. 1A, B). Time-kill test was used to evaluate the stability of HK against *A.F.*. Compared with the solvent control group, the absorbance value of the 2 µg/ml HK treatment group decreased significantly, and gradually decreased with the increase of concentration (Fig. 1C). When HK concentration was 8 µg/ml, the absorbance was close to 0, and the value did not increase with time extension within 96 hours, indicating that HK concentration of 8 µg/ml had a stable fungicidal effect on *A.F.*. In addition, *A.F.* was incubated with 0, 2, 4, 8 and 16 µg/ml HK or 0.1% DMSO and stained with Calcofluor white stain. Calcofluor white stain can bind to chitin in the fungal cell wall, giving it a bright blue color under fluorescent excitation. The results showed that with the increase of HK concentration, the number of *A.F.* hyphae decreased, the branches decreased, and the length shortened (Fig. 1D-I). With incubated with 16 µg/ml HK, *A.F.* hyphae and spores were not observed in the field (Fig. 1I).

### HK inhibited *A.F.* through multiple mechanisms

We further explored the mechanism that how HK inhibited fungal growth using electron microscopy observations. The SEM results showed that the surface of *A.F.* in 0.1% DMSO medium was regular, uniform, smooth, without cracks, and in a normal growth state (Fig. 2A, B), while HK-treated hyphae had rough, distorted surfaces, forming pits and holes (Fig. 2C, D). PI staining was performed on hyphae to detect the effect of HK on the cell membrane permeability, which is not taken up by normal cells, but the cells whose membrane is disrupted. The fluorescence intensity increased with the increase of HK concentration, indicating that the effect of HK on fungal membrane permeability was dose-dependent (Fig. 2E, F, G). We used TEM to reveal the ultrastructural changes of the organism in response to HK. The control group was a typical ultrastructure of *A.F.*, with complete cell wall, membrane, distributed cytoplasm, regular nucleus, and the mitochondria were clearly visible, when other organelles were arranged in an order (Fig. 2H, I). However, the hyphal structures exposed to HK were highly deformed, with indistinct cell walls, discontinuous cell membranes, and disorganized internal structures. Their damaged cell membrane was completely separated from the cell wall, some organelles were missing, with few mitochondria remained (Fig. 2J, K).

We also examined the effect about different concentrations of HK on fungal biofilm formation and the adhesion ability of spores. 4 µg/ml HK had a significant inhibitory effect on biofilm (Fig. 2L). The absorbance value decreased in a concentration-dependent manner. We tested the adhesion ability by counting the number of spores adhered to each HCEC. The number in HK group (8 µg/ml, Fig. 2N) was significantly reduced compared with the DMSO group (Fig. 2M). (Fig. 2O)

### RNA-Seq analysis

In order to explore the molecular mechanism of antifungal effect, samples from HK treatment group (Test group) and control group (Con group) with 36h incubation were tested by RNA-seq analysis. Table 1 shows all raw data and output statistics. The CleanBases of each library were above 6.1GB. In raw readings, the percent Q30 was over 94% in each group and the mapping percentage for each library was over 97%. The sequencing data was suitable for further biological

analysis. 2487 DEGs were identified in the Test group, with 943 up-regulated genes and 1,544 down-regulated genes (Fig. 3A). Fig 3B showed the volcano plot analysis of all DEGs, and the DEGs we obtained have great difference and significance. To obtain a global view of gene expression profiles after exposure to HK, we clustered the differential genes to a heatmap (Fig. 3B), which represented the transcript levels of all DEGs between the two groups. The results showed that in the Test group, most of the DEGs exhibited significantly reduced expression patterns (blue bands), while in the Con group, most genes exhibited an up-regulated pattern (red bands). The three samples belonging to the Con group (Con1, Con2, and Con3) have similar expression patterns, as well as the three samples belonging to the Test group (Test1, Test2, and Test3), which proves that both the Con and Test groups have great sample repeatability.

GO enrichment analysis was performed on DEGs with adjusted P value < 0.05, and their functions were described in combination with GO annotation results. All identified DEGs were classified into 64 subgroups (Fig. 4A). Among them, 23 subgroups belonged to biological process, 20 subgroups belonged to cellular component, and 21 subgroups belonged to molecular function. Cellular process, metabolic process and single-organism process were significantly distinct subcategories between Con and Test samples. In addition, there were certain DEGs mapped to localization, establishment of localization, cellular component organization or biogenesis, biological regulation and response to stimulus. In the cellular component, cell, cell part, organelle, organelle part, membrane, membrane part were the most significant enriched clusters. DEGs related to molecular function were mainly involved in the catalytic activity, binding and transporter activity subgroups (Fig. 4A).

Based on the KEGG pathway database, we aligned the identified DEGs with specific biochemical pathways. The results showed that these genes were mainly identified in carbohydrate metabolism, amino acid metabolism, genetic information processing-translation, lipid metabolism, genetic folding, sorting and degradation (Fig. 4B). KEGG enrichment analysis TOP20 pathways were mostly identified as ribosome and steroid biosynthesis (Fig. 5A). Among them, ribosome mainly showed a decrease, and steroid biosynthesis mainly showed an increase (Fig. 5B, C).

### **Validation of RNA-Seq**

To verify the expression of RNA-seq genes, we picked 9 genes with different functions based on KEGG pathway analysis for qRT-PCR analysis. As shown in Figs 6A-6I, 8 selected genes were down-regulated and 1 was up-regulated. Although degree of change between each gene detected by qRT-PCR and RNA-Seq was different, the expression patterns of selected DEGs were very similar and showed a high correlation ( $R^2=0.897$ ) (Fig. 6J). These data suggested that RNA-seq analysis was reliable and accurate, and DEGs that may be involved in HK's antifungal activity were shown in Table 2.

### **In vitro and in vivo toxicity evaluation of HK**

In vitro, HCECs were incubated with different concentrations of HK solution. CCK-8 experiment showed that HK was not toxic to HCECs in the concentration range of 2-12  $\mu\text{g/ml}$  (Fig. 7A), of which 2  $\mu\text{g/ml}$  and 4  $\mu\text{g/ml}$  had the ability to promote proliferation. While the concentration of more than 12 $\mu\text{g/ml}$  HK solution reduced the proliferation ability of HCECs. In addition, wound healing showed that HK at 4-12  $\mu\text{g/ml}$  did not affect migration ability of HCECs within 12 hours compared with the control group, while over 12  $\mu\text{g/ml}$  HK reduced migration ability (Fig. 7B, C). In vivo, toxicity of HK was assessed using the Draize test by sodium

fluorescein staining. No fluorescein sodium staining was seen in mouse corneas treated with DMSO or 10, 16 and 32  $\mu\text{g/ml}$  HK for 1 day, 3 days and 5 days (Fig. 7B).

### **HK eased murine FK**

The effect of HK on FK was examined by slit-lamp photography and clinical score(24). Slit-lamp images showed that the HK-treated group had less corneal opacity, reduced ulcer area, and a lower clinical score on day 3 post-infection compared with the DMSO-treated cornea (Fig. 8A, B). The fungal burden was measured by fungal plate count. Compared to the DMSO-treated group, HK treatment reduced the number of viable fungal colonies in infected corneas (Fig. 8C, D).

HE staining of corneal tissue showed that on the 3rd day after infection, a large number of inflammatory cells were infiltrated in the corneal epithelial layer and stromal layer of the control group. While in HK group, the number of inflammatory cells was significantly reduced (Fig 8E). The localization and quantification of neutrophils in infected corneas were assessed by IFS and MPO assay. There were no neutrophils in the corneal stroma of normal mice, while the fluorescence of neutrophils increased in infected corneas. The fluorescence of neutrophils in HK group was significantly less than that in DMSO group (Fig. 8F). Similarly, the MPO level of the HK group was significantly decreased on the 3rd day after infection compared with the DMSO group (Fig. 8G).

To explore the anti-inflammatory mechanism of HK in murine FK, we detected the mRNA and protein expressions of LOX-1 and pro-inflammatory factors in infected corneal tissue. Compared with the control group, HK significantly inhibited *A.F.*-induced LOX-1 expression both at the mRNA level (Fig. 9A) and protein level (Fig. 9B, C). In addition, the mRNA levels of pro-inflammatory factors IL-1 $\beta$ , IL-6 and TNF- $\alpha$  in HK group were significantly lower than those in control group on 3rd day (Fig 9D, 9E, 9F). ELISA results showed that HK could significantly inhibit the protein expression levels of IL-1 $\beta$ , IL-6 and TNF- $\alpha$  (Fig 9G, 9H, 9I).

## Discussion

FK is a highly blinding infectious eye disease caused by fungal infections(25). After the fungus invades the corneal tissue, it causes an uncontrollable excessive inflammatory response, resulting in severe corneal injury, hyphema, and even corneal perforation(3, 26, 27).HK is a natural component found in *Chamaecyparis taiwanensis*, which has been found to have outstanding antifungal and anti-inflammatory effects(28). In the present study, we found that HK could not only effectively inhibit the growth of *A.F.*, but also reduce the inflammatory response of keratitis.

In vitro, HK inhibited the growth of *A.F.* in a concentration-dependent manner and significantly inhibited the growth of *A.F.* at 8  $\mu\text{g}/\text{ml}$ . Our result is similar to the recent study showing the growth inhibitory effect of HK on *C. albicans* at 5  $\mu\text{g}/\text{ml}$ (11). SEM results showed that "pits" and "holes" which can result in cell wall and cell membrane rupture, were formed on the surface of HK-treated *A.F.* cells. In PI staining experiment, we found that the permeability of *A.F.* membrane was increased after HK treatment. Studies have shown that microorganisms can die due to damage to cell walls and membranes(29). The treated cells exhibited complete separation of the cell membrane from their wall, disorganized internal structure of the cell, and loss of some organelles. It is the first time to ultrastructurally identify the antifungal mechanism of HK. In addition to mycelium growth, adhesive force to corneal cells and biofilm formation of fungi are also important steps in infection(30). Biofilms are composed of polysaccharides, melanin, proteins and extracellular DNA and biofilm formation is critical step in fungal infection of host cells and resistance to the host immune system (31, 32). Our study confirmed that HK could inhibit *A.F.* adhesion and biofilm formation. Consistently, Kim et al. found that HK effectively inhibited the production of *C. albicans* biofilms. (12) These results suggest that HK can inhibit the adhesion ability and the biofilm formation of *A.F.*, thus reducing corneal fungal infection.

In order to explore the transcriptome changes of *A.F.* after treated with HK, GO and KEGG enrichment analysis was used after sequencing the transcriptomes. As essential components of the cytoskeleton, the expression of metabolism-related genes of carbohydrates and various amino acids was reduced, while the expression of lipid metabolism-related genes was increased, suggested that the cell cycle was disturbed by HK(33). It is known that starch metabolism and sucrose metabolism are involved in cell wall integrity.(34) Glucan 1,3- $\beta$ -glucosidase catalyzes the hydrolysis of glucan, one of the main components of fungal cell walls.(35) Endo- $\beta$ -1,4-glucanases and  $\beta$ -glucosidases are involved in the bio-degradation of cellulose, a major structural polymer in fungal wall(36). Sequencing results showed that HK treatment up-regulated the expression of glucan and cellulose hydrolysis-related enzymes (Table 2), suggested that HK may disrupt cell wall structure by inducing the gene expression of hydrolase and further increasing the sensitivity of fungal cells to HK(37).The expression levels of DEGs, related to membrane homeostasis-related pathways, such as glycerophospholipid metabolism and steroid biosynthesis, were significantly up-regulated after HK treatment (Table 2)(38). Phospholipases A and D are enzymes that catalyze the decomposition of phospholipids, the main components of cell membranes. After HK treatment, genes of phospholipases A and D were activated, suggested that HK may disrupt membrane integrity by altering membrane -related genes.

Furthermore, HK treatment down-regulated most of the DEGs associated with ribosome biogenesis of *A.F.* (Table 2). As the site of making protein, ribosome biogenesis is a complex

process closely related to growth rate.(39) It has been shown that impaired ribosome disrupts the integration between morphogenesis and nucleus replication during fungal germination,(40) which is consistent with the morphological changes of hyphae after HK exposure observed by electron microscopy in our research. It was observed that genes related to genetic information processing-translation mainly decreased after HK treatment, suggesting that HK may exert its antifungal effect by inhibiting ribosome biosynthesis and subsequent protein biosynthesis. Interestingly, we found that from the genomic data genes related to *A.F.* asexual reproduction were down-regulated in HK group (Table 2). This was consistent with our qRT-PCR results that *abaA*, *wetA* and *brlA* were down-regulated after HK treatment. *AbaA*, *wetA* and *brlA*, their sequential activation is required during fungal asexual reproduction(41). Deletion of *wetA* leads to delayed germ-tube formation from conidia, and reduced density of hyphal branching and thallic(42). This change was also observed after treatment with different concentration HK, indicating the antifungal effect caused by the inhibiting of growth and reproduction of *A.F.*.

HK significantly relieved the corneal damage in our study, in which the antifungal effect of HK was first actually proven in murine fungal keratitis. Neutrophil is important immune cells in the pathogenesis of fungal keratitis(43), however excessive neutrophil infiltration with a large collection of active oxygen, free radical and lysosomal enzymes, often leads to severe damage to corneal tissue (44-46). HK treatment significantly reduced MPO levels and the depth of neutrophil infiltration in murine fungal keratitis corneas. Previous studies have found that in *Streptococcus pneumoniae* pneumonia, HK can lighten the inflammatory damage by reducing the infiltration of neutrophils and the expression level of inflammatory factors in the lung(47). The above results suggest that HK can play an anti-inflammatory role by inhibiting the neutrophil trafficking during inflammation.

Lee et al. found that HK could down-regulate the inflammatory response mediated by LPS through inhibiting the expression level of TNF- $\alpha$  and IL-6 in primary human keratinocytes(48). Our data indicated that HK also significantly down-regulated the mRNA and protein levels of corneal pro-inflammatory cytokines TNF- $\alpha$ , IL-6, and IL-1 $\beta$ , which could mediate the recruitment, activation and adhesion of neutrophils(49). A plentiful supply of virulence factors produced by the inflammatory cascade can damage the corneal epithelium and corneal stromal structure(50, 51). Lu et al. found that HK effectively prevented liver injury after hemorrhagic shock and resuscitation (HS/R) by inhibiting the inflammatory response(52), which is consistent with our findings. Our experiment also found that HK inhibited the expression of LOX-1 induced by *A.F.*. Previous studies have shown that LOX-1 is an important pattern recognition receptor involved in corneal antifungal immune responses(22). Inhibition of LOX-1 results in the lower intracellular ROS production, p38-MAPK dephosphorylation, NF- $\kappa$ B translocation and aberrant Bcl-2 expression, and down-regulate inflammation together(53). All results suggested that the down-regulated inflammatory response was associated with the decreased LOX-1 signaling.

In summary, we found that HK can exert antifungal effects by inhibiting the growth, adhesion, and biofilm formation of *A.F.*, as well as inducing fungal morphological changes, increasing the permeability of fungal membranes, and destroying the intracellular structure. HK interfered with the cell cycle at the transcriptional level, affecting cytoskeleton and ribosome synthesis. In addition, HK exerted a protective effect in *A.F.* keratitis, and its mechanism is related to that HK reduced corneal fungal burden, inhibited the expression of LOX-1 and



pro-inflammatory factors, and reduced neutrophil infiltration.

Our work uncovered a novel, remarkably powerful role for HK against *A.F.* and murine inflammatory response, suggesting HK has the potential to become a new treatment for FK. Future work will validate the signaling targets of HK in more fungal pathogens and explore whether the fungistatic activity it possesses can be clinically adapted. In time, this may hold promise for the development of HK as antifungal agents in fungus-causing ocular inflammation.

## **Materials and Methods**

### **HK Solution Preparation**

HK powder (CAS 499-44-5), purchased from Sigma-Aldrich (Shanghai, China), was dissolved in DMSO to a storage concentration of 32 mg/ml, and diluted to suitable working solutions to achieve various final concentrations.

### ***A.F.* culture**

The standard *A.F.* strain (CPCC 3.0772), purchased from China General Microbiological Culture Collection Center, was cultivated on sabouraud agar medium for 2-3 days, and then conidia on the surface of the medium were gathered. Adjust the final concentration of  $1 \times 10^7$  CFU/ml in PBS with a hemocytometer.

### **MIC for *A.F.* Conidia**

MIC for *A.F.* conidia of HK was assayed by a standardized microdilution method in the 96-well plate described as before(54). *A.F.* conidia were prepared as described above. 32  $\mu$ g/ml of HK in sabouraud medium was diluted to 6 different concentrations by two-fold gradient dilution, then transferred into third to eighth column wells (100  $\mu$ L per well). The first column was the blank control, the second column was incubated with sabouraud medium with 0.1% DMSO. Finally, 5  $\mu$ L prepared conidia suspension ( $1 \times 10^7$  CFU/ml) was added into the 96-well plate. The plates were incubated at 28°C without shaking for 36 hours. *A.F.* conidia MIC was determined spectrophotometrically at 620 nm. Then, the supernatant in 96-well plates were discarded, and 50  $\mu$ l of Calcofluor White Stain (Sigma-Aldrich, Shanghai, China) was added for 10 min at room temperature. The staining pictures were photographed using the fluorescence microscope (Nikon, Tokyo, Japan, 100 $\times$ ).

### **MIC for *A.F.* Hyphae**

Conidia suspension ( $5 \times 10^5$  CFU/ml) was incubated in 96-well plates (100  $\mu$ L per well) at 28 °C for 24 hours to form hyphae, then 0.1% DMSO was added with 2, 4, 8, 12, 16 and 32  $\mu$ g/ml HK per well and incubated for 24 hours. *A.F.* hyphae MIC was determined spectrophotometrically at 620 nm.

### **Time Kill Assay**

Based on the MIC for *A.F.* conidia, the preparation of the microbial inoculum was carried out by the standardized microdilution method as described above. The absorbance at 24 hours, 48 hours, 72 hours and 96 hours was measured. The absorbance at 620 nm of each well represented the amount of precipitation in every well.

### **SEM**

*A.F.* conidia ( $1 \times 10^7$  CFU/ml) was cultured in 6-well plates (1 ml per well) at 28°C for 24 hours to form hyphae. Then, the hyphae were washed, centrifuged (12,000 rpm, 10 minutes), and transferred to a new 6-well plate, followed by incubation with 0.1% DMSO or 2  $\mu$ g/ml HK for 24 hours at 28°C. After PBS rinsing was performed three times, the hyphae were collected, fixed by 2.5% glutaraldehyde at 4°C for two hours. The samples were washed with PBS, then mixed with 1% (v/v) osmium tetroxide in PBS at 4°C for one hour. Subsequently, samples were gently dehydrated in graded ethanol, criticalpoint dried in CO<sub>2</sub>, coated with gold, and observed under SEM (VEGA3; TESCAN Company, Shanghai, China) at magnification  $\times 2000$  and  $\times 5000$  (bar = 20 or 10  $\mu$ m).

### **Propidium Iodide (PI) Uptake Testing**

The conidia suspension of *A.F.* ( $1 \times 10^7$  CFU/ml) was seeded into 12-well plates and incubated at 28°C for 24 hours to form hyphae. Then the hyphae were washed, centrifuged (12,000 rpm, 10 minutes), and transferred to a new 12-well plate, followed by incubation with 0.1% DMSO or HK (2, 4  $\mu$ g/ml) for 24 hours at 28°C. After rinsing with PBS, 1 ml 50  $\mu$ g/ml PI solution (Leagene biotechnology, Beijing, China) was added to each well for 15 minutes' incubation at room temperature in the dark. Images were captured with a fluorescence microscope (Nikon, Tokyo, Japan, 100 $\times$ ) under green excitation light.

### **TEM**

The *A.F.* conidia ( $1 \times 10^7$  CFU/ml) was seeded into 6-well plates and incubated at 28°C for 24 hours to form hyphae. Then the hyphae were washed, centrifuged (12,000 rpm, 10 minutes), and transferred to a new 6-well plate, followed by incubation with 0.1% DMSO or HK (4  $\mu$ g/ml) for 24 hours at 28°C. After rinsing with PBS, the hyphae were collected, fixed by 2.5% glutaraldehyde at 4°C overnight. Experimental procedures for preparation of hyphae sample observed by TEM were performed according to routine methods(55). The samples were then observed in the JEOL-1200EX transmission electron microscope (JEOL Ltd., Tokyo, Japan).

### **Biofilm Assay**

Crystal violet assay was used to determine the biofilm forming capacity(56). Briefly, the preparation of the microbial inoculum before the biofilm formation was carried out by the standardized microdilution method as described on the MIC for *A.F.* conidia. After 48 hours incubation, biofilms were rinsed for 3 times, dried in air and fixed with 99% methanol for 20 minutes, and then stained with 0.1% crystal violet (Sigma-Aldrich, Shanghai, China) for 15 minutes. PBS washed out unbound dyes until the eluent is colorless. After air drying, 100  $\mu$  L 95% ethanol was added to each well at room temperature for 30 minutes to fully release the dye combined with the biofilms. The supernatant was transferred to a new 96-well plate and the OD value of each well was measured at 570 nm three times.

### **Fungal Adherence Assay**

Conidia suspension ( $2 \times 10^5$  CFU/ml) containing 0.1%DMSO or HK (8  $\mu$ g/ml) was mixed with HCECs (provided by Laboratory, University of Xiamen, Fujian, China) ( $2 \times 10^4$ /ml) and plated on the chambered slides (4/slide) as described previously(26). Each slide was incubated at 37°C for 3 hours, then washed with sterile PBS and stained by hematoxylin and eosin (HE) staining. The spores adhering to HCECs were observed and photographed by an optical microscopy (Nikon, Tokyo, Japan, 400 $\times$ ).

### **Sample Preparation for RNA-Seq**

Conidia suspension ( $2 \times 10^5$  CFU/ml) containing 0.1%DMSO or HK (2  $\mu$ g / ml) was inoculated on a 6-well plate at 28 °C. The Con (DMSO treated) and Test (HK treated) samples were harvested after incubation for 36 hours, and then stored at 80 °C for RNA-Seq analysis. All experiments were carried out in 3 independent biological replicates.

### **RNA Isolation and Library Preparation**

Total RNA was extracted using the TRIzol reagent according to the manufacturer's protocol. RNA purity and quantification were evaluated using the NanoDrop 2000 spectrophotometer (Thermo Scientific, USA). RNA integrity was assessed using the Agilent 2100 Bioanalyzer (Agilent Technologies, Santa Clara, CA, USA). Then the libraries were constructed using TruSeq Stranded mRNA LT Sample Prep Kit (Illumina, San Diego, CA, USA) according to the

manufacturer's instructions. The transcriptome sequencing and analysis were conducted by OE Biotech Co., Ltd. (Shanghai, China).

### **RNA-Seq and DEGs Analysis**

The libraries were sequenced on an Illumina HiSeq X Ten platform and 150 bp paired-end reads were generated. Raw reads for each sample were generated. Raw data (raw reads) of fastq format were firstly processed using Trimmomatic and the low-quality reads were removed to obtain the clean reads(57). Then clean reads for each sample were retained for subsequent analyses.

The clean reads were mapped to the *A.F.* genome (NCBI\_ASM265v1) using HISAT2(58). FPKM of each gene was calculated using Cufflinks, and the read counts of each gene were obtained by HTSeq-count(59). Differential expression analysis was performed using the DESeq (2012) R package. P value < 0.05 and foldchange > 2 was set as the threshold for significantly differential expression. Hierarchical cluster analysis of differentially expressed genes (DEGs) was performed to demonstrate the expression pattern of genes in different groups and samples. GO enrichment and KEGG pathway enrichment analysis of DEGs were performed respectively using R based on the hypergeometric distribution(60).

### **Quantitative real-time Polymerase Chain Reaction (qRT-PCR) verification**

To validate the RNA-seq gene expression patterns, nine differentially expressed genes, with a putative function relative to the conidium formation, cell wall formation, were selected to confirm the RNA-Seq data by qRT-PCR. The total RNA was prepared using the Fungal Total RNA Isolation Kit (B518629, Sangon Biotech, Shanghai, China), and reverse transcribed with HiScript III RT SuperMix (Vazyme, Nanjing, China) according to the manufacturer's instructions. The PCR method was based on previous studies(61). Primers used for the qRT-PCR are listed in S1 Table.

### **Cell Viability Assay (CCK-8)**

HCECs were suspended and inoculated in the 96-well plate and treated with HK (0, 2, 4, 8, 10, 12, 14 and 16 µg/ml) or 0.1%DMSO for 24 hours. The cells were incubated for 3 hours with Cell Counting Kit-8 (CCK-8; MCE, New Jersey, America), and the absorbance was measured at 450 nm. Each sample had six replicates.

### **The Draize Test**

The potential adverse effects of HK in normal mouse eyes were tested by ocular toxicology study (Draize Eye Test). HK (10, 16, and 32 µg/ml) in dose of 5 µl was dropped into the conjunctival sac of one eye in four mice. The contralateral eye treated with 0.1%DMSO served as a control. Slit lamp microscopy under cobalt blue light was used to observe the corneal fluorescein staining (CFS) at 1, 3 and 5 days after corneal perfusion in mice(62).

### **Wound healing**

HCECs ( $3 \times 10^5$  / ml) was seeded in a 6-well plate and incubated overnight at 37 °C. Then, three parallel lines were scratched on the cell layer using a 200 µl pipette tip in each well. HCECs was incubated with 0, 4, 8, 12 and 16 µg/ml HK or 0.1%DMSO for 12 hours. The width of cell scratches at the same location was measured at 0 and 12 hours under optical microscope (Nikon, Tokyo, Japan, 100×) to evaluate cell migration. The experiment was repeated at least three times under the same conditions.

### **Murine Models of FK**

Healthy C57BL/6 mice (female, 8 weeks old) were purchased from SPF (Beijing, China) Biotechnology Co., Ltd. All mouse treatments were in accordance with the ARVO Statement for the Use of Animals in Ophthalmic and Visual Research. The Ethics Committee on Experimental Animals approved our experiment and the approved number is: QYFYWZLL26777. Mice were abdominally anesthetized with 8% chloral hydrate. Then 2  $\mu$  L *A.F.* conidia suspension ( $1 \times 10^7$  CFU/ml) was loaded into a sterile microsyringe (10  $\mu$ L; Hamilton Corp., Bonaduz, GR, Switzerland) and inserted obliquely into the midstromal level in the center of the right cornea. The left eyes were blank control.

On the first day after modeling, the eyes in the HK group were treated with 5  $\mu$ l HK eyedrop (10  $\mu$ g/ml), and the eyes in control group were treated with 0.1%DMSO. These treatments were three times per day (once every 4 hours during the daytime). No treatment was given to the normal cornea. Slit lamp photography and clinical score (the standard of clinical scoring referred to Wu et al. was expressed in S2 Table(24)) were taken every day. The corneas of mice were removed by a scalpel and microscissor at the indicated time after treatment for qRT-PCR, Westernblot, myeloperoxidase (MPO), plate count and enzyme-linked immunosorbent assay (ELISA). The whole eyes were taken for immunohistochemical fluorescence staining (IFS) and HE Staining.

#### **Plate Count**

The corneas of DMSO control group and HK treatment group were placed in PBS at 3 days p.i., then ground with a grinding stick and plated on Sabouraud agar mediums in triplicate. The plates were cultured overnight at 28 °C, and the number of visible fungal colonies on the plates was counted (n = 3/group/time) to reflect viable fungi surviving on the cornea(63).

#### **HE Staining**

The eyeballs of mice were harvested at 3 days p.i. (n=3/group/time) and fixed with 4% paraformaldehyde at 4 °C for 3 days. After the lenses were removed, the eyeballs were embedded in paraffin and were filleted into 8  $\mu$  m under a cryostat. The sections were stained with hematoxylin and eosin and photographed under an optical microscope (Nikon, Tokyo, Japan, 400 $\times$ ).

#### **IFS**

The eyeballs of mice were removed at 3 days p.i. (n=3/group/time), embedded in optimal cutting temperature (O.C.T) compound (Sakura Finetek USA, Inc., Torrance, CA, USA), frozen in liquid nitrogen. The 10  $\mu$ m slices were fixed in acetone for 30minutes, then blocked with 10% goat serum (Solarbio, Shanghai, China) at room temperature for 30 minutes. Then these sections were incubated with rat anti-mouse NIMP-R14 antibody (Santa Cruz Biotechnology, Dallas, TX, USA) overnight at 4°C. After being washed with PBS, sections were stained with FITC-conjugated goat anti-rat secondary antibody (1:200; Elabscience) for 1 hour. The cell nuclei were stained with DAPI for 10 minutes. Images were captured by a fluorescence microscope (Nikon, Tokyo, Japan, 400 $\times$ ).

#### **MPO Assay**

Mouse corneas (n = 6/group) were removed at 3 days p.i. and treated following the protocol of MPO kit (Nanjing Jiancheng Bioengineering Institute, Nanjing, China). The corneal tissue homogenate and reagent 3 were mixed at 9:1 and placed in water bath at 37 °C for 15 minutes. Add double distilled water, reagent 4 and chromogenic agent at 37 °C for 30 minutes. Add reagent

7, mix fully, and put it in water bath at 60 °C for 10 minutes. The absorbance was measured immediately at 460 nm.

#### **qRT-PCR on Cornea**

Total RNA from mouse corneas was extracted by the RNAiso plus reagent (TaKaRa, Dalian, China). RNA samples were reverse transcribed using HiScript III RT SuperMix (Vazyme, Nanjing, China) to produce cDNA template. The PCR method was based on previous studies(61). The primer details are listed in S3 Table.

#### **Western Blot**

Six corneas as a sample were lysed in 196 µl RIPA buffer, 2 µl PMSF and 2 µl phosphatase inhibitor for 2 hours. The protein concentration was determined by BCA assay (Solarbio, Beijing, China). The proteins were separated by SDS-PAGE electrophoresis and transferred onto polyvinylidene difluoride membrane (Solarbio). After blocking with blocking solution (Solarbio), the membrane was incubated with GADPH (1:2000; Elabscience, Wuhan, China) and LOX-1 (1:1000; Abcam, Cambridge, MA, USA) at 4 °C. The membrane was washed in PBST for 3 times and then incubated with secondary antibody at 37 °C for 1 h. Then the spots are visualized with ECL Western blot detection reagents (Biotime, China).

#### **ELISA**

Mouse corneas were collected and homogenated. The release levels of IL-1β, TNF-α and IL-6 in the supernatant were detected by mouse ELISA kit (Elabscience). The optical density of each hole was measured immediately at 450nm, and the reference wavelength was 570nm.

#### **Statistical analysis**

*Mann-Whitney U* test was used to analyze the difference of clinical scores between the two groups at each time point. For comparisons with data from control group or HK treatment group, we performed an unpaired, two-tailed Student's *t*-test or one-way *ANOVA* with post hoc analysis. GraphPad Prism 8.0 and ImageJ1.44p were used for statistical analyses, and values presented as the mean ± standard deviation (SD).  $P < 0.05$  (\* $P < 0.05$ , \*\* $P < 0.01$ , \*\*\* $P < 0.001$ ) was considered as statistically significant (ns = no significance). All experiments were repeated at least three times to ensure accuracy.

**Supporting information**

**S1 Table** Primer List Used for *A.F.* qRT-PCR.

**S2 Table** Visual scoring system for murine fungal keratitis.

**S3 Table** Primer List Used for Mouse cornea qRT-PCR.

### **Acknowledgments:**

The content is solely the authors' responsibility and does not necessarily represent the funding organizations' official views.



## REFERENCES:

1. Gu L, Lin J, Wang Q, Li C, Peng X, Fan Y, et al. Dimethyl itaconate protects against fungal keratitis by activating the Nrf2/HO-1 signaling pathway. *Immunol Cell Biol.* 2020;98(3):229-41. Epub 2020/01/17. doi: 10.1111/imcb.12316. PubMed PMID: 31943336; PubMed Central PMCID: PMC7065235.
2. Brown L, Leck AK, Gichangi M, Burton MJ, Denning DW. The global incidence and diagnosis of fungal keratitis. *Lancet Infect Dis.* 2021;21(3):e49-e57. doi: 10.1016/S1473-3099(20)30448-5. PubMed PMID: 33645500.
3. Niu L, Liu X, Ma Z, Yin Y, Sun L, Yang L, et al. Fungal keratitis: Pathogenesis, diagnosis and prevention. *Microb Pathog.* 2020;138:103802. Epub 2019/10/19. doi: 10.1016/j.micpath.2019.103802. PubMed PMID: 31626916.
4. Fan Y, Li C, Peng X, Jiang N, Hu L, Gu L, et al. Perillaldehyde Ameliorates *Aspergillus fumigatus* Keratitis by Activating the Nrf2/HO-1 Signaling Pathway and Inhibiting Dectin-1-Mediated Inflammation. *Invest Ophthalmol Vis Sci.* 2020;61(6):51. Epub 2020/06/25. doi: 10.1167/iops.61.6.51. PubMed PMID: 32579678; PubMed Central PMCID: PMC7415897.
5. van de Veerdonk FL, Gresnigt MS, Romani L, Netea MG, Latge JP. *Aspergillus fumigatus* morphology and dynamic host interactions. *Nat Rev Microbiol.* 2017;15(11):661-74. Epub 2017/09/19. doi: 10.1038/nrmicro.2017.90. PubMed PMID: 28919635.
6. Rebia RA, Binti Sadon NS, Tanaka T. Natural Antibacterial Reagents (Centella, Propolis, and Hinokitiol) Loaded into Poly[(R)-3-hydroxybutyrate-co-(R)-3-hydroxyhexanoate] Composite Nanofibers for Biomedical Applications. *Nanomaterials (Basel).* 2019;9(12). Epub 2019/11/27. doi: 10.3390/nano9121665. PubMed PMID: 31766678; PubMed Central PMCID: PMC6956080.
7. Shih YH, Lin DJ, Chang KW, Hsia SM, Ko SY, Lee SY, et al. Evaluation physical characteristics and comparison antimicrobial and anti-inflammation potentials of dental root canal sealers containing hinokitiol in vitro. *PLoS One.* 2014;9(6):e94941. Epub 2014/06/11. doi: 10.1371/journal.pone.0094941. PubMed PMID: 24915566; PubMed Central PMCID: PMC4051635.
8. Iha K, Suzuki N, Yoneda M, Takeshita T, Hirofuji T. Effect of mouth cleaning with hinokitiol-containing gel on oral malodor: a randomized, open-label pilot study. *Oral Surg Oral Med Oral Pathol Oral Radiol.* 2013;116(4):433-9. Epub 2013/08/24. doi: 10.1016/j.oooo.2013.05.021. PubMed PMID: 23969334.
9. Nagao Y, Sata M. Effect of oral care gel on the quality of life for oral lichen planus in patients with chronic HCV infection. *Virology.* 2011;8:348. Epub 2011/07/14. doi: 10.1186/1743-422X-8-348. PubMed PMID: 21749712; PubMed Central PMCID: PMC3149004.
10. Shih YH, Chang KW, Hsia SM, Yu CC, Fuh LJ, Chi TY, et al. In vitro antimicrobial and anticancer potential of hinokitiol against oral pathogens and oral cancer cell lines. *Microbiol Res.* 2013;168(5):254-62. Epub 2013/01/15. doi: 10.1016/j.micres.2012.12.007. PubMed PMID: 23312825.
11. Komaki N, Watanabe T, Ogasawara A, Sato N, Mikami T, Matsumoto T. Antifungal mechanism of hinokitiol against *Candida albicans*. *Biol Pharm Bull.* 2008;31(4):735-7. Epub 2008/04/02. doi: 10.1248/bpb.31.735. PubMed PMID: 18379073.
12. Kim DJ, Lee MW, Choi JS, Lee SG, Park JY, Kim SW. Inhibitory activity of hinokitiol against biofilm formation in fluconazole-resistant *Candida* species. *PLoS One.* 2017;12(2):e0171244. Epub 2017/02/06. doi: 10.1371/journal.pone.0171244. PubMed PMID: 28152096; PubMed Central PMCID: PMC5289548.
13. Ye J, Xu YF, Lou LX, Jin K, Miao Q, Ye X, et al. Anti-inflammatory effects of hinokitiol on human

- corneal epithelial cells: an in vitro study. *Eye (Lond)*. 2015;29(7):964-71. Epub 2015/05/09. doi: 10.1038/eye.2015.62. PubMed PMID: 25952949; PubMed Central PMCID: PMC4506343.
14. Jayakumar T, Hsu WH, Yen TL, Luo JY, Kuo YC, Fong TH, et al. Hinokitiol, a natural tropolone derivative, offers neuroprotection from thromboembolic stroke in vivo. *Evid Based Complement Alternat Med*. 2013;2013:840487. Epub 2013/11/29. doi: 10.1155/2013/840487. PubMed PMID: 24285977; PubMed Central PMCID: PMC3826376.
15. Adey AC. Integration of Single-Cell Genomics Datasets. *Cell*. 2019;177(7):1677-9. Epub 2019/06/15. doi: 10.1016/j.cell.2019.05.034. PubMed PMID: 31199914.
16. Berka RM, Grigoriev IV, Otilar R, Salamov A, Grimwood J, Reid I, et al. Comparative genomic analysis of the thermophilic biomass-degrading fungi *Myceliophthora thermophila* and *Thielavia terrestris*. *Nat Biotechnol*. 2011;29(10):922-7. Epub 2011/10/04. doi: 10.1038/nbt.1976. PubMed PMID: 21964414.
17. Pan C, Li YX, Yang K, Famous E, Ma Y, He X, et al. The Molecular Mechanism of Perillaldehyde Inducing Cell Death in *Aspergillus flavus* by Inhibiting Energy Metabolism Revealed by Transcriptome Sequencing. *Int J Mol Sci*. 2020;21(4). Epub 2020/02/28. doi: 10.3390/ijms21041518. PubMed PMID: 32102190; PubMed Central PMCID: PMC7073185.
18. Tripathi SK, Feng Q, Liu L, Levin DE, Roy KK, Doerksen RJ, et al. Puupehenone, a Marine-Sponge-Derived Sesquiterpene Quinone, Potentiates the Antifungal Drug Caspofungin by Disrupting Hsp90 Activity and the Cell Wall Integrity Pathway. *mSphere*. 2020;5(1). Epub 2020/01/10. doi: 10.1128/mSphere.00818-19. PubMed PMID: 31915228; PubMed Central PMCID: PMC6952202.
19. Guo Y, Kasahara S, Jhingran A, Tosini NL, Zhai B, Aufiero MA, et al. During *Aspergillus* Infection, Monocyte-Derived DCs, Neutrophils, and Plasmacytoid DCs Enhance Innate Immune Defense through CXCR3-Dependent Crosstalk. *Cell Host Microbe*. 2020;28(1):104-16 e4. Epub 2020/06/03. doi: 10.1016/j.chom.2020.05.002. PubMed PMID: 32485165; PubMed Central PMCID: PMC7263227.
20. Sitkovsky MV, Lukashev D, Apasov S, Kojima H, Koshiba M, Caldwell C, et al. Physiological control of immune response and inflammatory tissue damage by hypoxia-inducible factors and adenosine A2A receptors. *Annu Rev Immunol*. 2004;22:657-82. Epub 2004/03/23. doi: 10.1146/annurev.immunol.22.012703.104731. PubMed PMID: 15032592.
21. Uderhardt S, Martins AJ, Tsang JS, Lammermann T, Germain RN. Resident Macrophages Cloak Tissue Microlesions to Prevent Neutrophil-Driven Inflammatory Damage. *Cell*. 2019;177(3):541-55 e17. Epub 2019/04/09. doi: 10.1016/j.cell.2019.02.028. PubMed PMID: 30955887; PubMed Central PMCID: PMC6474841.
22. Li C, Zhao G, Che C, Lin J, Li N, Hu L, et al. The Role of LOX-1 in Innate Immunity to *Aspergillus fumigatus* in Corneal Epithelial Cells. *Invest Ophthalmol Vis Sci*. 2015;56(6):3593-603. Epub 2015/06/06. doi: 10.1167/iovs.14-15989. PubMed PMID: 26047046.
23. Li C, He K, Yin M, Zhang Q, Lin J, Niu Y, et al. LOX-1 Regulates Neutrophil Apoptosis and Fungal Load in *A. Fumigatus* Keratitis. *Curr Eye Res*. 2021;1-12. Epub 2021/07/16. doi: 10.1080/02713683.2021.1948063. PubMed PMID: 34264144.
24. Wu TG, Wilhelmus KR, Mitchell BM. Experimental keratomycosis in a mouse model. *Invest Ophthalmol Vis Sci*. 2003;44(1):210-6. Epub 2002/12/31. doi: 10.1167/iovs.02-0446. PubMed PMID: 12506077.
25. Klotz SA, Penn CC, Negvesky GJ, Butrus SI. Fungal and parasitic infections of the eye. *Clin Microbiol Rev*. 2000;13(4):662-85. Epub 2000/10/12. doi: 10.1128/CMR.13.4.662. PubMed PMID:

11023963; PubMed Central PMCID: PMC88956.

26. Zhan L, Peng X, Lin J, Zhang Y, Gao H, Zhu Y, et al. Honokiol Reduces Fungal Load, Toll-Like Receptor-2, and Inflammatory Cytokines in *Aspergillus fumigatus* Keratitis. *Invest Ophthalmol Vis Sci*. 2020;61(4):48. Epub 2020/04/30. doi: 10.1167/iov.61.4.48. PubMed PMID: 32347916; PubMed Central PMCID: PMC88956.

27. Mahmoudi S, Masoomi A, Ahmadikia K, Tabatabaei SA, Soleimani M, Rezaie S, et al. Fungal keratitis: An overview of clinical and laboratory aspects. *Mycoses*. 2018;61(12):916-30. Epub 2018/07/12. doi: 10.1111/myc.12822. PubMed PMID: 29992633.

28. Chang KC, Chen WC, Chen CH, Ko CL, Liu SM, Chen JC. Chemical cross-linking on gelatin-hyaluronan loaded with hinokitiol for the preparation of guided tissue regeneration hydrogel membranes with antibacterial and biocompatible properties. *Mater Sci Eng C Mater Biol Appl*. 2021;119:111576. Epub 2020/12/17. doi: 10.1016/j.msec.2020.111576. PubMed PMID: 33321622.

29. Alsammarraie FK, Wang W, Zhou P, Mustapha A, Lin M. Green synthesis of silver nanoparticles using turmeric extracts and investigation of their antibacterial activities. *Colloids Surf B Biointerfaces*. 2018;171:398-405. Epub 2018/08/03. doi: 10.1016/j.colsurfb.2018.07.059. PubMed PMID: 30071481.

30. Sheppard DC. Molecular mechanism of *Aspergillus fumigatus* adherence to host constituents. *Curr Opin Microbiol*. 2011;14(4):375-9. Epub 2011/07/26. doi: 10.1016/j.mib.2011.07.006. PubMed PMID: 21784698; PubMed Central PMCID: PMC3370656.

31. Du Toit A. A resistant niche. *Nat Rev Microbiol*. 2020;18(11):604-5. Epub 2020/09/11. doi: 10.1038/s41579-020-00447-x. PubMed PMID: 32908303.

32. Bjarnsholt T, Ciofu O, Molin S, Givskov M, Hoiby N. Applying insights from biofilm biology to drug development - can a new approach be developed? *Nat Rev Drug Discov*. 2013;12(10):791-808. Epub 2013/10/02. doi: 10.1038/nrd4000. PubMed PMID: 24080700.

33. Zhang YQ, Rao R. Global disruption of cell cycle progression and nutrient response by the antifungal agent amiodarone. *J Biol Chem*. 2007;282(52):37844-53. Epub 2007/11/03. doi: 10.1074/jbc.M707593200. PubMed PMID: 17974566.

34. van Leeuwe TM, Wattjes J, Niehues A, Forn-Cuni G, Geoffrion N, Melida H, et al. A seven-membered cell wall related transglycosylase gene family in *Aspergillus niger* is relevant for cell wall integrity in cell wall mutants with reduced alpha-glucan or galactomannan. *Cell Surf*. 2020;6:100039. Epub 2020/08/04. doi: 10.1016/j.tcs.2020.100039. PubMed PMID: 32743151; PubMed Central PMCID: PMC7389268.

35. Martin K, McDougall BM, McIlroy S, Chen J, Seviour RJ. Biochemistry and molecular biology of exocellular fungal beta-(1,3)- and beta-(1,6)-glucanases. *FEMS Microbiol Rev*. 2007;31(2):168-92. Epub 2007/02/23. doi: 10.1111/j.1574-6976.2006.00055.x. PubMed PMID: 17313520.

36. Luo H, Yang J, Yang P, Li J, Huang H, Shi P, et al. Gene cloning and expression of a new acidic family 7 endo-beta-1,3-1,4-glucanase from the acidophilic fungus *Bispora* sp. MEY-1. *Appl Microbiol Biotechnol*. 2010;85(4):1015-23. Epub 2009/07/11. doi: 10.1007/s00253-009-2119-0. PubMed PMID: 19590866.

37. Meng D, Garba B, Ren Y, Yao M, Xia X, Li M, et al. Antifungal activity of chitosan against *Aspergillus ochraceus* and its possible mechanisms of action. *Int J Biol Macromol*. 2020;158:1063-70. Epub 2020/05/04. doi: 10.1016/j.ijbiomac.2020.04.213. PubMed PMID: 32360472.

38. Zakany F, Pap P, Papp F, Kovacs T, Nagy P, Peter M, et al. Determining the target of membrane sterols on voltage-gated potassium channels. *Biochim Biophys Acta Mol Cell Biol Lipids*. 2019;1864(3):312-25. Epub 2018/12/17. doi: 10.1016/j.bbailip.2018.12.006. PubMed PMID:

30553843.

39. Greber BJ, Ban N. Structure and Function of the Mitochondrial Ribosome. *Annu Rev Biochem.* 2016;85:103-32. Epub 2016/03/30. doi: 10.1146/annurev-biochem-060815-014343. PubMed PMID: 27023846.

40. Bhabhra R, Richie DL, Kim HS, Nierman WC, Fortwendel J, Aris JP, et al. Impaired ribosome biogenesis disrupts the integration between morphogenesis and nuclear duplication during the germination of *Aspergillus fumigatus*. *Eukaryot Cell.* 2008;7(4):575-83. Epub 2008/02/26. doi: 10.1128/EC.00412-07. PubMed PMID: 18296619; PubMed Central PMCID: PMCPMC2292631.

41. Twumasi-Boateng K, Yu Y, Chen D, Gravelat FN, Nierman WC, Sheppard DC. Transcriptional profiling identifies a role for BrIA in the response to nitrogen depletion and for StuA in the regulation of secondary metabolite clusters in *Aspergillus fumigatus*. *Eukaryot Cell.* 2009;8(1):104-15. Epub 2008/11/26. doi: 10.1128/EC.00265-08. PubMed PMID: 19028996; PubMed Central PMCID: PMCPMC2620752.

42. Shin KS, Kim YH, Yu JH. Proteomic analyses reveal the key roles of BrIA and AbaA in biogenesis of gliotoxin in *Aspergillus fumigatus*. *Biochem Biophys Res Commun.* 2015;463(3):428-33. Epub 2015/06/03. doi: 10.1016/j.bbrc.2015.05.090. PubMed PMID: 26032501.

43. Leal SM, Jr., Vareechon C, Cowden S, Cobb BA, Latge JP, Momany M, et al. Fungal antioxidant pathways promote survival against neutrophils during infection. *J Clin Invest.* 2012;122(7):2482-98. Epub 2012/06/19. doi: 10.1172/JCI63239. PubMed PMID: 22706306; PubMed Central PMCID: PMCPMC3534057.

44. Del Fresno C, Saz-Leal P, Enamorado M, Wculek SK, Martinez-Cano S, Blanco-Menendez N, et al. DNGR-1 in dendritic cells limits tissue damage by dampening neutrophil recruitment. *Science.* 2018;362(6412):351-6. Epub 2018/10/20. doi: 10.1126/science.aan8423. PubMed PMID: 30337411.

45. Serhan CN, Brain SD, Buckley CD, Gilroy DW, Haslett C, O'Neill LA, et al. Resolution of inflammation: state of the art, definitions and terms. *FASEB J.* 2007;21(2):325-32. Epub 2007/02/03. doi: 10.1096/fj.06-7227rev. PubMed PMID: 17267386; PubMed Central PMCID: PMCPMC3119634.

46. Gao H, Peng X, Zhan L, Lin J, Zhang Y, Huan Y, et al. The role of Glabridin in antifungal and anti-inflammation effects in *Aspergillus fumigatus* keratitis. *Exp Eye Res.* 2021;214:108883. Epub 2021/12/14. doi: 10.1016/j.exer.2021.108883. PubMed PMID: 34896107.

47. Isono T, Domon H, Nagai K, Maekawa T, Tamura H, Hiyoshi T, et al. Treatment of severe pneumonia by hinokitiol in a murine antimicrobial-resistant pneumococcal pneumonia model. *PLoS One.* 2020;15(10):e0240329. Epub 2020/10/16. doi: 10.1371/journal.pone.0240329. PubMed PMID: 33057343; PubMed Central PMCID: PMCPMC7561173 following competing interests: Dr. Eiji Kunitomo is an employee of Kobayashi Pharmaceutical, Co., Ltd. The funder provided support in the form of salaries for author EK, but did not have any additional role in the study design, data collection and analysis, decision to publish, or preparation of the manuscript. The specific roles of these authors are articulated in the 'author contributions' section.

48. Lee JH, Moon JH, Lee YJ, Park SY. SIRT1, a Class III Histone Deacetylase, Regulates LPS-Induced Inflammation in Human Keratinocytes and Mediates the Anti-Inflammatory Effects of Hinokitiol. *J Invest Dermatol.* 2017;137(6):1257-66. Epub 2017/03/05. doi: 10.1016/j.jid.2016.11.044. PubMed PMID: 28257794.

49. Tian X, Peng X, Lin J, Zhang Y, Zhan L, Yin J, et al. Isorhamnetin Ameliorates *Aspergillus fumigatus* Keratitis by Reducing Fungal Load, Inhibiting Pattern-Recognition Receptors and Inflammatory Cytokines. *Invest Ophthalmol Vis Sci.* 2021;62(3):38. Epub 2021/03/31. doi: 10.1167/iovs.62.3.38.

PubMed PMID: 33783487; PubMed Central PMCID: PMCPMC8010362.

50. Nemeth T, Sperandio M, Mocsai A. Neutrophils as emerging therapeutic targets. *Nat Rev Drug Discov.* 2020;19(4):253-75. Epub 2020/01/24. doi: 10.1038/s41573-019-0054-z. PubMed PMID: 31969717.

51. Lin H, Wang Q, Niu Y, Gu L, Hu L, Li C, et al. Antifungal and Anti-inflammatory Effect of Punicalagin on Murine *Aspergillus fumigatus* Keratitis. *Curr Eye Res.* 2021:1-8. Epub 2021/11/20. doi: 10.1080/02713683.2021.2008982. PubMed PMID: 34797193.

52. Lu WJ, Lin KH, Tseng MF, Yuan KC, Huang HC, Sheu JR, et al. New therapeutic strategy of hinokitiol in haemorrhagic shock-induced liver injury. *J Cell Mol Med.* 2019;23(3):1723-34. Epub 2018/12/15. doi: 10.1111/jcmm.14070. PubMed PMID: 30548082; PubMed Central PMCID: PMCPMC6378182.

53. He K, Yue LH, Zhao GQ, Li C, Lin J, Jiang N, et al. The role of LOX-1 on innate immunity against *Aspergillus* keratitis in mice. *Int J Ophthalmol.* 2016;9(9):1245-50. Epub 2016/09/28. doi: 10.18240/ijo.2016.09.01. PubMed PMID: 27672585; PubMed Central PMCID: PMCPMC5028655.

54. Wootton M, Davies L, Pitman K, Howe RA. Evaluation of susceptibility testing methods for *Burkholderia cepacia* complex: a comparison of broth microdilution, agar dilution, gradient strip and EUCAST disc diffusion. *Clin Microbiol Infect.* 2020. Epub 2020/12/01. doi: 10.1016/j.cmi.2020.11.012. PubMed PMID: 33253940.

55. Shen T, Wang Q, Li C, Zhou B, Li Y, Liu Y. Transcriptome sequencing analysis reveals silver nanoparticles antifungal molecular mechanism of the soil fungi *Fusarium solani* species complex. *J Hazard Mater.* 2020;388:122063. Epub 2020/01/24. doi: 10.1016/j.jhazmat.2020.122063. PubMed PMID: 31972432.

56. Dhale RP, Ghorpade MV, Dharmadhikari CA. Comparison of various methods used to detect biofilm production of *Candida* species. *J Clin Diagn Res.* 2014;8(11):DC18-c20. Epub 2015/01/15. doi: 10.7860/JCDR/2014/10445.5147. PubMed PMID: 25584219; PubMed Central PMCID: PMCPMC4290237.

57. Bolger AM, Lohse M, Usadel B. Trimmomatic: a flexible trimmer for Illumina sequence data. *Bioinformatics.* 2014;30(15):2114-20. Epub 2014/04/04. doi: 10.1093/bioinformatics/btu170. PubMed PMID: 24695404; PubMed Central PMCID: PMCPMC4103590.

58. Kim D, Langmead B, Salzberg SL. HISAT: a fast spliced aligner with low memory requirements. *Nat Methods.* 2015;12(4):357-60. Epub 2015/03/10. doi: 10.1038/nmeth.3317. PubMed PMID: 25751142; PubMed Central PMCID: PMCPMC4655817.

59. Anders S, Pyl PT, Huber W. HTSeq—a Python framework to work with high-throughput sequencing data. *Bioinformatics.* 2015;31(2):166-9. Epub 2014/09/28. doi: 10.1093/bioinformatics/btu638. PubMed PMID: 25260700; PubMed Central PMCID: PMCPMC4287950.

60. Kanehisa M, Araki M, Goto S, Hattori M, Hirakawa M, Itoh M, et al. KEGG for linking genomes to life and the environment. *Nucleic Acids Res.* 2008;36(Database issue):D480-4. Epub 2007/12/14. doi: 10.1093/nar/gkm882. PubMed PMID: 18077471; PubMed Central PMCID: PMCPMC2238879.

61. Sun L, Li X, Ma H, He R, Donkor PO. Global gene expression changes reflecting pleiotropic effects of *Irpex lacteus* induced by low-intensity electromagnetic field. *Bioelectromagnetics.* 2019;40(2):104-17. Epub 2019/02/21. doi: 10.1002/bem.22171. PubMed PMID: 30786058.

62. Zhu Y, Peng X, Zhang Y, Lin J, Zhao G. Baicalein Protects Against *Aspergillus fumigatus* Keratitis by Reducing Fungal Load and Inhibiting TSLP-Induced Inflammatory Response. *Invest Ophthalmol Vis Sci.*

2021;62(6):26. Epub 2021/05/27. doi: 10.1167/iops.62.6.26. PubMed PMID: 34038512; PubMed Central PMCID: PMC8164373.

63. Lin H, Wang Q, Niu Y, Gu L, Hu L, Li C, et al. Antifungal and anti-inflammatory effect of punicalagin on murine *Aspergillus fumigatus* keratitis. *Curr Eye Res*. 2021. Epub 2021/11/20. doi: 10.1080/02713683.2021.2008982. PubMed PMID: 34797193.

**Table 1 All raw data and output statistics of sequencing data.**

| Sample | RawReads | RawBases | CleanReads | CleanBases | ValidBases | Q30    | GC     | Mapped/% |
|--------|----------|----------|------------|------------|------------|--------|--------|----------|
| Con1   | 48.34M   | 7.25G    | 47.54M     | 6.99G      | 96.38%     | 94.63% | 53.15% | 97.53    |
| Con2   | 49.96M   | 7.49G    | 49.47M     | 7.33G      | 97.83%     | 95.94% | 53.49% | 98.23    |
| Con3   | 42.23M   | 6.33G    | 41.78M     | 6.19G      | 97.70%     | 95.80% | 53.44% | 98.09    |
| T1     | 49.44M   | 7.42G    | 48.87M     | 7.25G      | 97.77%     | 95.80% | 53.72% | 98.35    |
| T2     | 43.18M   | 6.48G    | 42.68M     | 6.33G      | 97.74%     | 95.61% | 53.84% | 98.33    |
| T3     | 47.30M   | 7.10G    | 46.48M     | 6.87G      | 96.89%     | 95.05% | 53.81% | 98.10    |

bioRxiv preprint doi: <https://doi.org/10.1101/2022.02.18.480984>; this version posted February 18, 2022. The copyright holder for this preprint (which was not certified by peer review) is the author/funder, who has granted bioRxiv a license to display the preprint in perpetuity. It is made available under a [CC-BY 4.0 International license](#).

**Table 2 DEGs that may be involved in HK antifungal mechanism.**

| Pathway                        | Gene product                                                       | Log2FoldChange |
|--------------------------------|--------------------------------------------------------------------|----------------|
| Starch and sucrose metabolism  | Endoglucanase-5 egl5                                               | 1.44           |
|                                | Beta-glucosidase 1B BGL1B                                          | 1.04           |
|                                | Probable glucan endo-1,3-beta-glucosidase eglC                     | 2.22           |
|                                | Alpha-amylase B                                                    | 1.45           |
|                                | Probable endo-beta-1,4-glucanase B                                 | 2.76           |
|                                | Glucan 1,3-beta-glucosidase                                        | 1.26           |
| Glycerophospholipid metabolism | Phospholipase D zeta 1 K20f9.1                                     | 2.23           |
|                                | Lysophospholipase                                                  | 2.55           |
| Steroid biosynthesis           | phosphonase A2 activity                                            | 1.09           |
|                                | Delta(14)-sterol reductase                                         | 4.38           |
|                                | C-8 sterol isomerase 9G6.010                                       | 1.34           |
|                                | Processed sterol regulatory element-binding protein 1 SPBC19C2.09  | 1.93           |
|                                | Methylsterol monooxygenase                                         | 2.67           |
| ribosome                       | Translation initiation factor RLI1                                 | -2.06          |
|                                | Nucleolar pre-ribosomal-associated protein 2 J1622                 | -1.07          |
|                                | 40S ribosomal protein S20 SPCC576.09                               | -1.78          |
|                                | Cytoplasmic 60S subunit biogenesis factor REI1 homolog CHT_0044240 | -1.01          |
|                                | Ribosome biogenesis protein tsr1 SPAC23H4.15                       | -1.22          |
|                                | Ribosome biogenesis in eukaryotes                                  | -2.47          |
|                                | 40S ribosomal protein S6-B SPAPB1E7.12                             | -1.19          |
|                                | GTP-binding nuclear protein GSP1/Ran CAGL0100594g                  | -1.34          |
|                                | 20S-pre-rRNA D-site endonuclease nob1 SPAC1486.09                  | -1.11          |
|                                | Ribosome maturation protein SDO1 YLR022C                           | -1.36          |
| Conidiophore development       | Conidiophore development regulator abaA                            | -1.84          |
|                                | Developmental regulatory protein wetA                              | -2.10          |
|                                | C2H2 type master regulator of conidiophore development brlA        | -2.94          |
|                                | Conidiophore development regulator abaB                            | -2.23          |

bioRxiv preprint doi: <https://doi.org/10.1101/2022.02.18.480984>; this version posted February 18, 2022. The copyright holder for this preprint (which was not certified by peer review) is the author/funder, who has granted bioRxiv a license to display the preprint in perpetuity. It is made available under aCC-BY 4.0 International license.



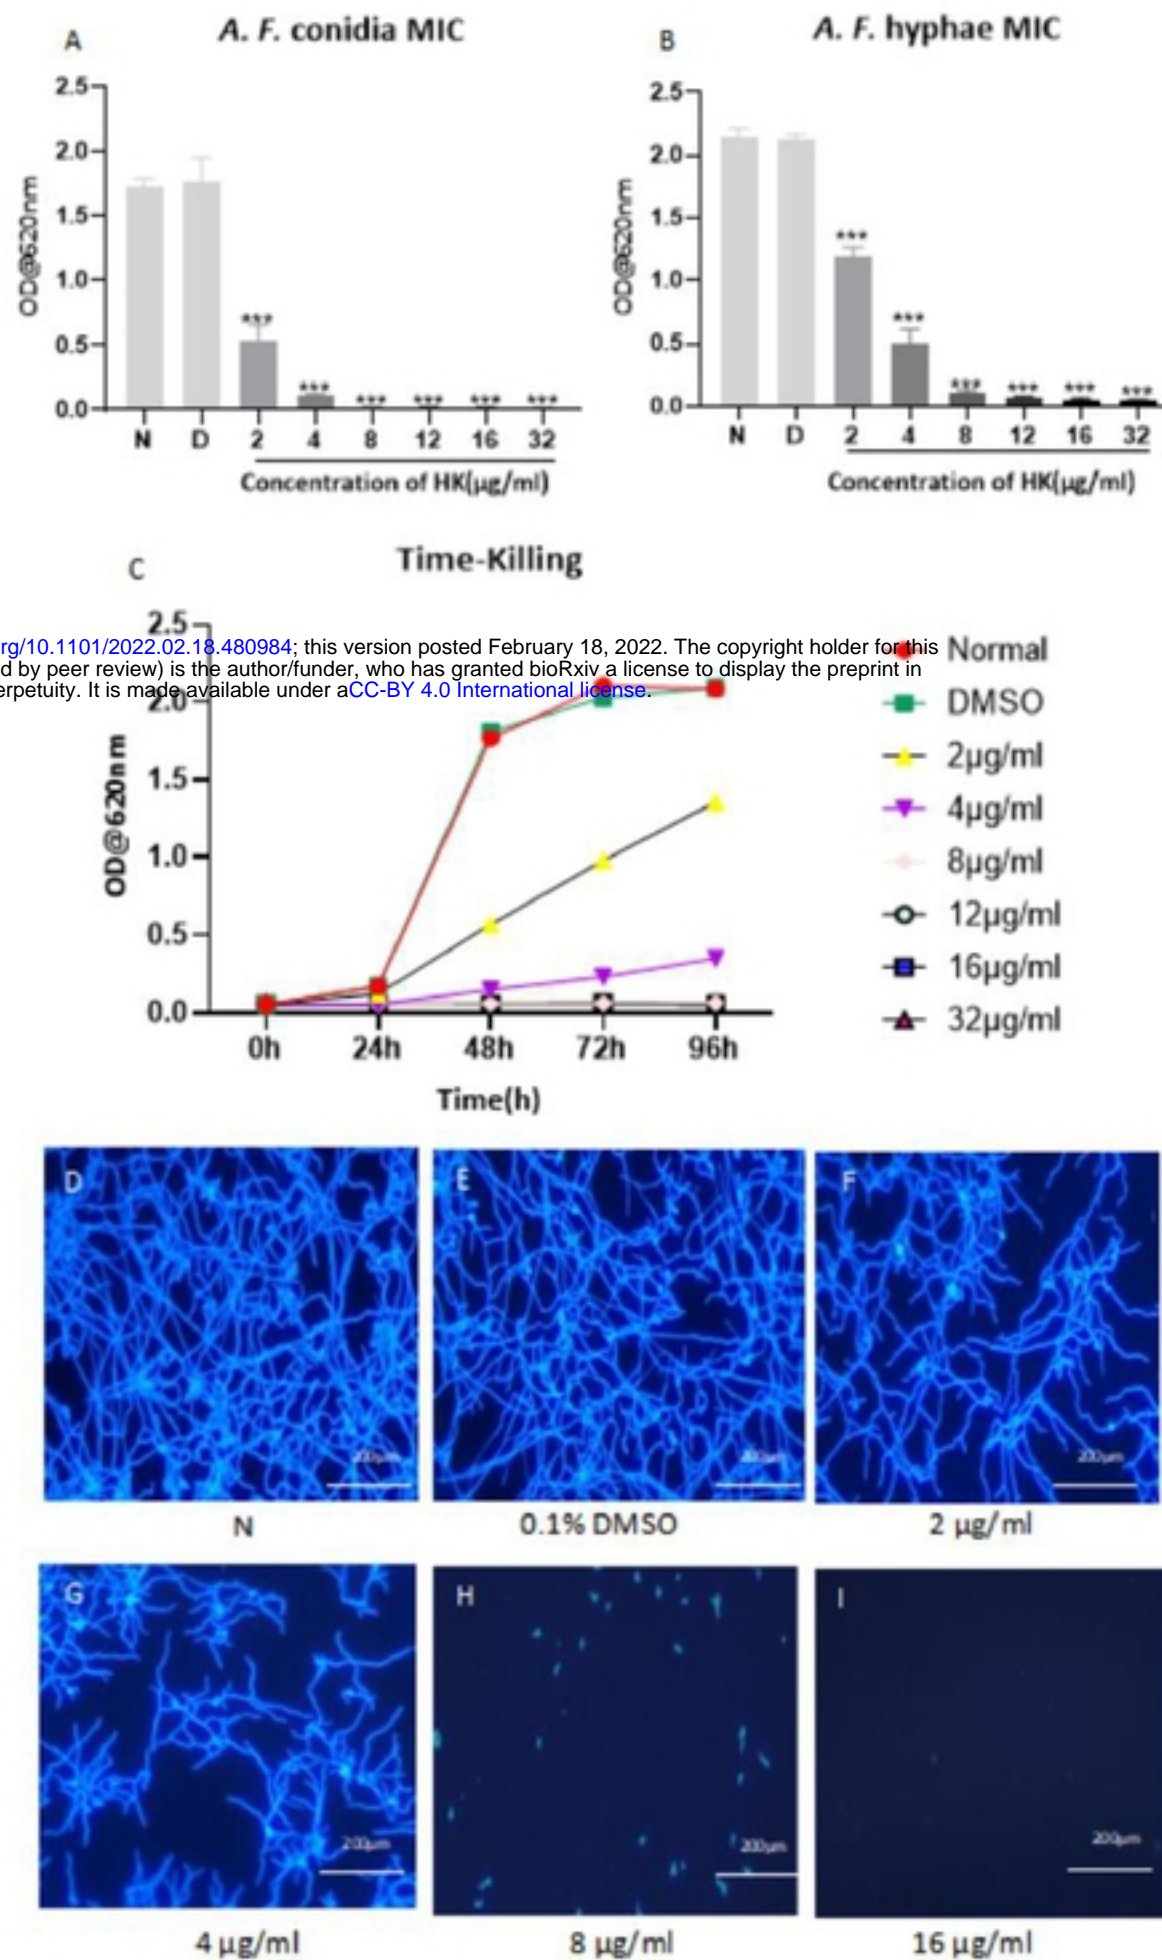

bioRxiv preprint doi: <https://doi.org/10.1101/2022.02.18.480984>; this version posted February 18, 2022. The copyright holder for this preprint (which was not certified by peer review) is the author/funder, who has granted bioRxiv a license to display the preprint in perpetuity. It is made available under aCC-BY 4.0 International license.

**Fig 1 Antifungal effect of HK in vitro.** *A.F.* conidia (A) or mycelium (B) were incubated with 2, 4, 8, 12, 16 and 32  $\mu\text{g/mL}$  HK or 0.1% DMSO. Time-killing curves for *A.F.* exposed to 2, 4, 8, 12, 16, and 32  $\mu\text{g/mL}$  of HK or 0.1% DMSO were performed over a period of 96 hours (C). HK decreased the fungal mass in a concentration-dependent manner at 36 h as measured by Calcofluor white staining.

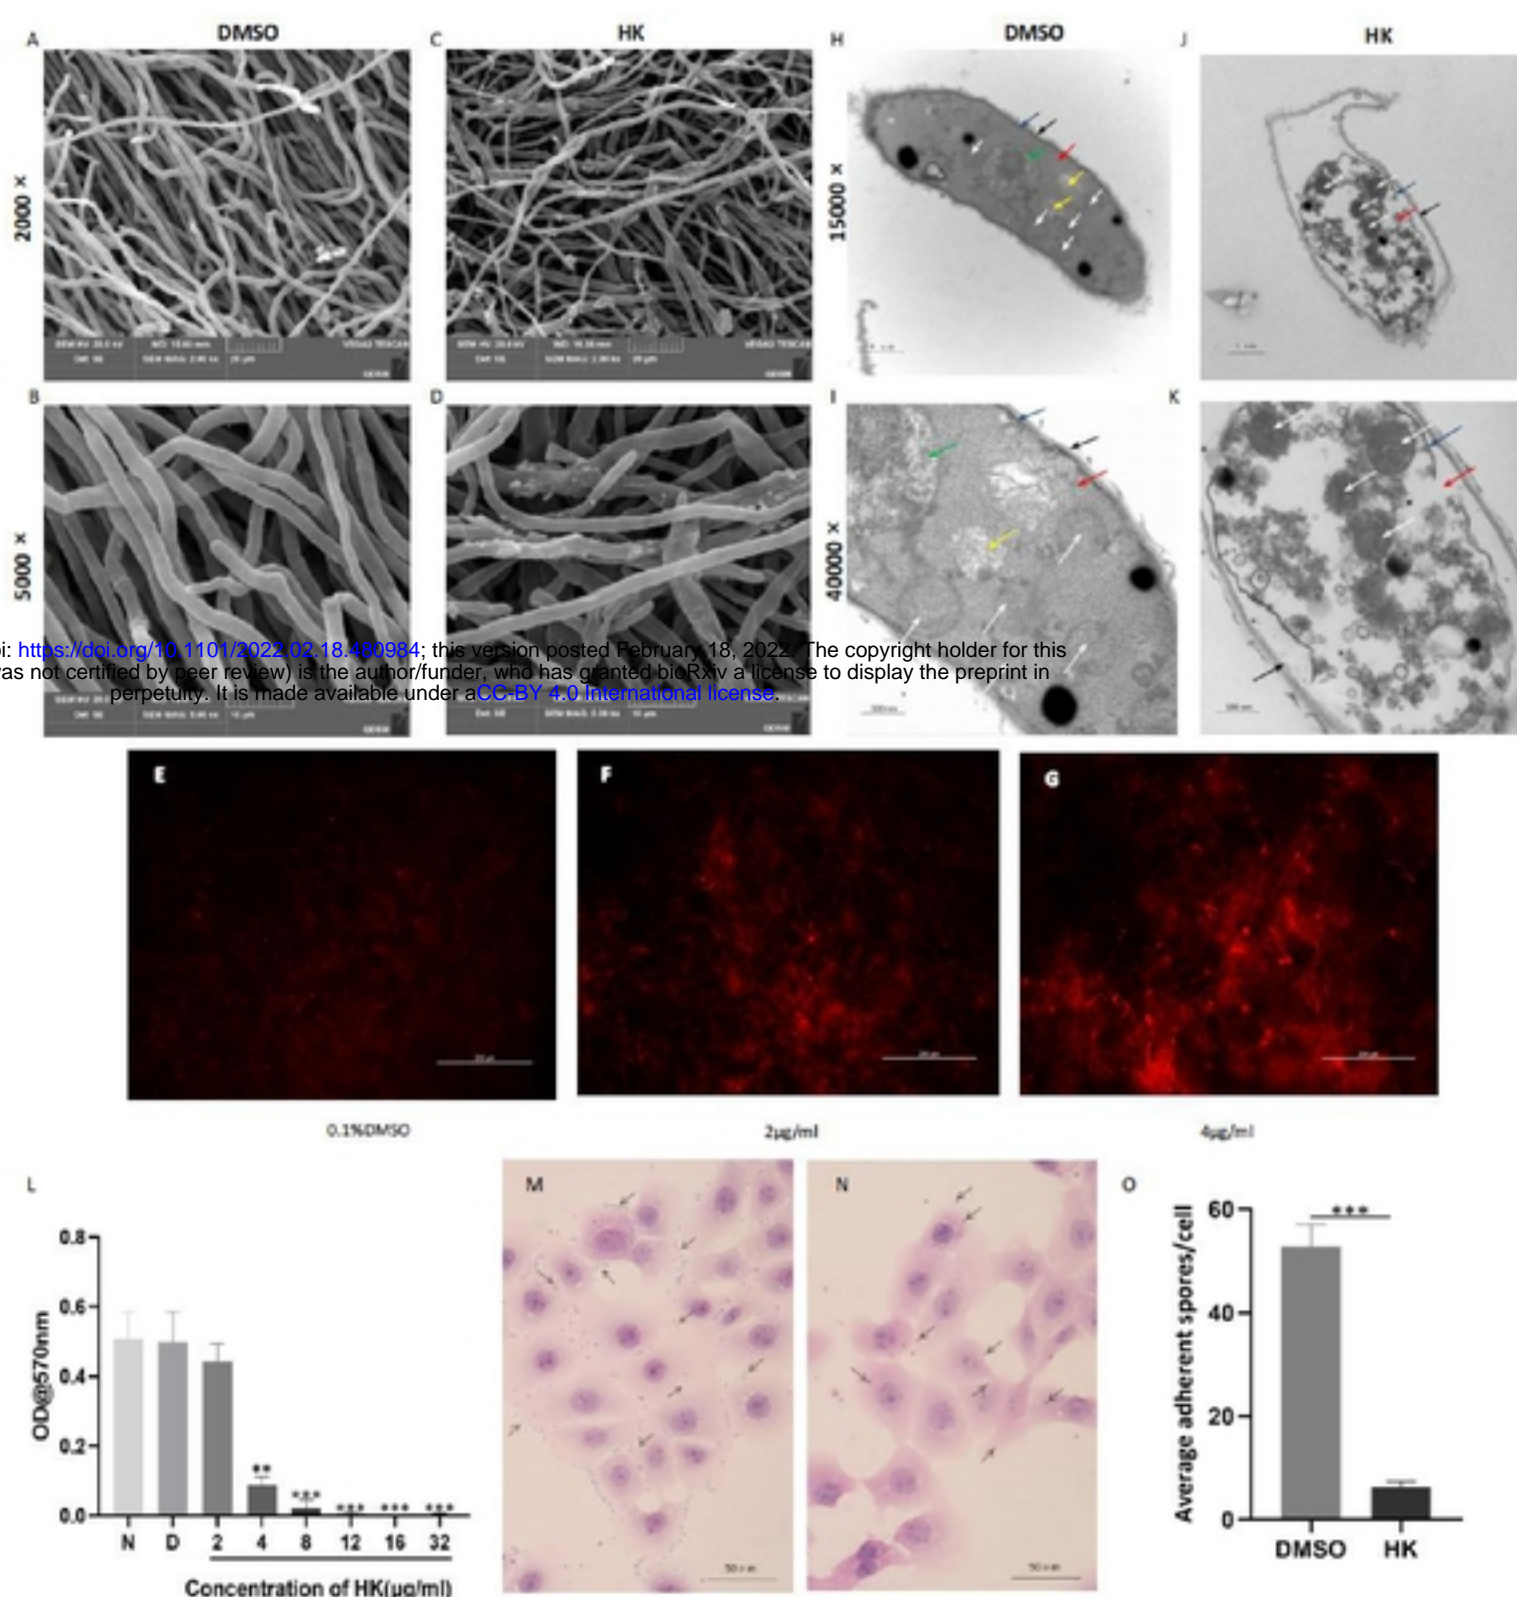

**Fig 2 Multiple mechanisms of HK inhibited *A.F.*** SEM images of *A.F.* mycelium which were treated with 0.1%DMSO (A, bar=20µm; B, bar =10µm) or 2µg/ml HK (C, bar = 20µm; D, bar = 10µm). PI staining showed compared with 0.1%DMSO group (E), cell membrane permeability increased after treatment with HK at 2 µg/ml (F) or 4 µg/ml (G; bar:100 µm). The effect of HK at 4 µg/ml on the ultrastructure of *A.F.* was demonstrated by TEM (J, bar=1µm, K, bar=500nm). 0.1%DMSO group was used as normal control group (H, bar=1µm, I, bar=500nm). In TEM images, black arrows mark the cell wall, blue arrows mark the membrane, red arrows mark the cytoplasm, green arrows mark the nucleus, yellow arrows mark the endoplasmic reticulum, and white arrows mark the mitochondria. According to the absorbance values of crystal violet released from biofilm, HK significantly inhibited the formation of biofilm at 4 µg/ml (L). HCECs which were infected with *A.F.* conidia were treated by HK (8 µg/ml, N, bar=50µm) or 0.1%DMSO (M, bar=50µm) for 3 hours respectively. In the HE staining picture, black arrows indicated conidia adhering to HCECs. Quantitative analysis was shown in figure O.

bioRxiv preprint doi: <https://doi.org/10.1101/2022.02.18.480984>; this version posted February 18, 2022. The copyright holder for this preprint (which was not certified by peer review) is the author/funder, who has granted bioRxiv a license to display the preprint in perpetuity. It is made available under aCC-BY 4.0 International license.

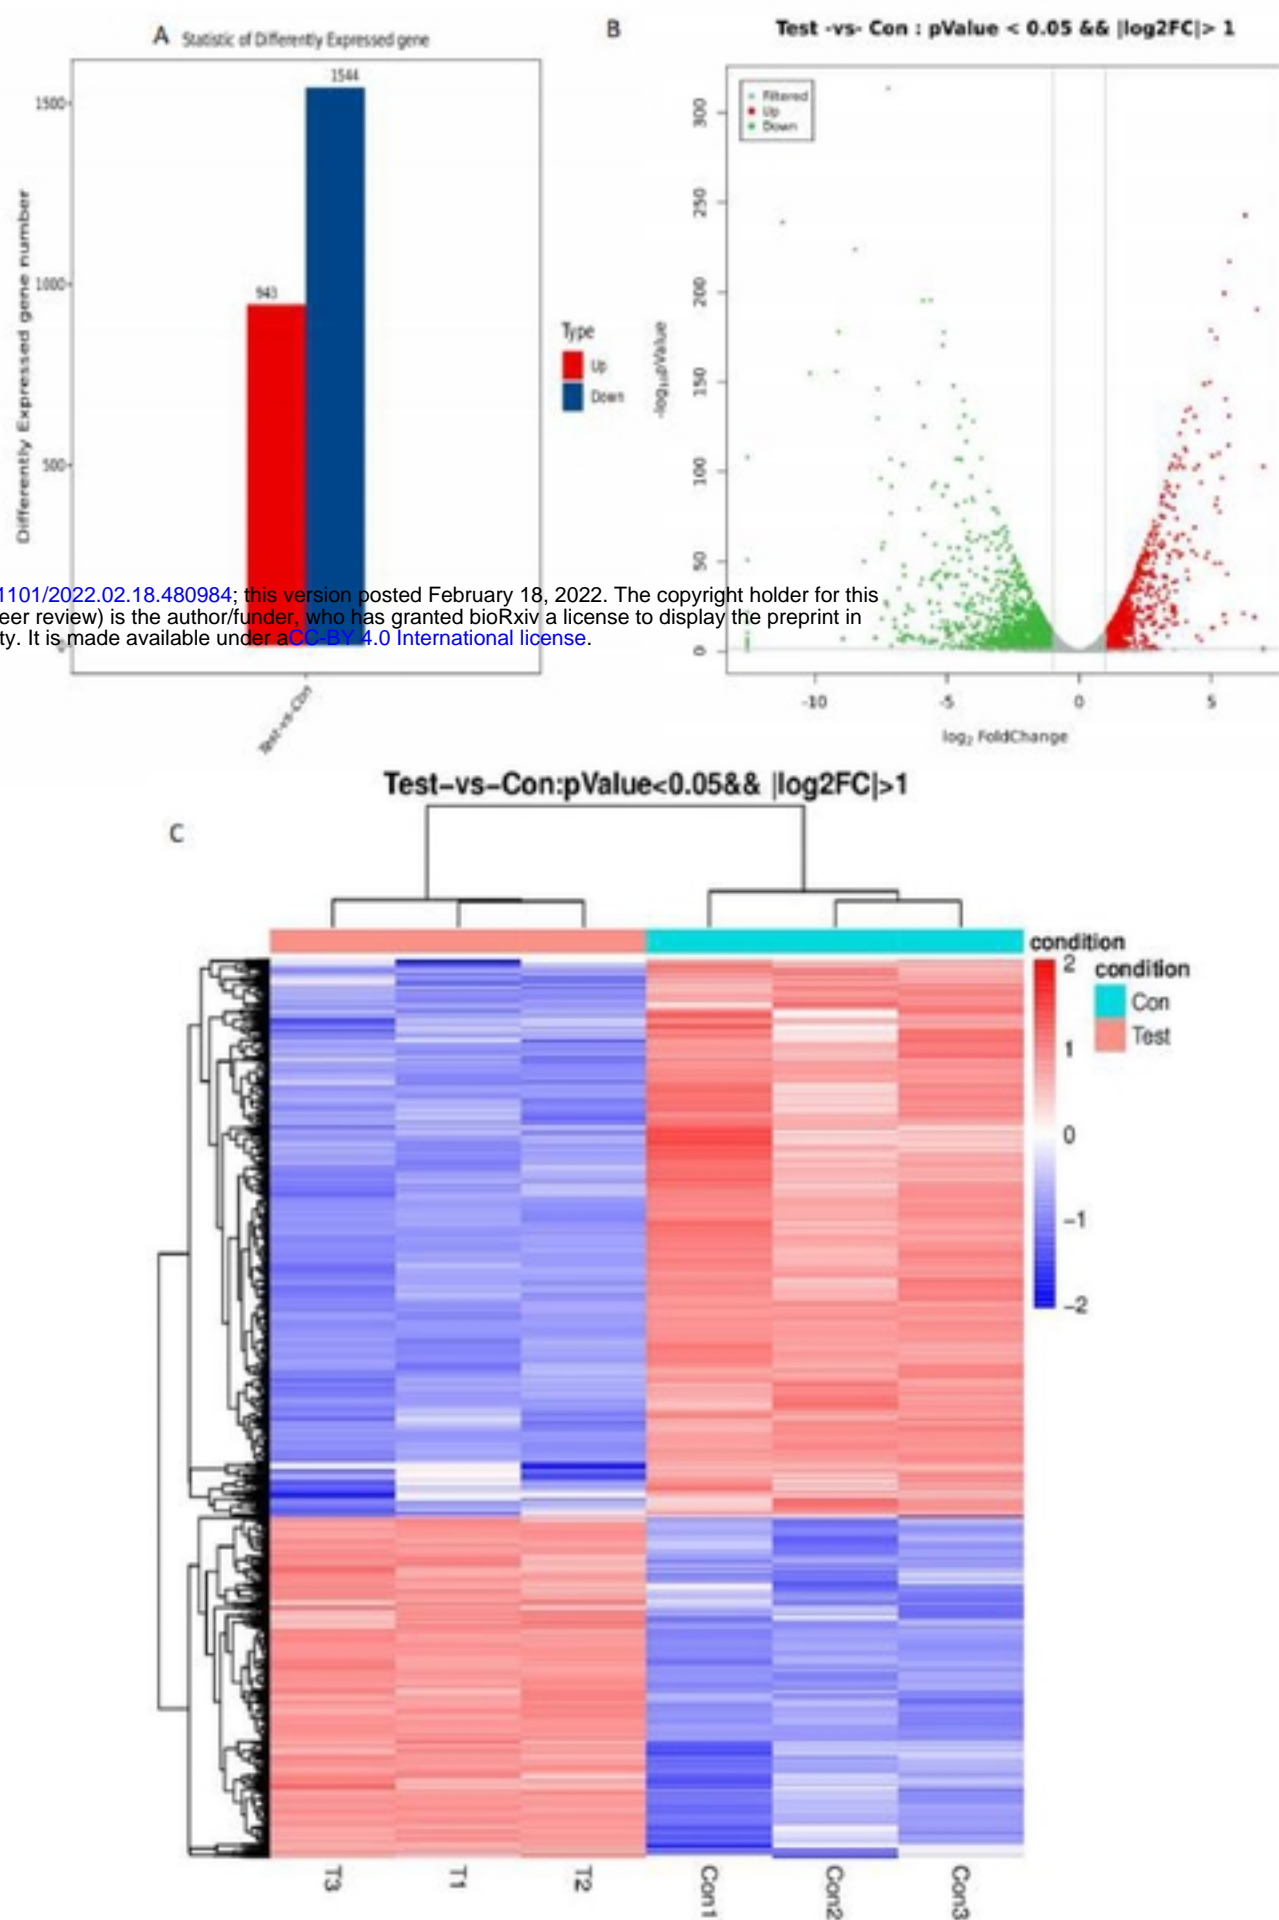

**Fig 3** Transcriptional comparison in *A.F.* treated with 0.1%DMSO or HK (2µg/ml). Statistical histogram of DEGs (A). Red bar represents up-regulated DEGs and blue bar represents down-regulated DEGs between HK treatment and the control. Volcano blot of DEGs (B). Up-regulated DEGs are shown in red dots and green dots represent down-regulated DEGs, while gray dots mark the genes with no significant difference. In the heat map, red represents the protein encoding gene with relatively high expression and blue represents the protein encoding gene with relatively low expression (C).

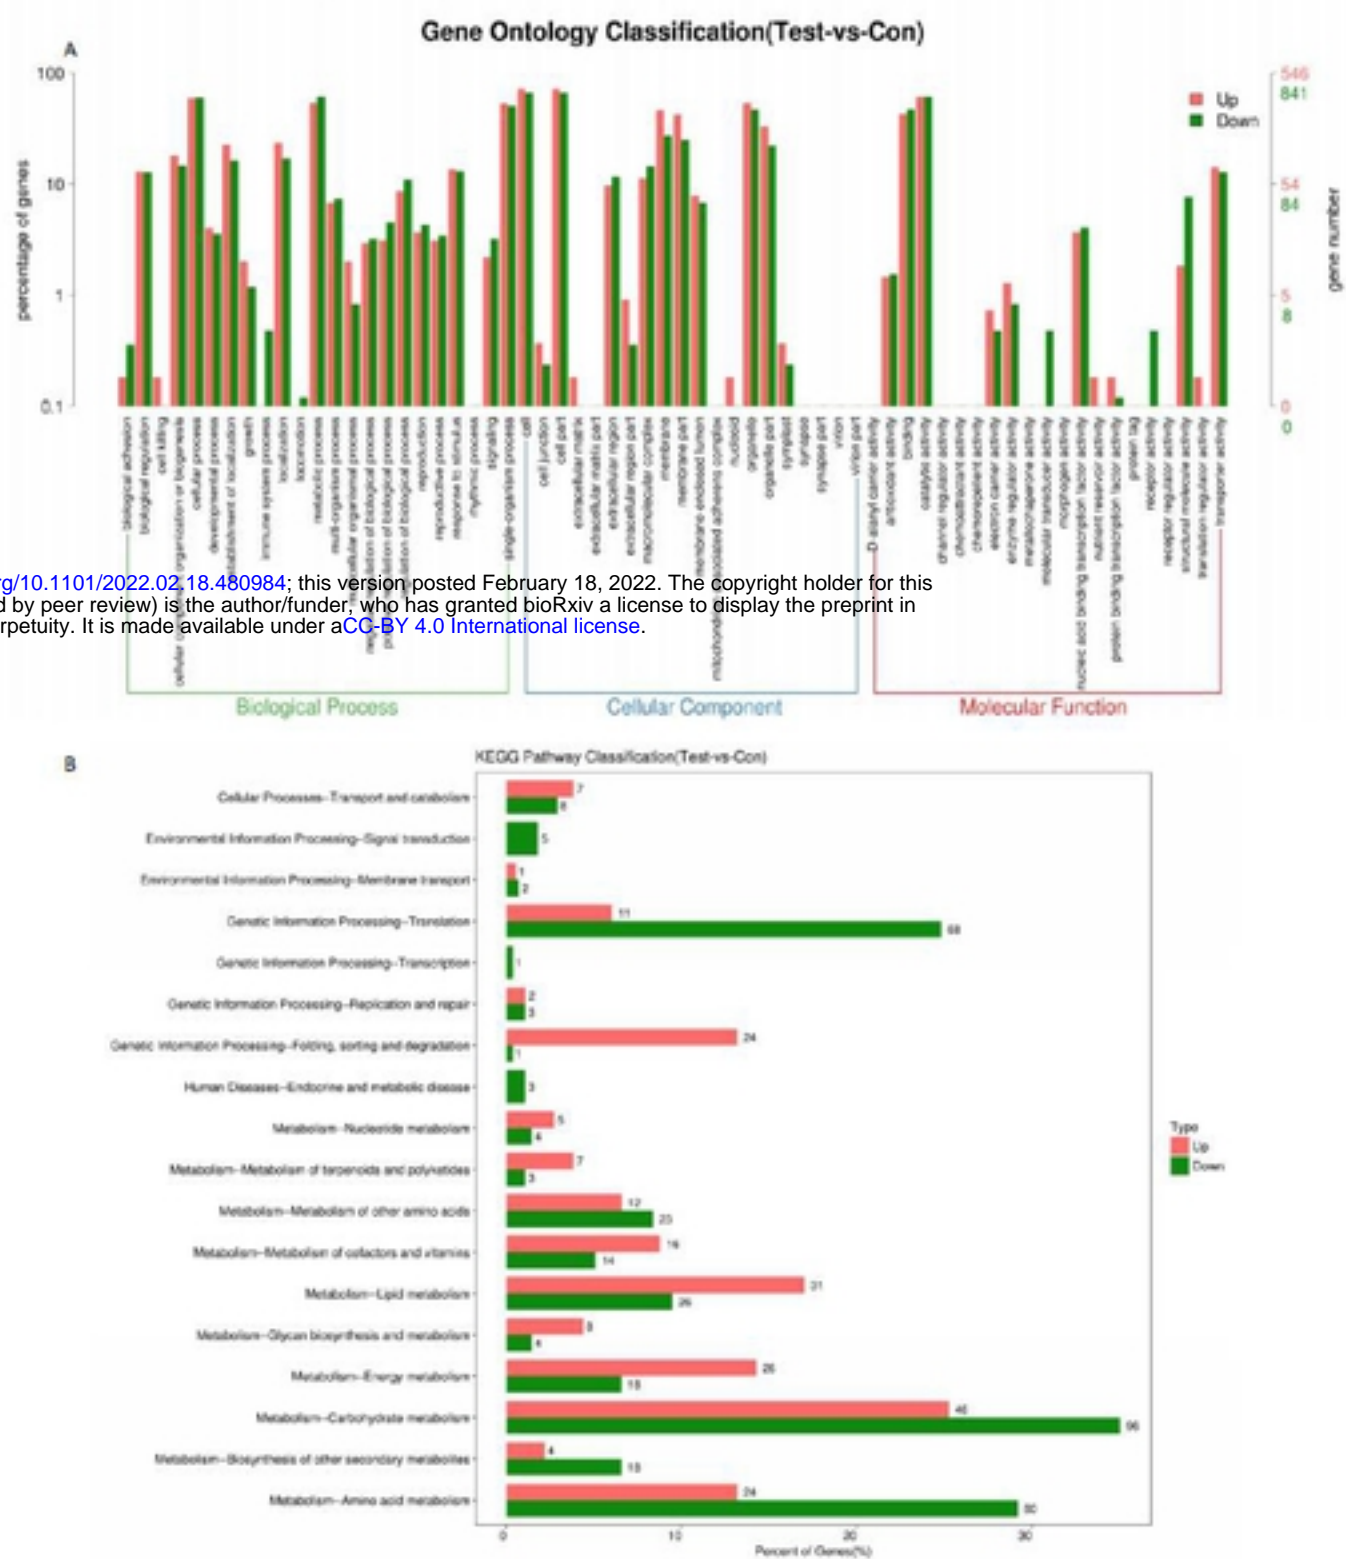

**Fig 4 GO categorization and KEGG pathway categorization analysis of DEGs in *A.F.* treated with 0.1%DMSO or HK (2  $\mu$ g/ml). Comparison of the distribution of up-regulated (red) and down-regulated (green) DEGs at GO categorization (A). KEGG pathway categorization distribution map of up-regulated (red) and down-regulated (green) DEGs (B).**

bioRxiv preprint doi: <https://doi.org/10.1101/2022.02.18.480984>; this version posted February 18, 2022. The copyright holder for this preprint (which was not certified by peer review) is the author/funder, who has granted bioRxiv a license to display the preprint in perpetuity. It is made available under aCC-BY 4.0 International license.

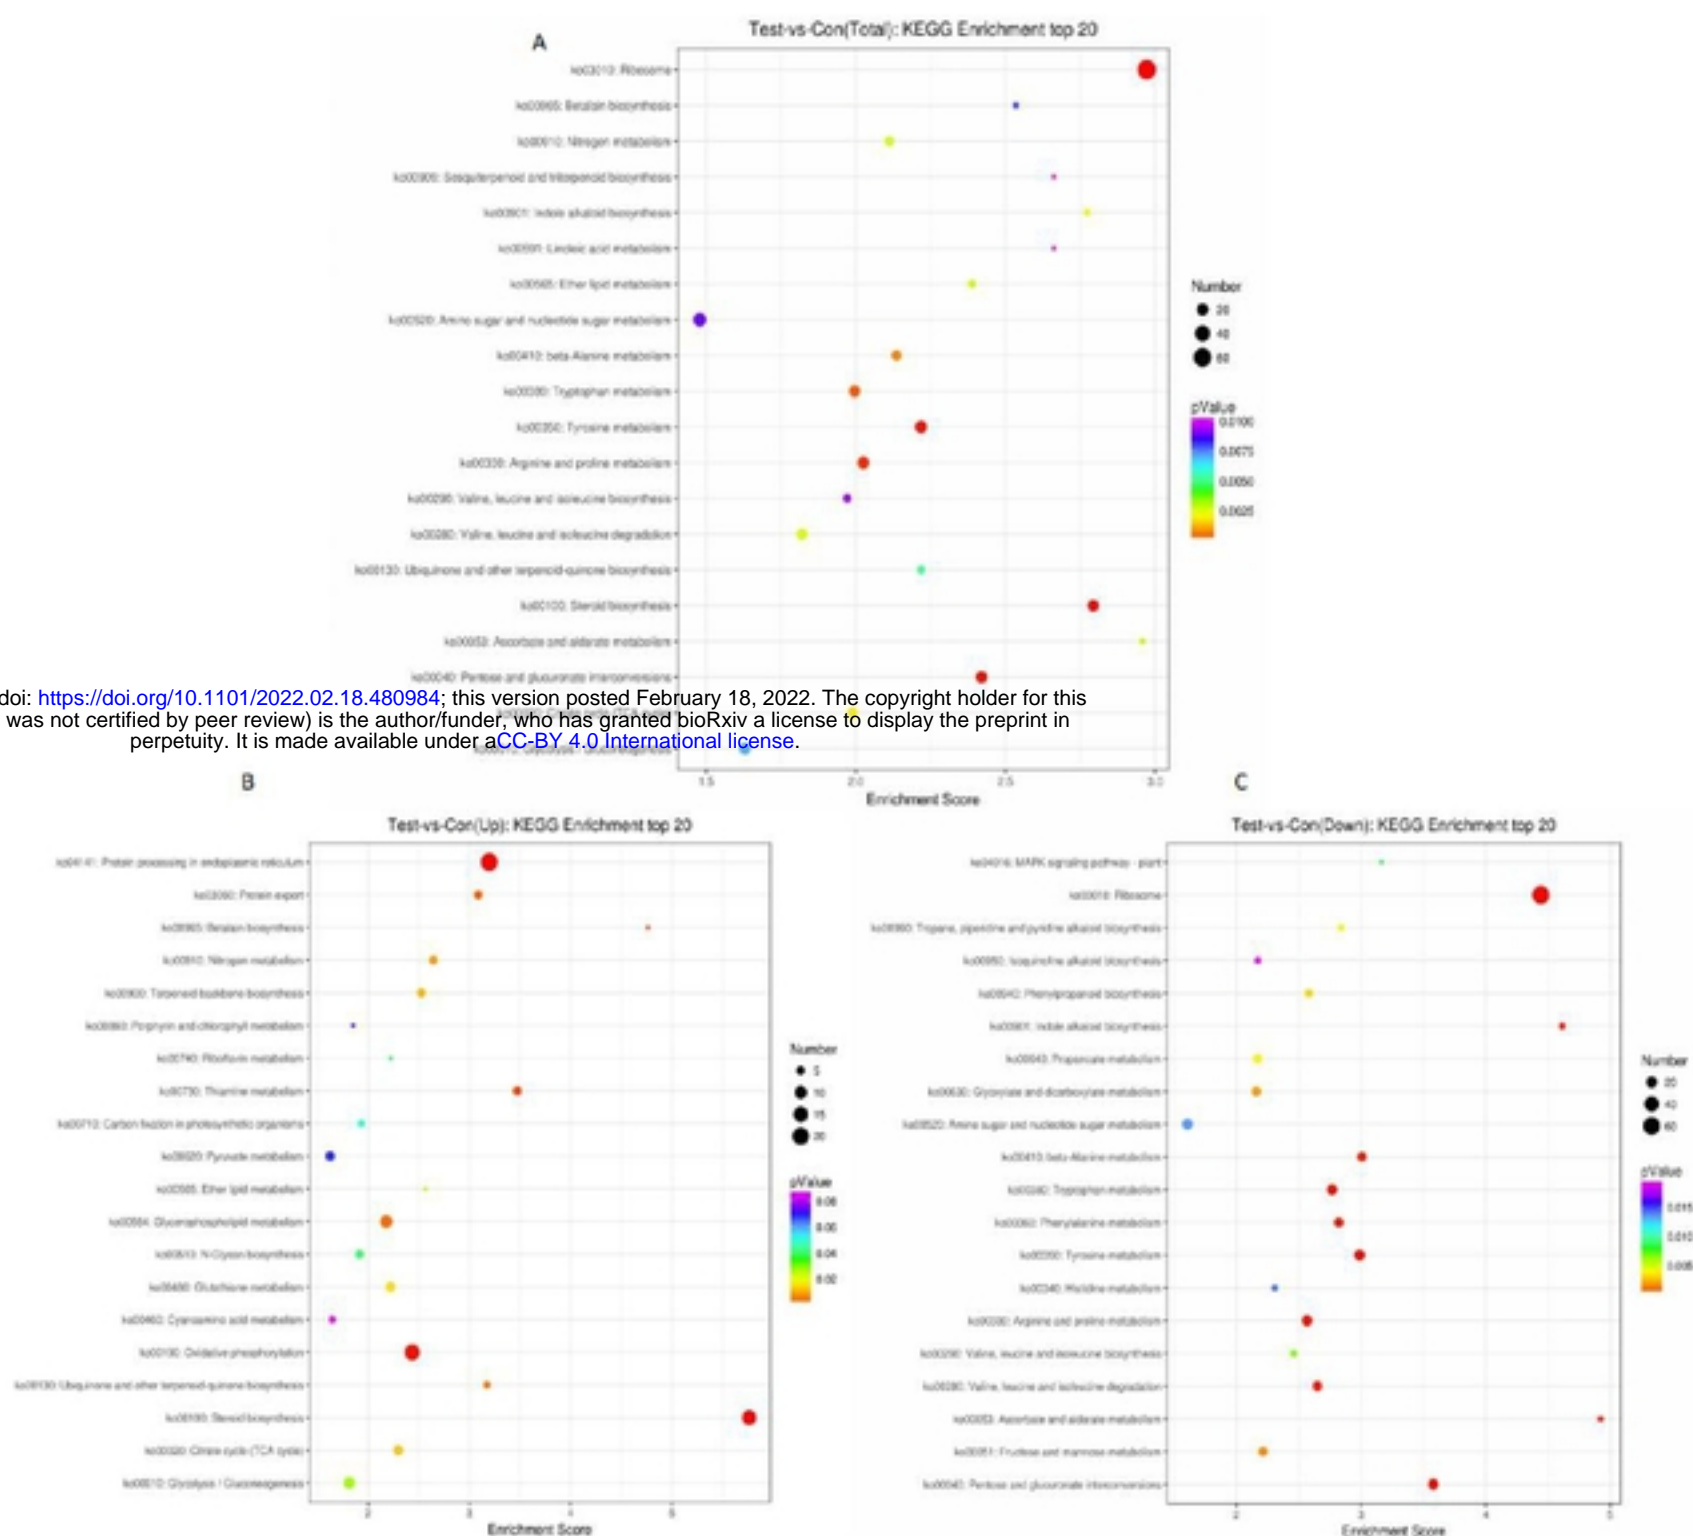

**Fig 5 The top20 KEGG pathway categorization analysis of DEGs.** Tote top 20 (A); Up top 20 (B); Down top 20 (C). The horizontal axis in the figure represents Enrichment. Items with larger bubbles contain more differentially encoded genes, and the bubble color varies from purple-blue-green to red, indicating the smaller enrichment pValue and greater significance.

bioRxiv preprint doi: <https://doi.org/10.1101/2022.02.18.480984>; this version posted February 18, 2022. The copyright holder for this preprint (which was not certified by peer review) is the author/funder, who has granted bioRxiv a license to display the preprint in perpetuity. It is made available under aCC-BY 4.0 International license.

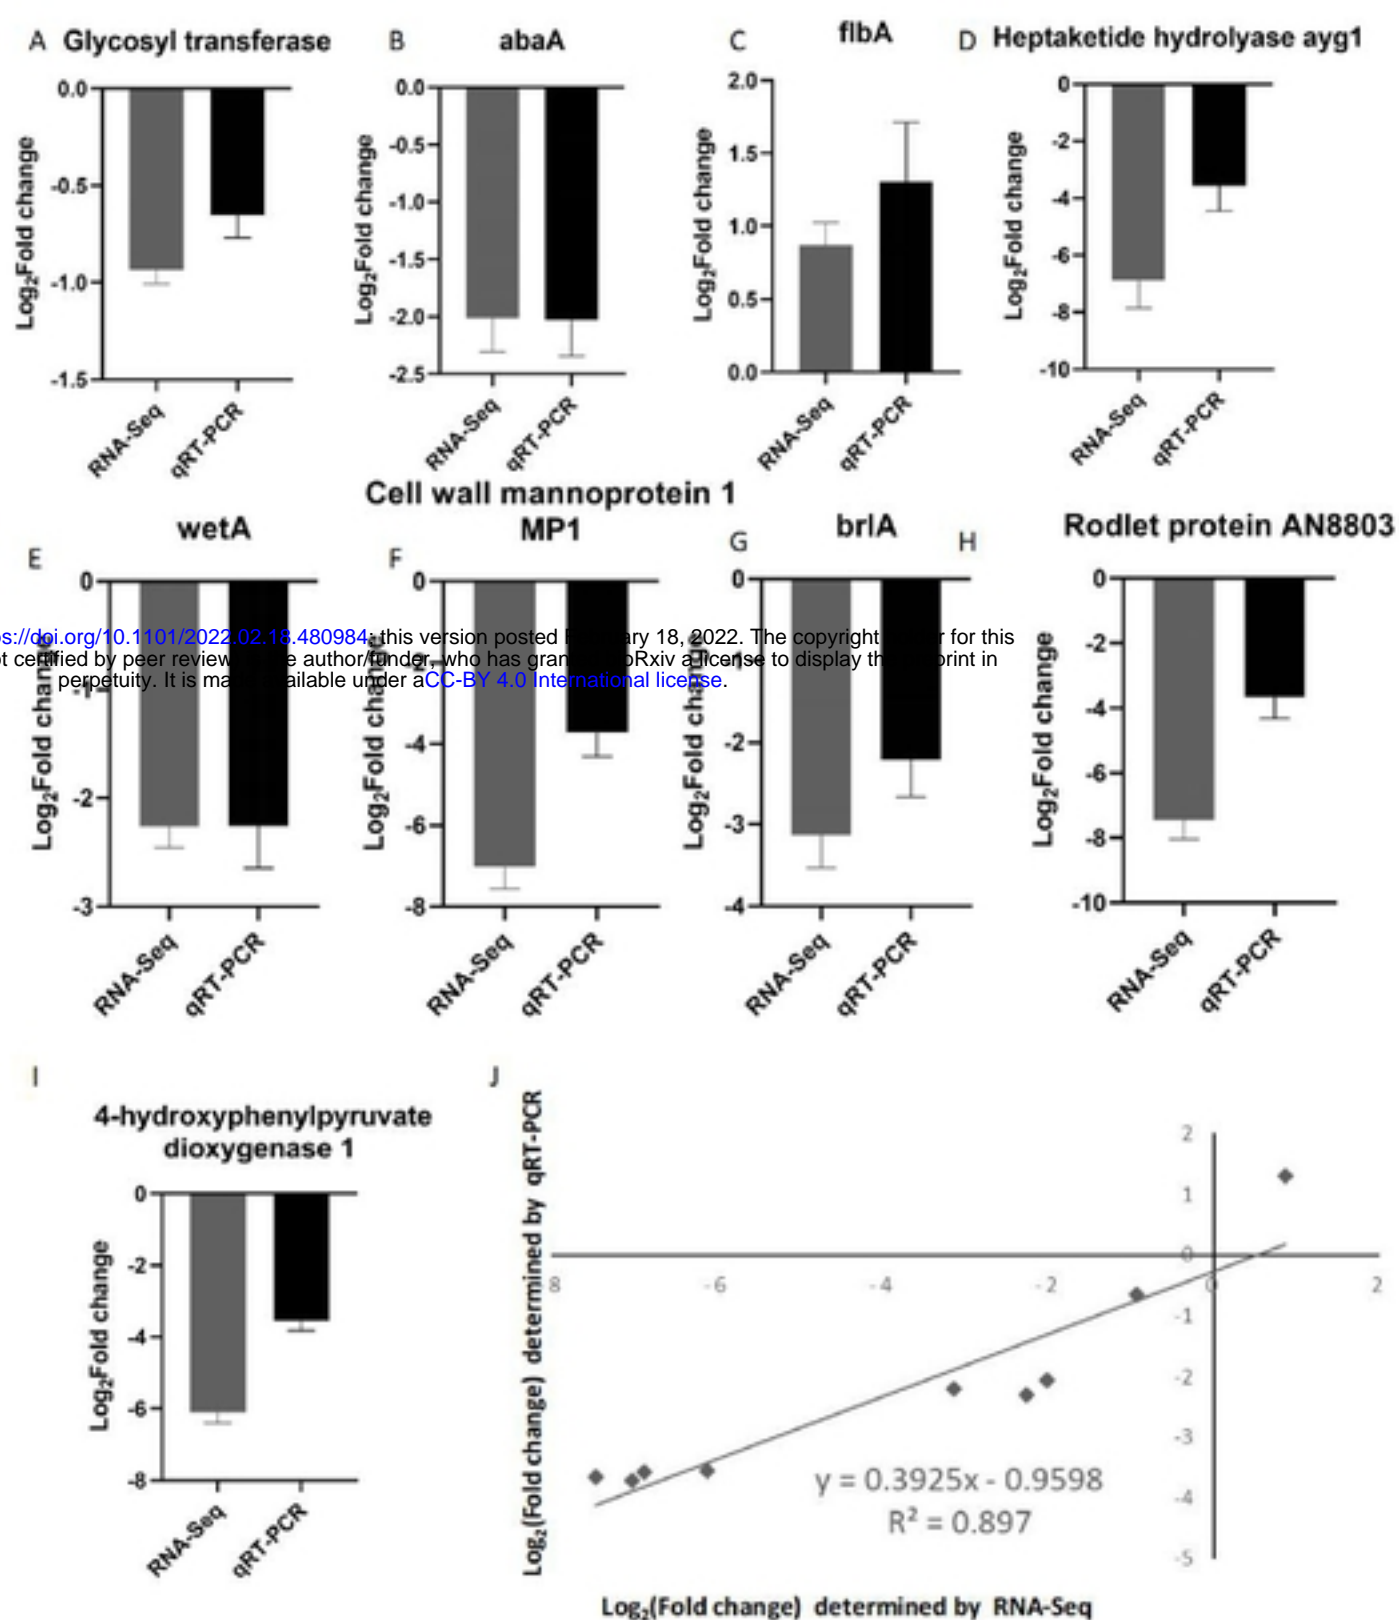

**Fig 6 Correlation of expression level between RNA-Seq (gray) and qRT-PCR (black).** The 9 selected genes were Glycosyl transferase (A), abaA (B), flbA (C), Heptaketide hydrolyase ayg1 (D), wetA (E), Cell wall mannoprotein 1 MP1 (F), brlA (G), Rodlet protein AN8803 (H), 4-hydroxyphenylpyruvate dioxygenase 1 (I). Correlation between the RNA-Seq and qRT-PCR data are plotted in figure J.

bioRxiv preprint doi: <https://doi.org/10.1101/2022.02.18.480984>; this version posted February 18, 2022. The copyright holder for this preprint (which was not certified by peer review) is the author/funder, who has granted bioRxiv a license to display the preprint in perpetuity. It is made available under aCC-BY 4.0 International license.

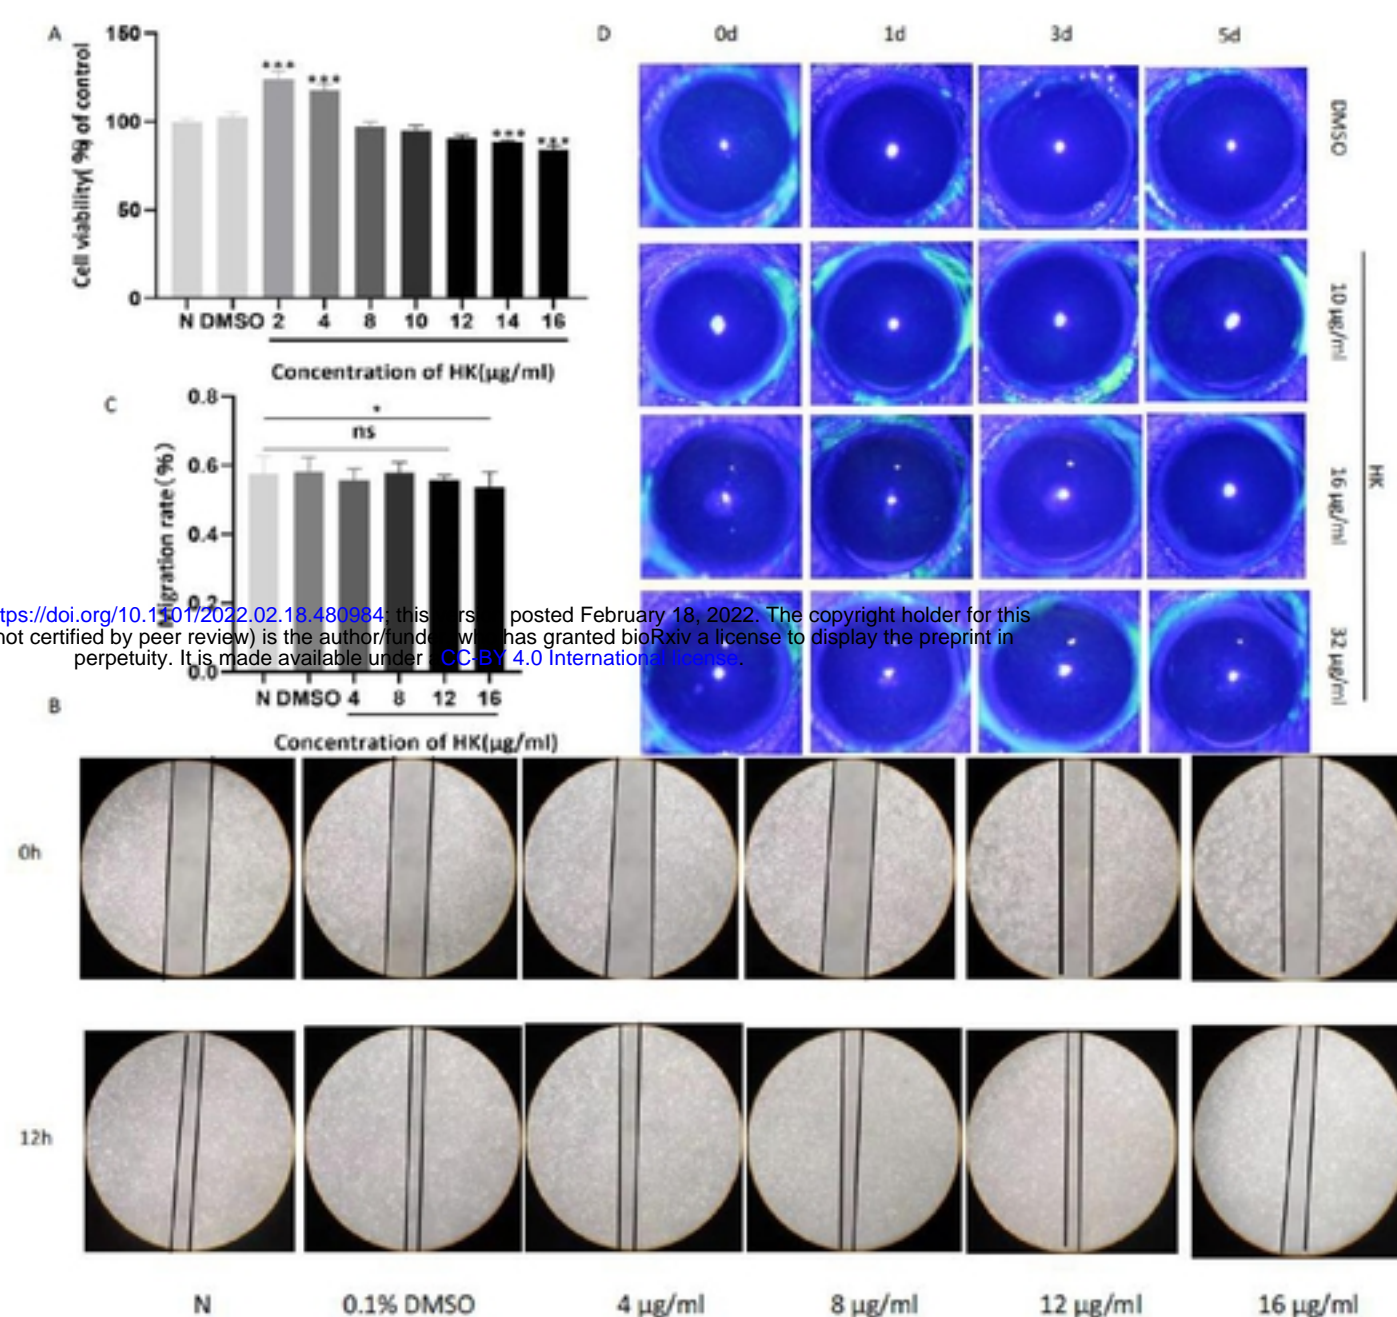

**Fig 7 Effects of HK on cell viability and cornea toxicity.** HCECs were treated with HK (0, 2, 4, 8, 10, 12, 14 and 16  $\mu\text{g/mL}$ ) or 0.1%DMSO for 24 hours and then incubated with CCK-8 for 3 hours to explore the effect of HK on cell viability (A). Wound healing assay (B) and quantitative analysis (C) were used to evaluate the effect of HK on cell migration. The Draize Test was used to test the potential adverse effects of HK on cornea (D).

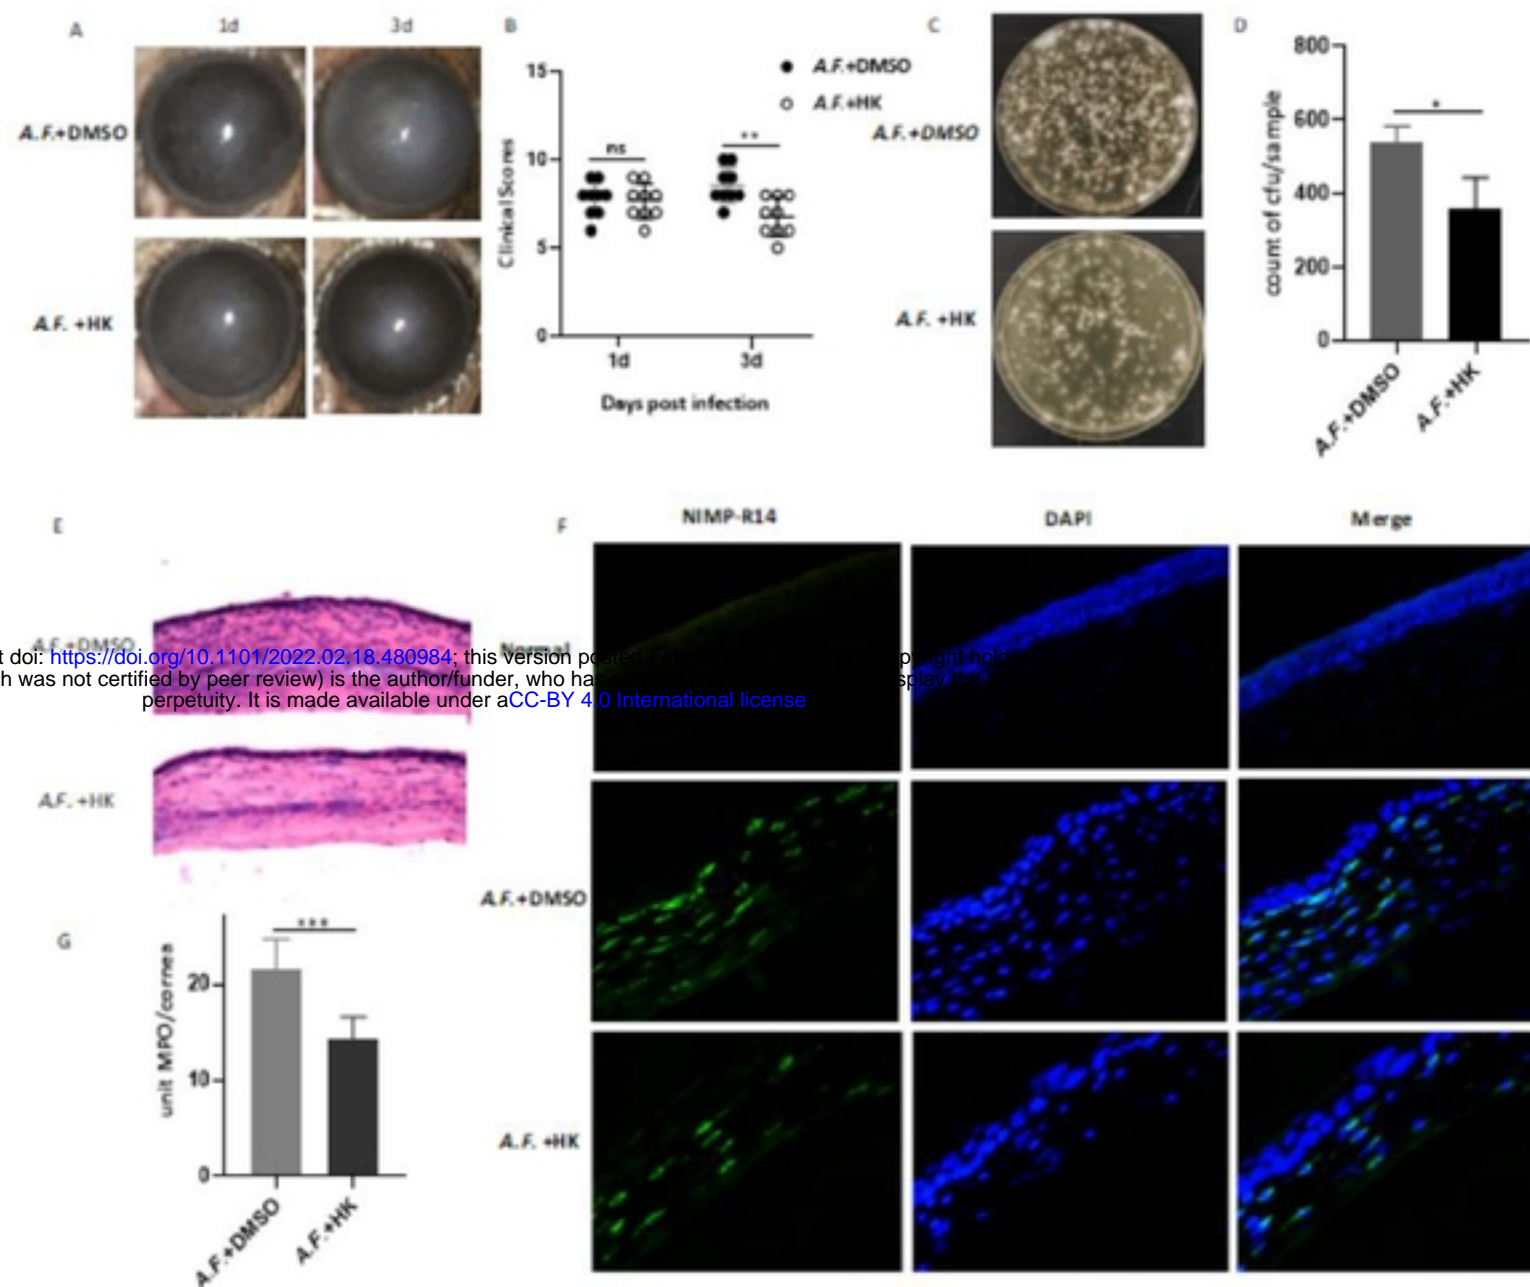

bioRxiv preprint doi: <https://doi.org/10.1101/2022.02.18.480984>; this version posted February 18, 2022. The copyright holder for this preprint (which was not certified by peer review) is the author/funder, who has granted bioRxiv a license to display the preprint in perpetuity. It is made available under aCC-BY 4.0 International license.

**Fig 8** FK severity was alleviated followed by HK treatment compared with the DMSO group. The slit-lamp photography (A) and clinical score (B) showed that HK reduced corneal opacity and clinical scores on 3 days post-infection compared with the DMSO-treated cornea. HK treatment of C57BL/6 mice reduced the number of viable fungal colonies in infected corneas compared with DMSO group (C) and the quantitative analysis (D). On 3 days post-infection, representative images of HE staining of the cornea treated with HK or DMSO (E, 400×). The fluorescence of neutrophils in corneas of normal group, HK-treatment group or DMSO-treatment group (F, 400×). The neutrophils were stained with NIMP-R14 with green fluorescence, and the nucleus is stained with DAPI and has blue fluorescence. MPO levels were shown in figure G.



bioRxiv preprint doi: <https://doi.org/10.1101/2022.02.18.480984>; this version posted February 18, 2022. The copyright holder for this preprint (which was not certified by peer review) is the author/funder, who has granted bioRxiv a license to display the preprint in perpetuity. It is made available under aCC-BY 4.0 International license.

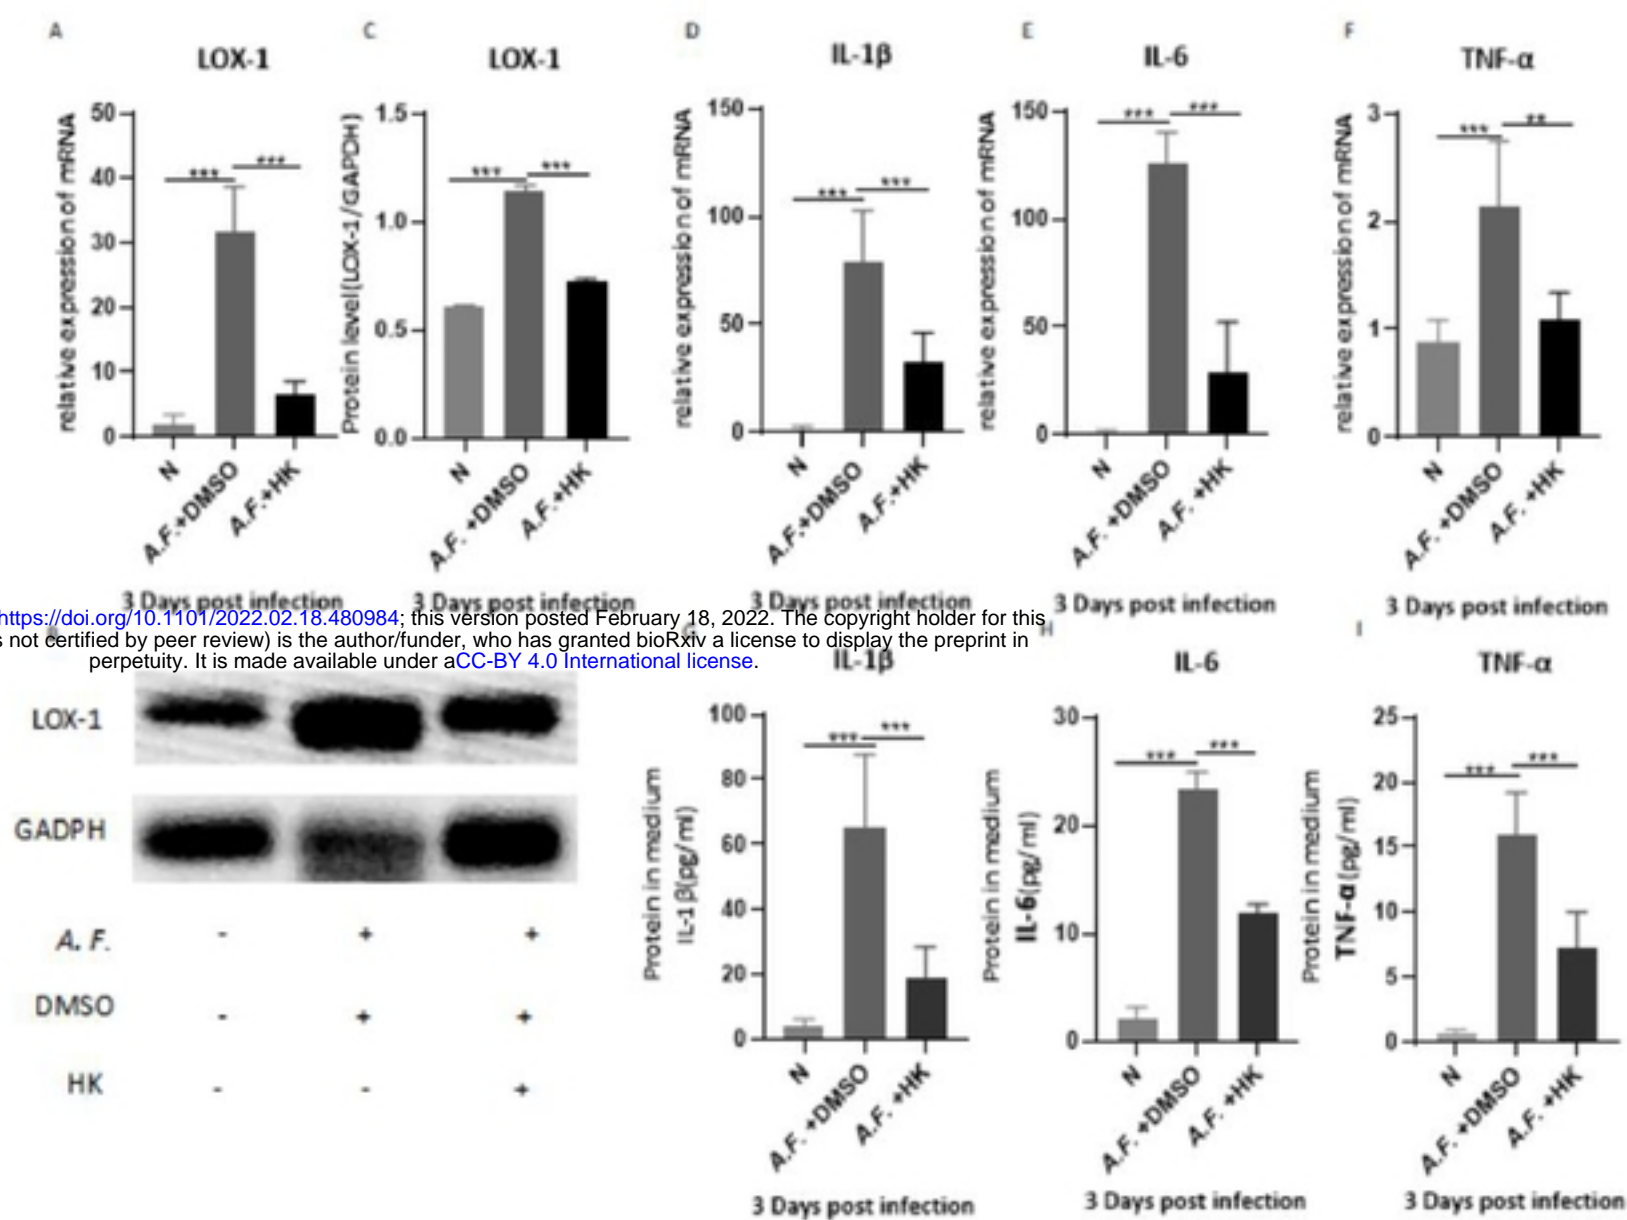

**Fig 9** HK decreased the inflammatory mediators in corneas induced by *A.F.*. qRT-PCR results for LOX-1 (A), IL-1 $\beta$  (D), IL-6 (E), and TNF- $\alpha$  (F) in *A.F.* infected mouse cornea treated with DMSO or HK 3 days post infection. The protein expression of LOX-1 was detected by Western Blot (B, C). The protein levels of IL-1 $\beta$  (G), IL-6 (H), and TNF- $\alpha$  (I) were tested by ELISA.

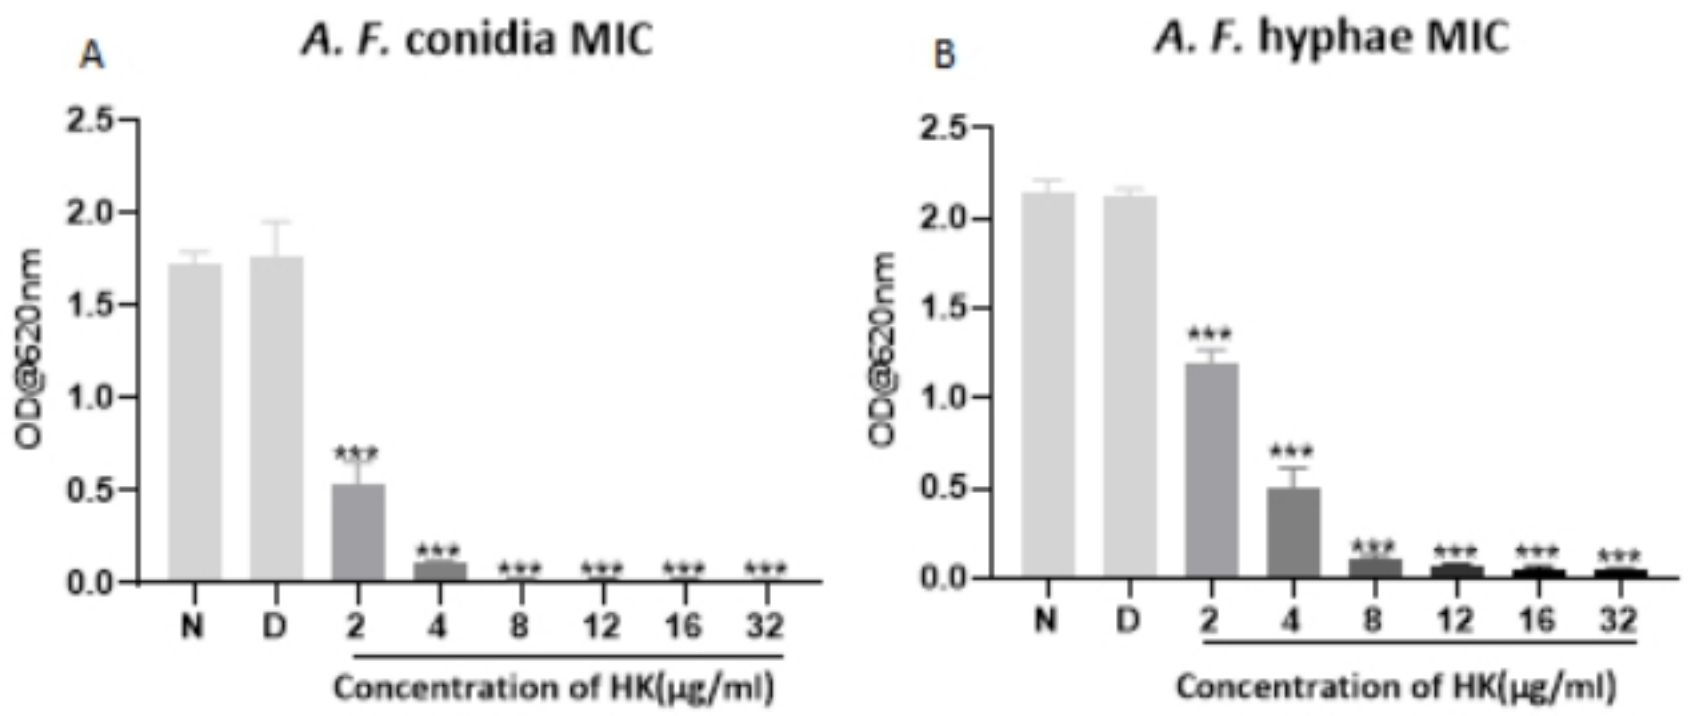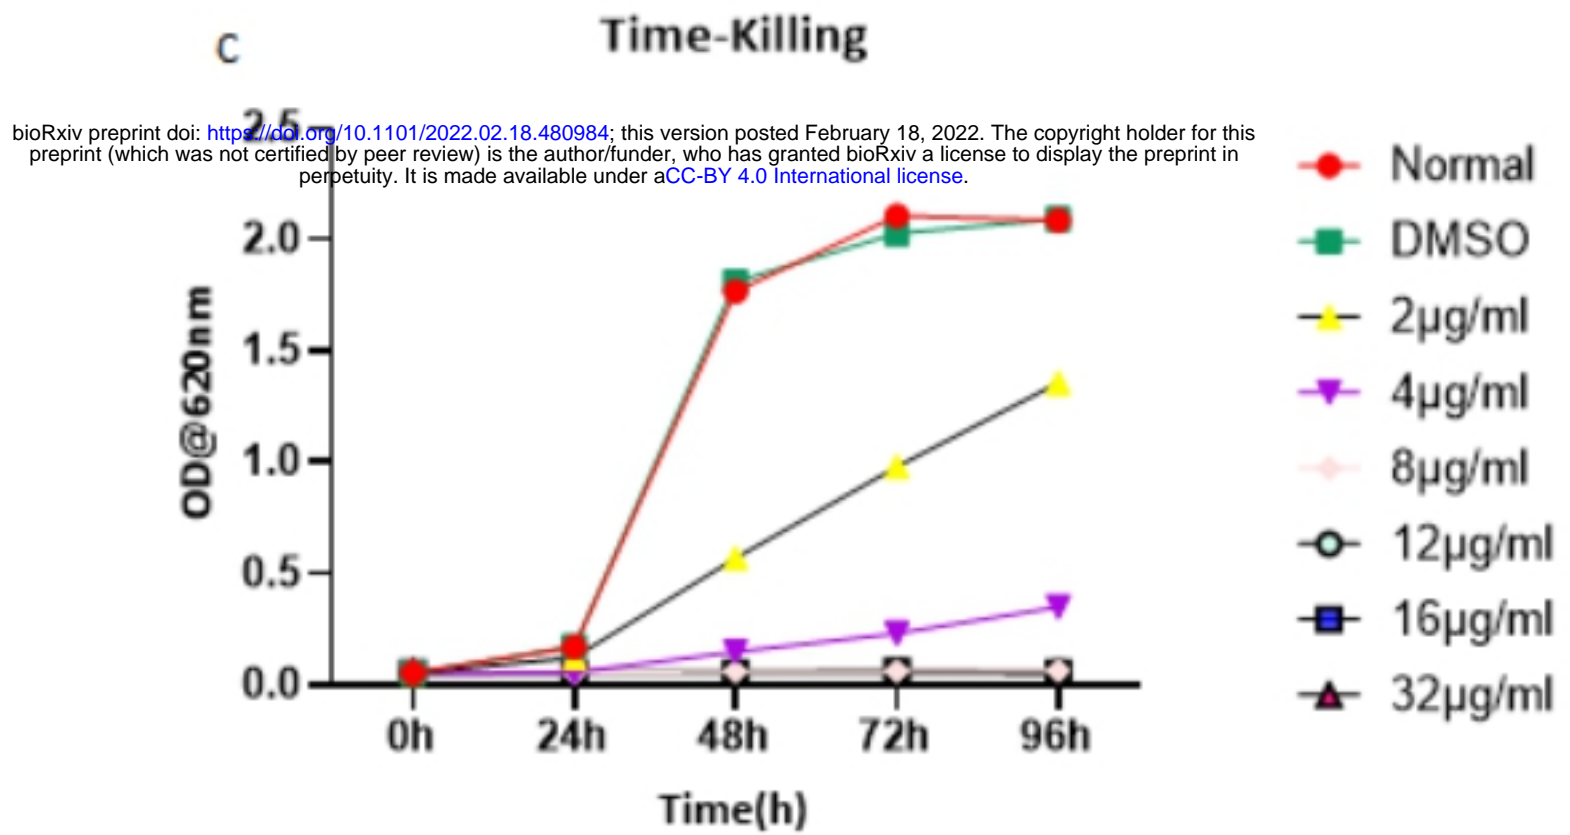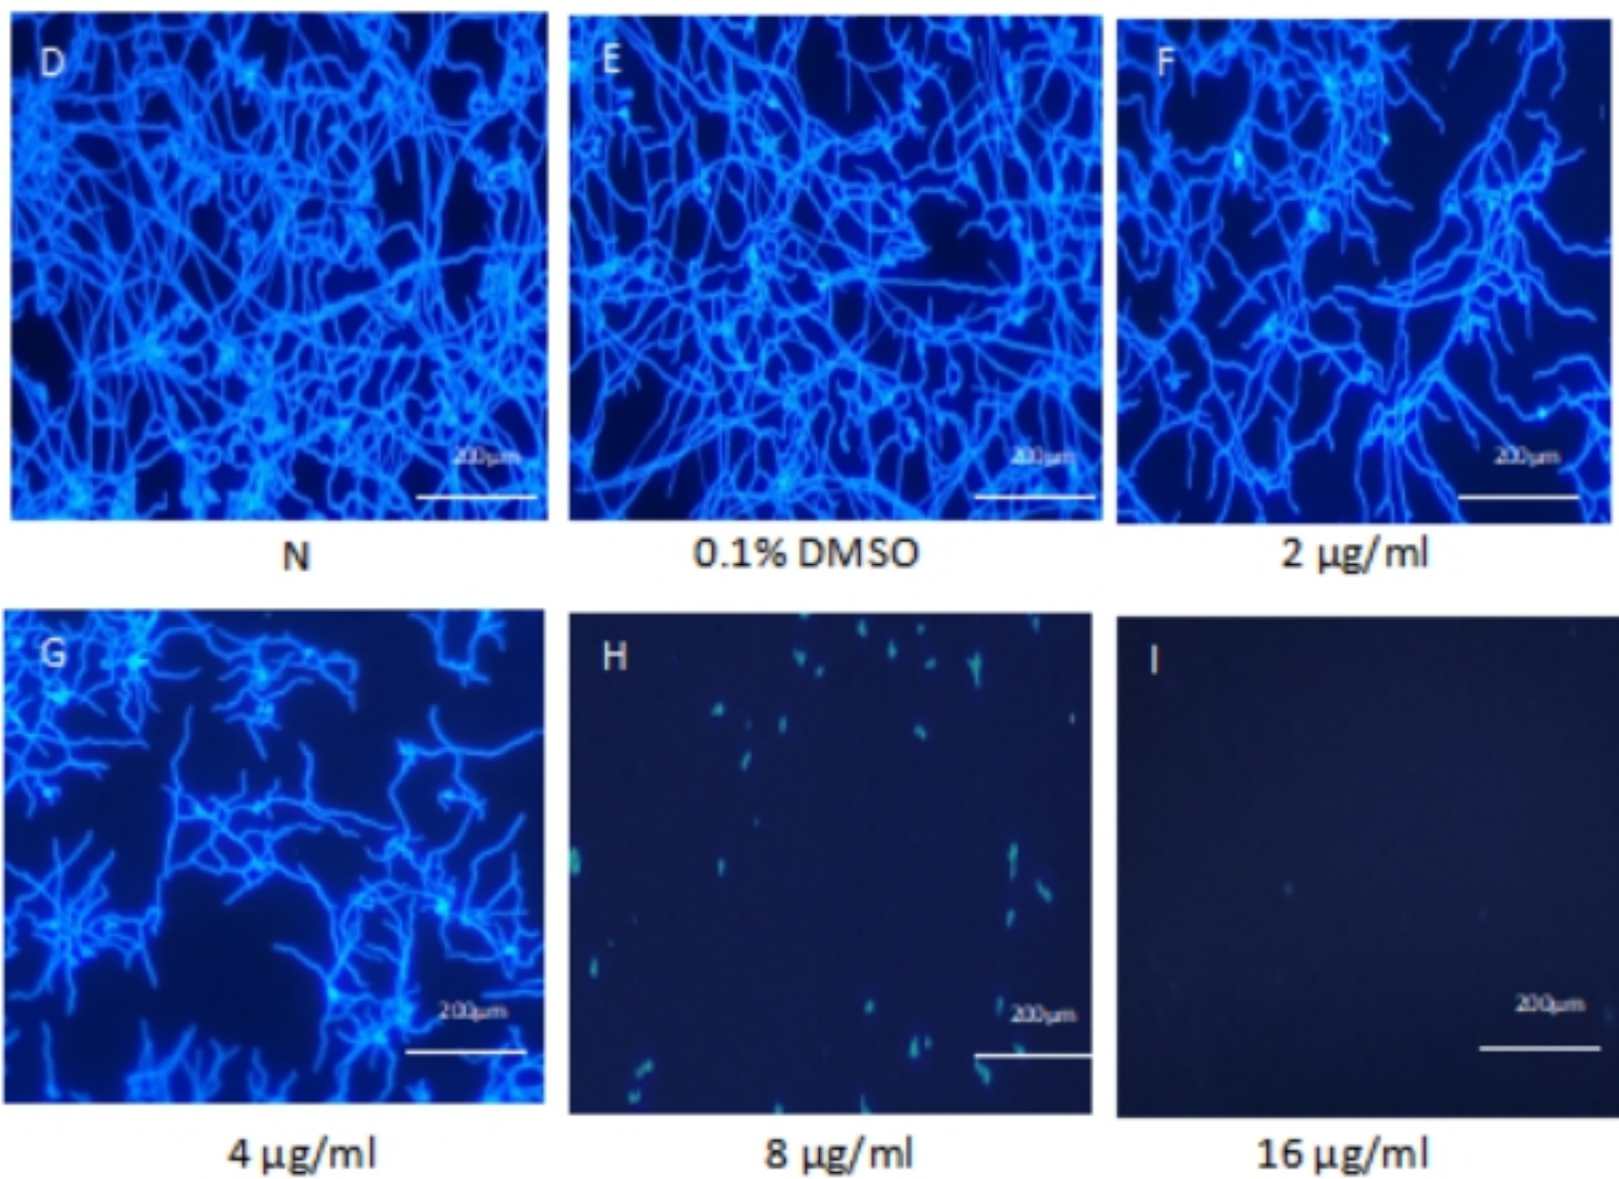

Fig1

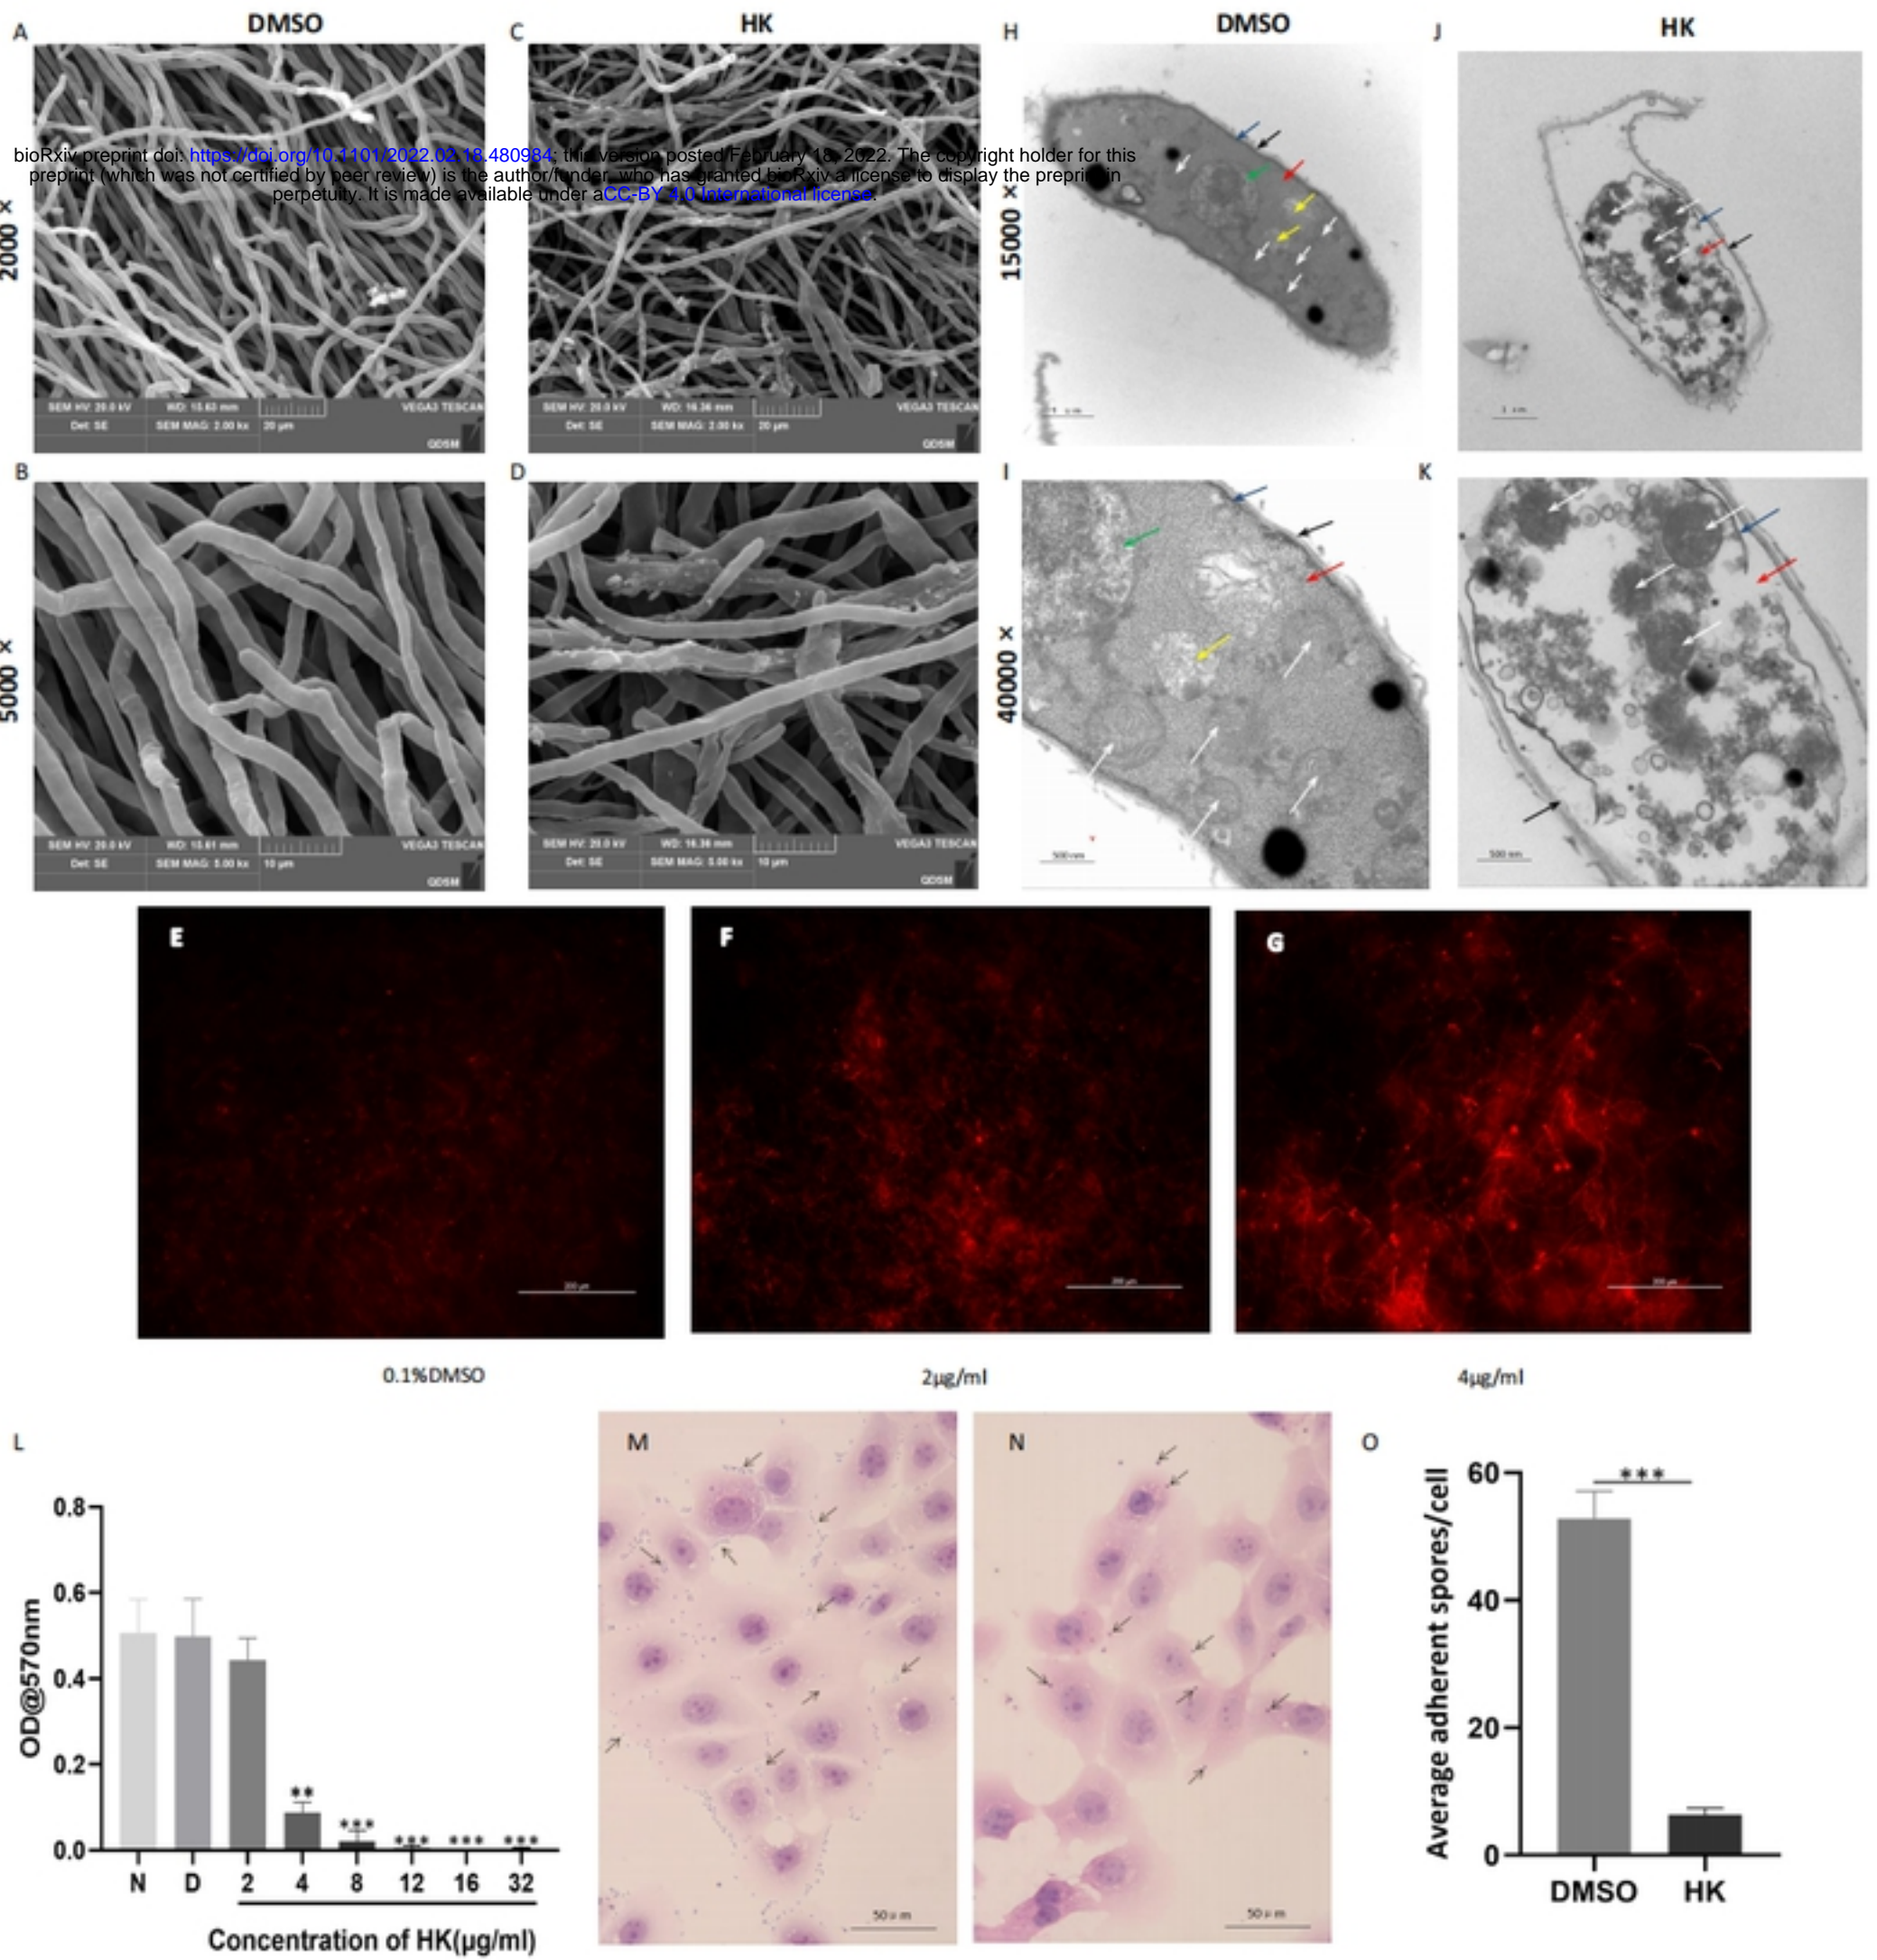

Fig2

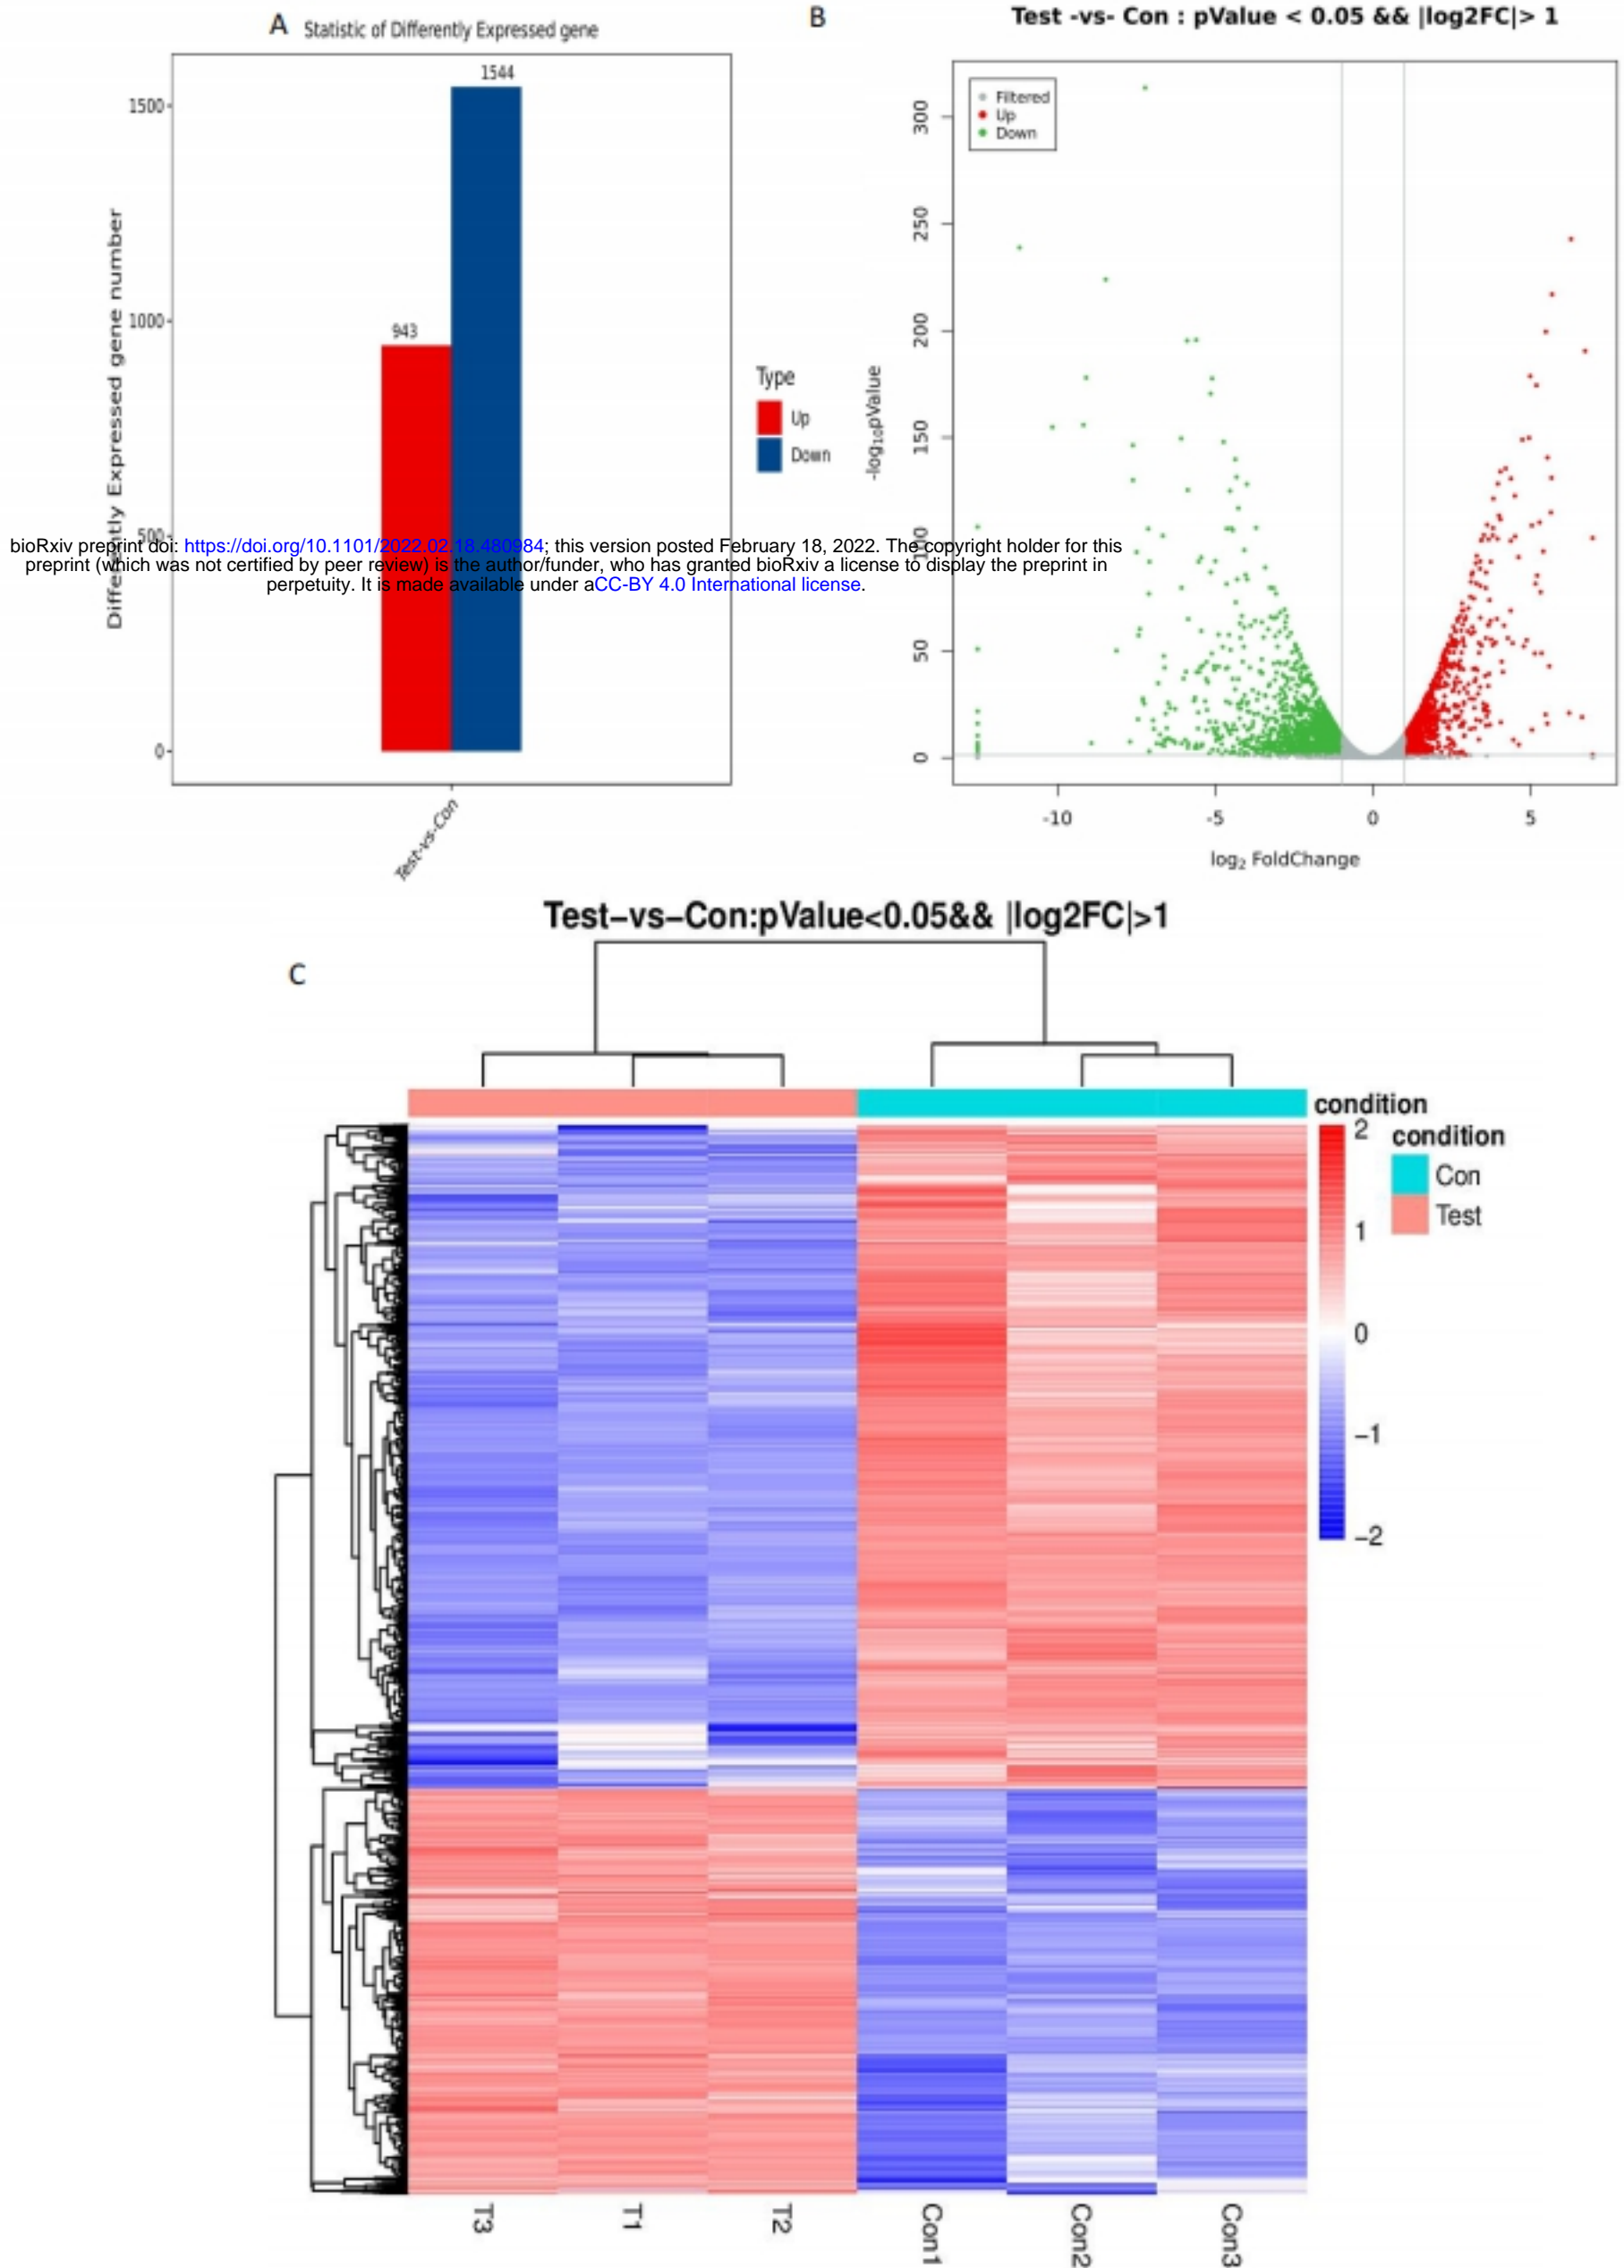

bioRxiv preprint doi: <https://doi.org/10.1101/2022.02.18.480984>; this version posted February 18, 2022. The copyright holder for this preprint (which was not certified by peer review) is the author/funder, who has granted bioRxiv a license to display the preprint in perpetuity. It is made available under aCC-BY 4.0 International license.

Fig3

### Gene Ontology Classification(Test-vs-Con)

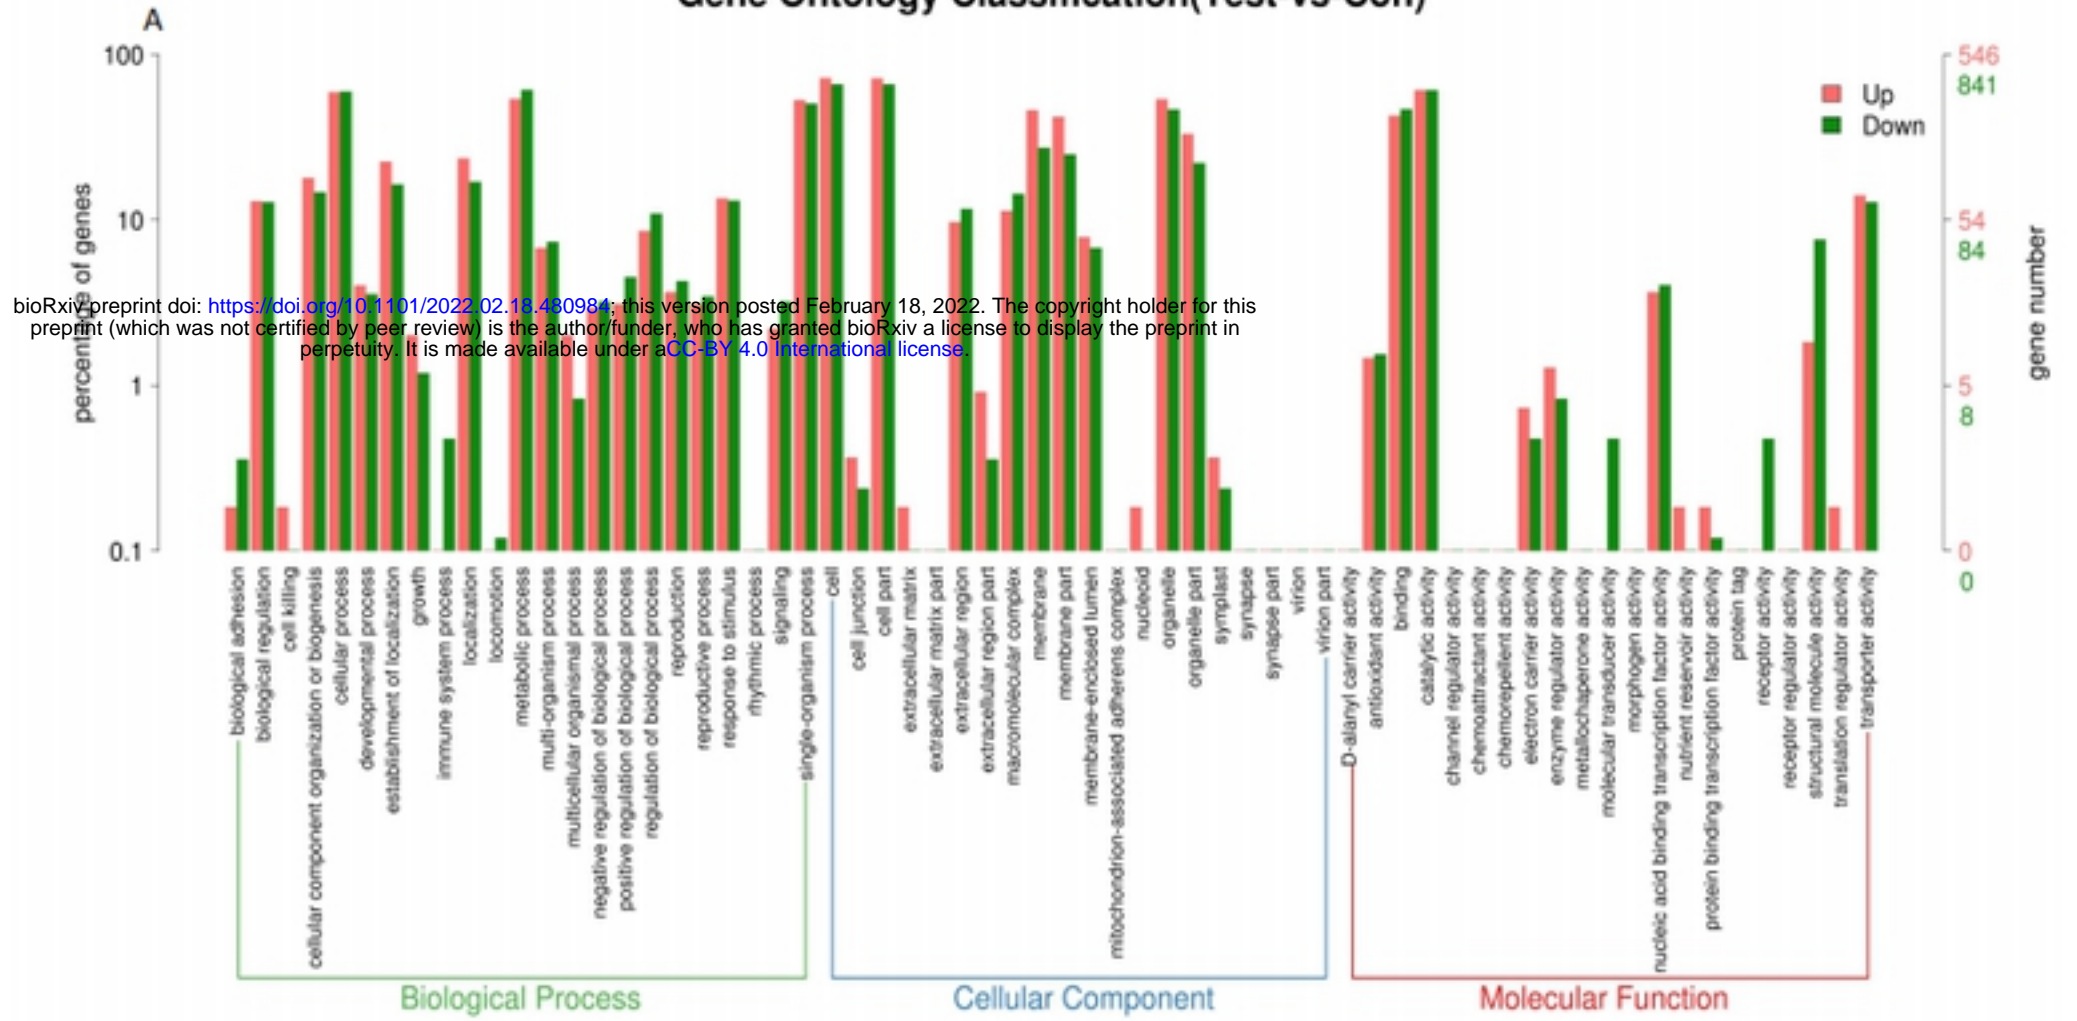

bioRxiv preprint doi: <https://doi.org/10.1101/2022.02.18.480984>; this version posted February 18, 2022. The copyright holder for this preprint (which was not certified by peer review) is the author/funder, who has granted bioRxiv a license to display the preprint in perpetuity. It is made available under aCC-BY 4.0 International license.

**B**

### KEGG Pathway Classification(Test-vs-Con)

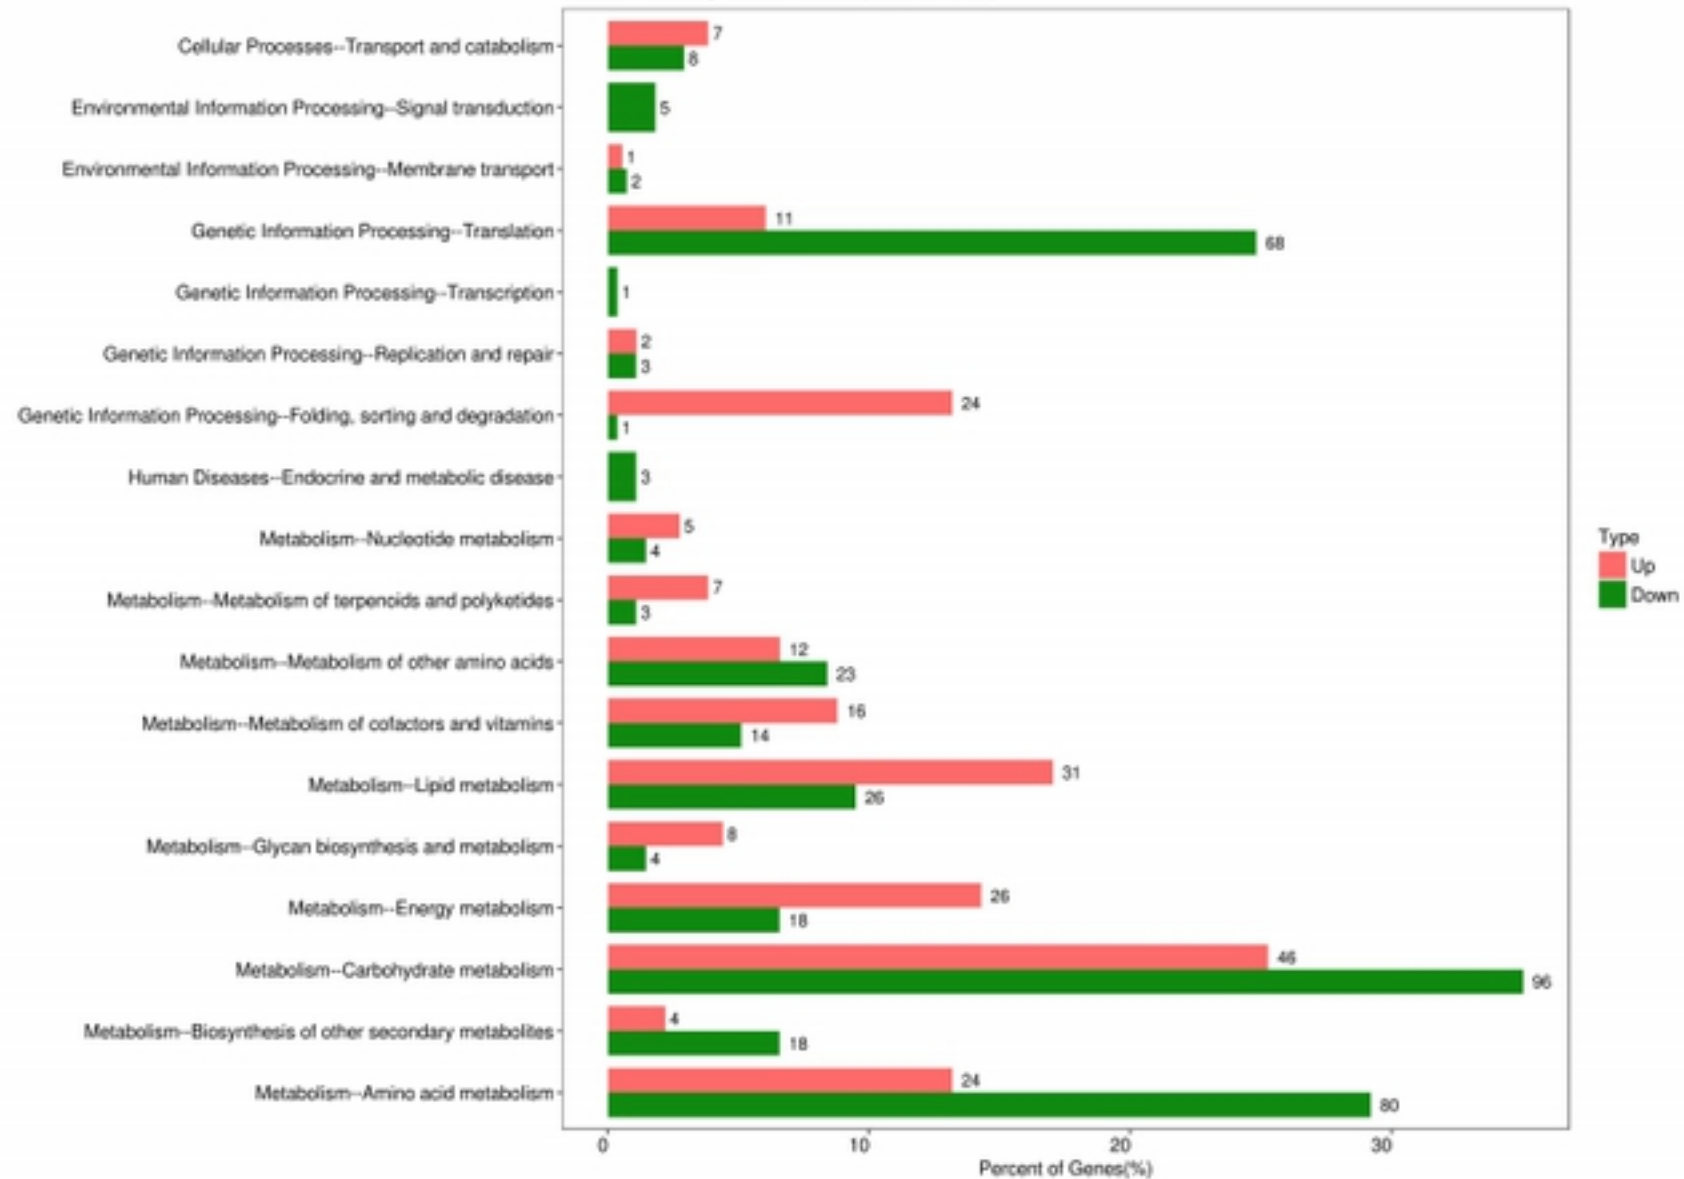

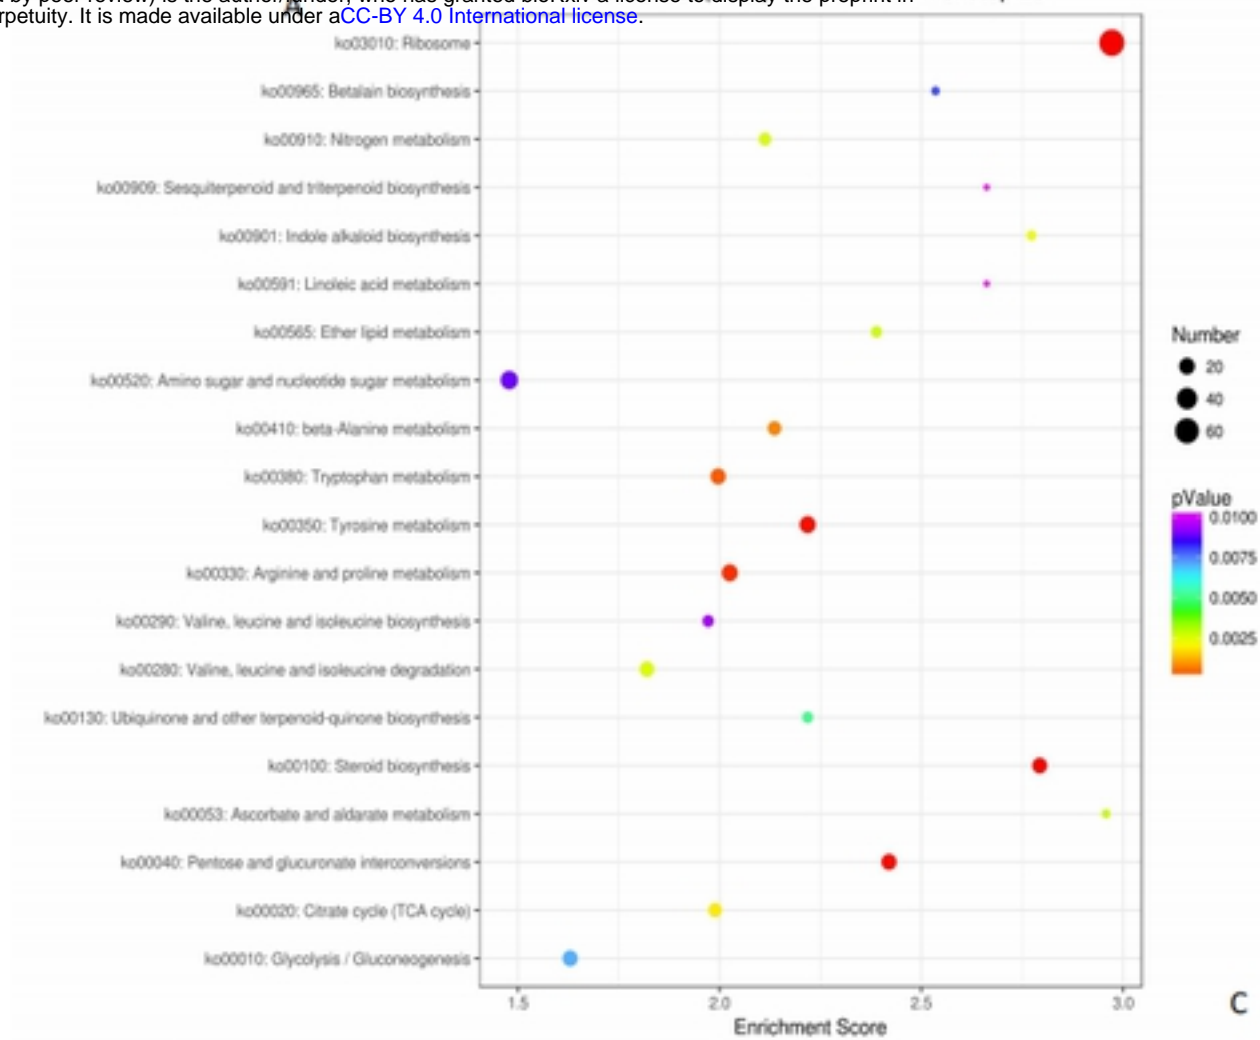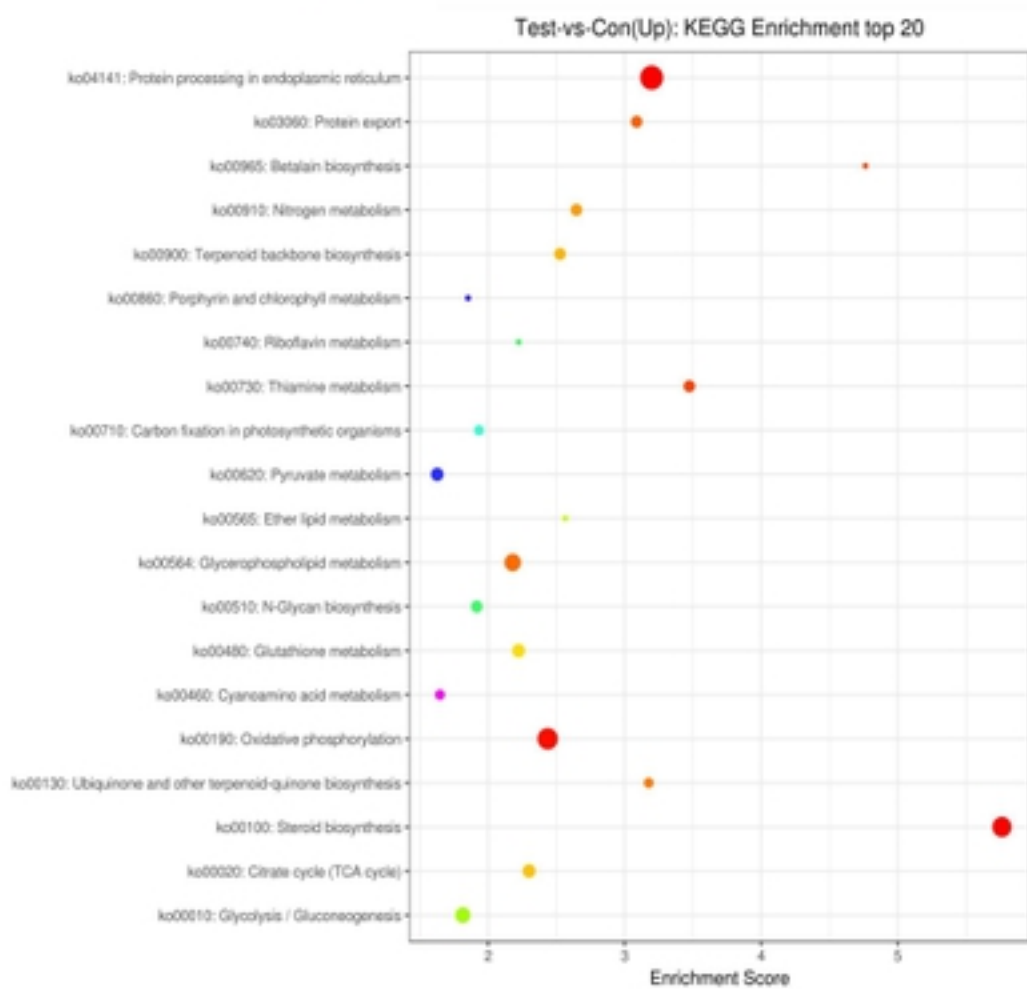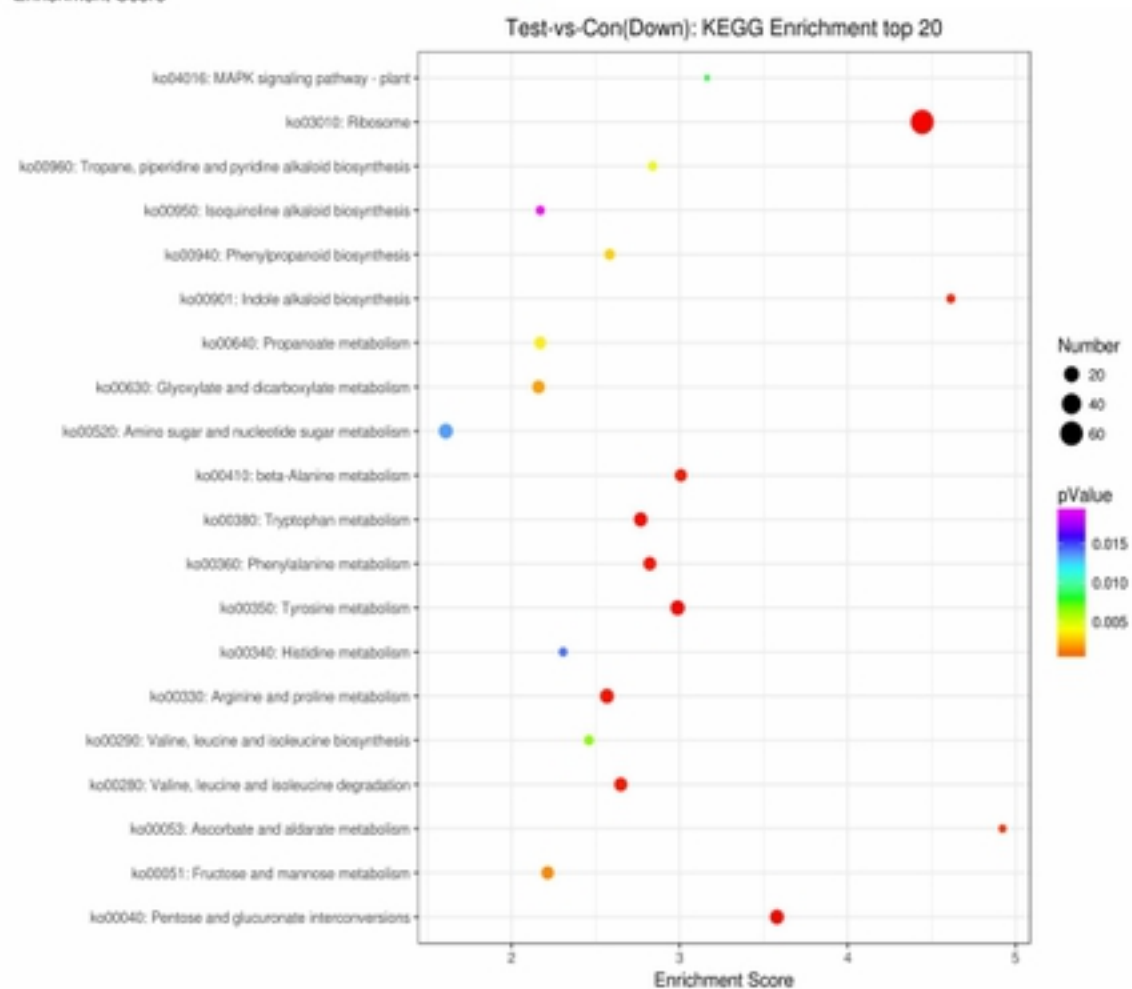

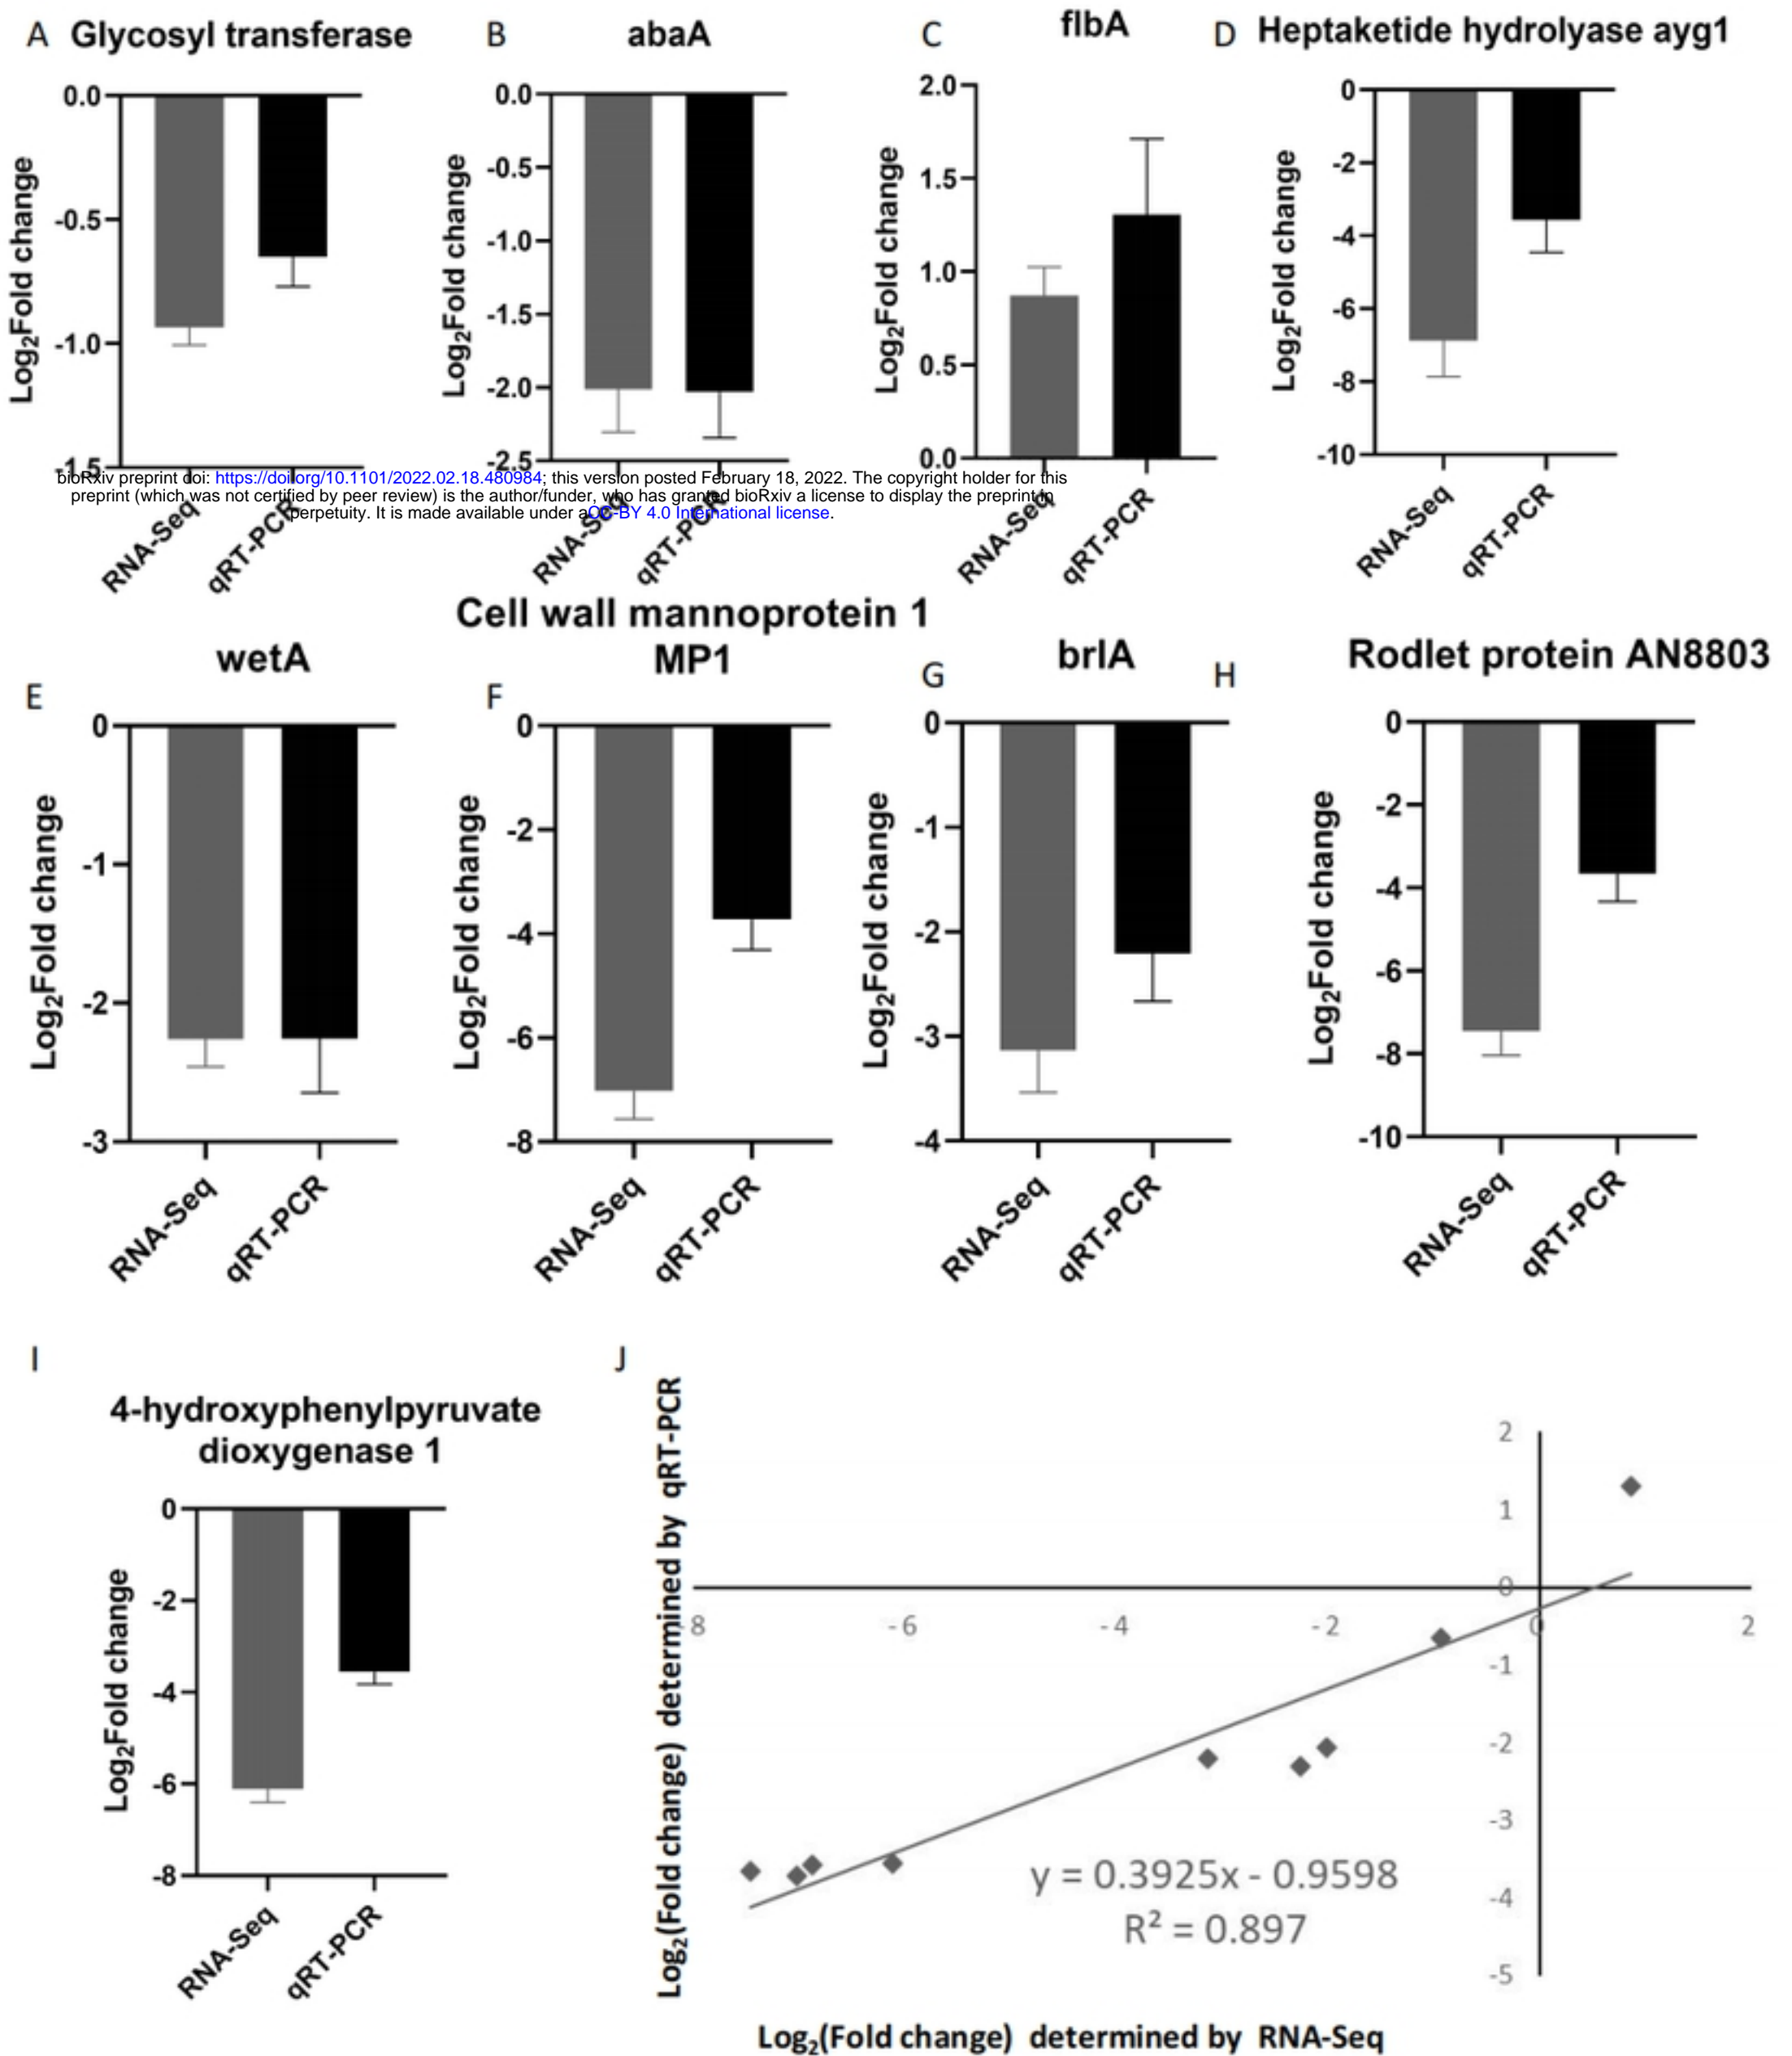

Fig6

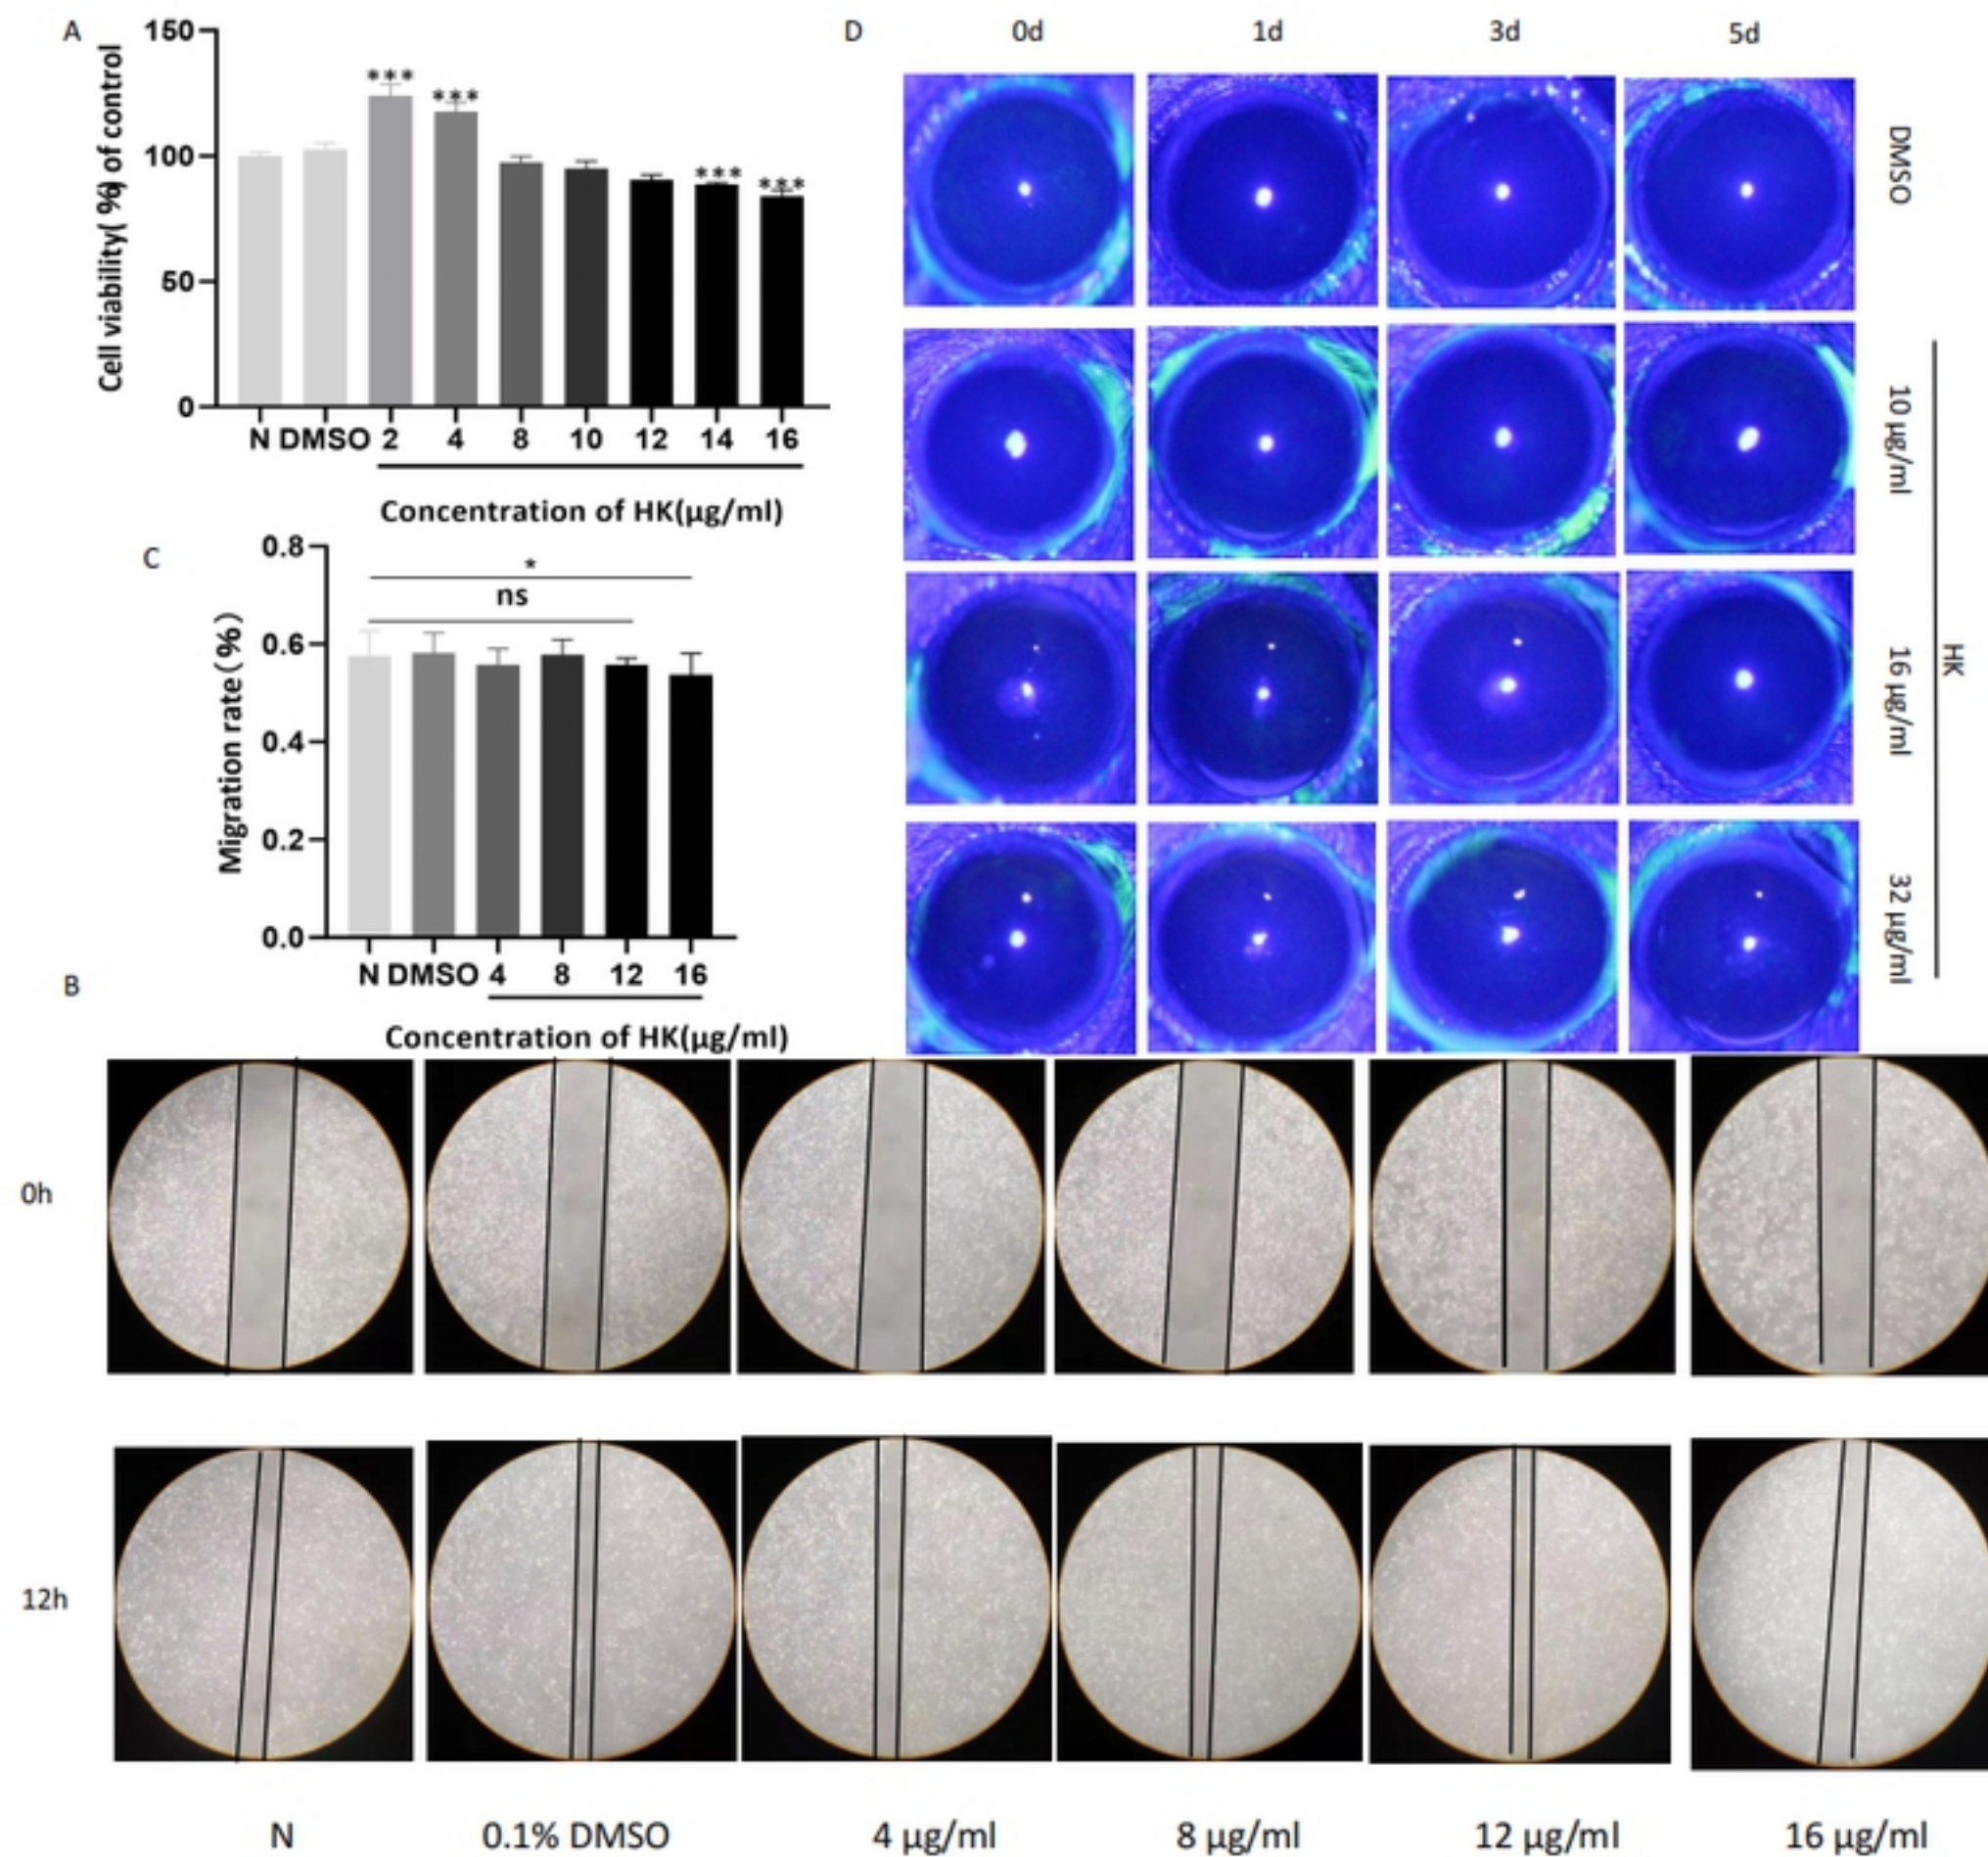



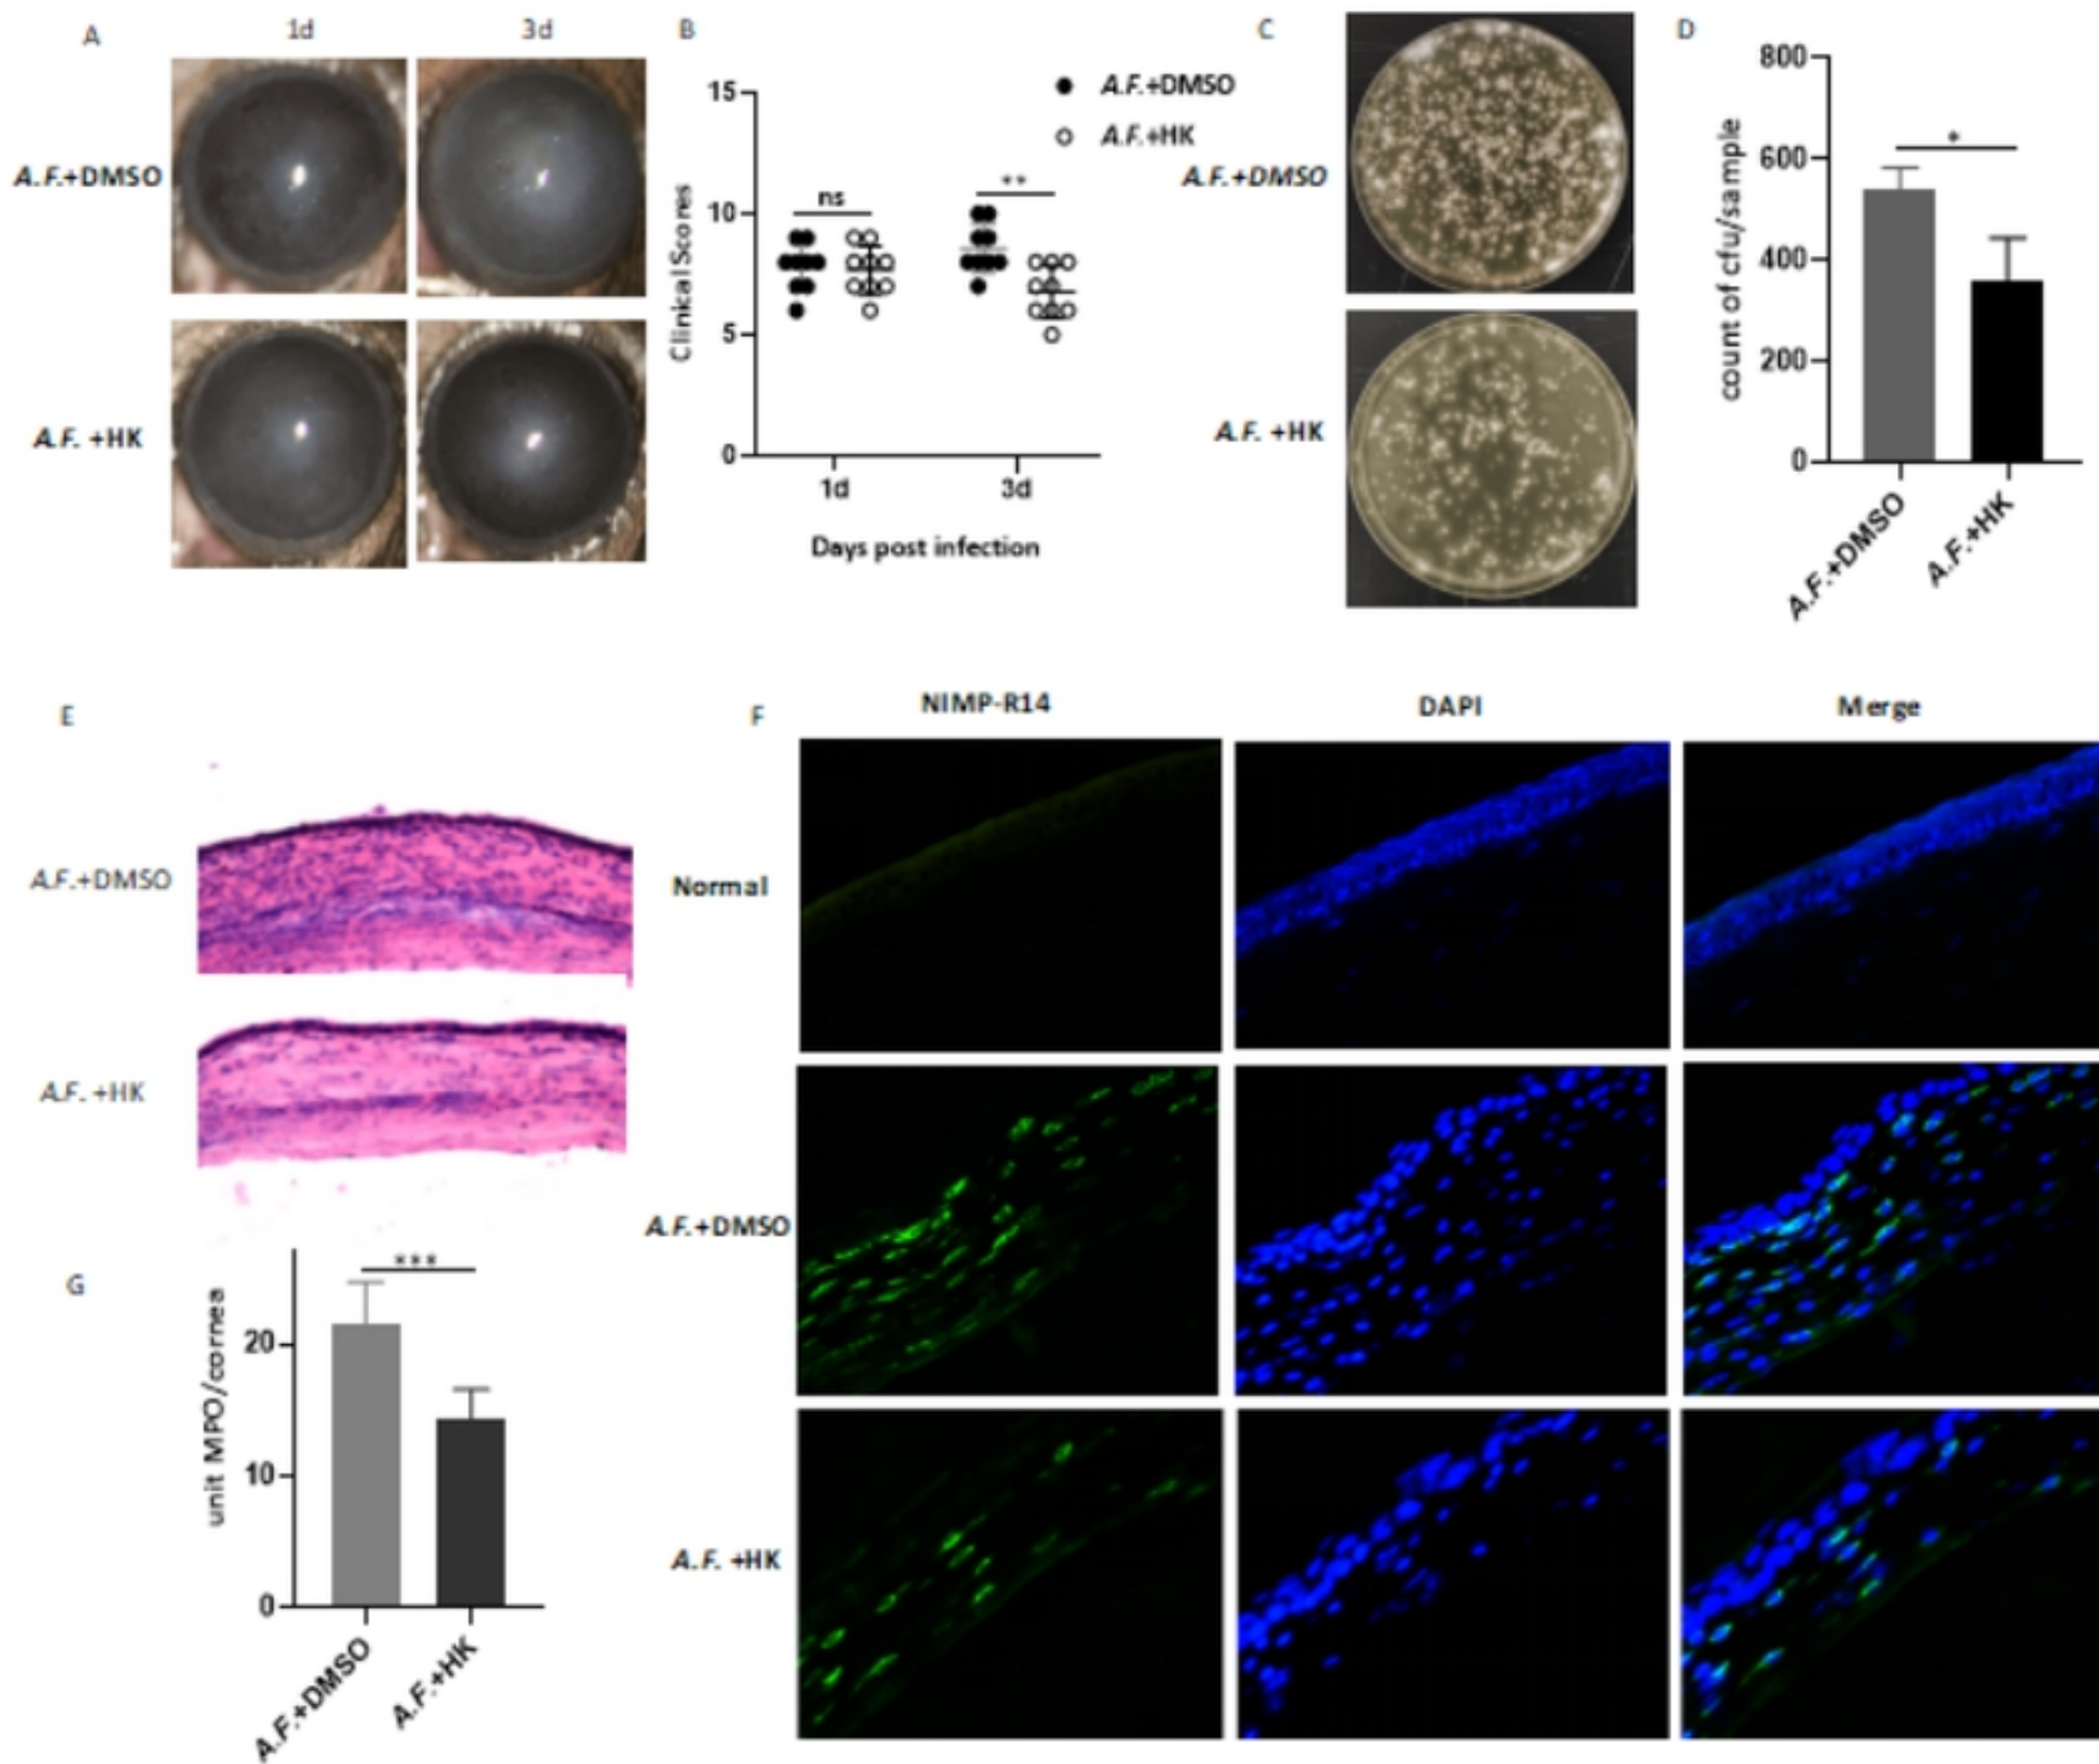

Fig8

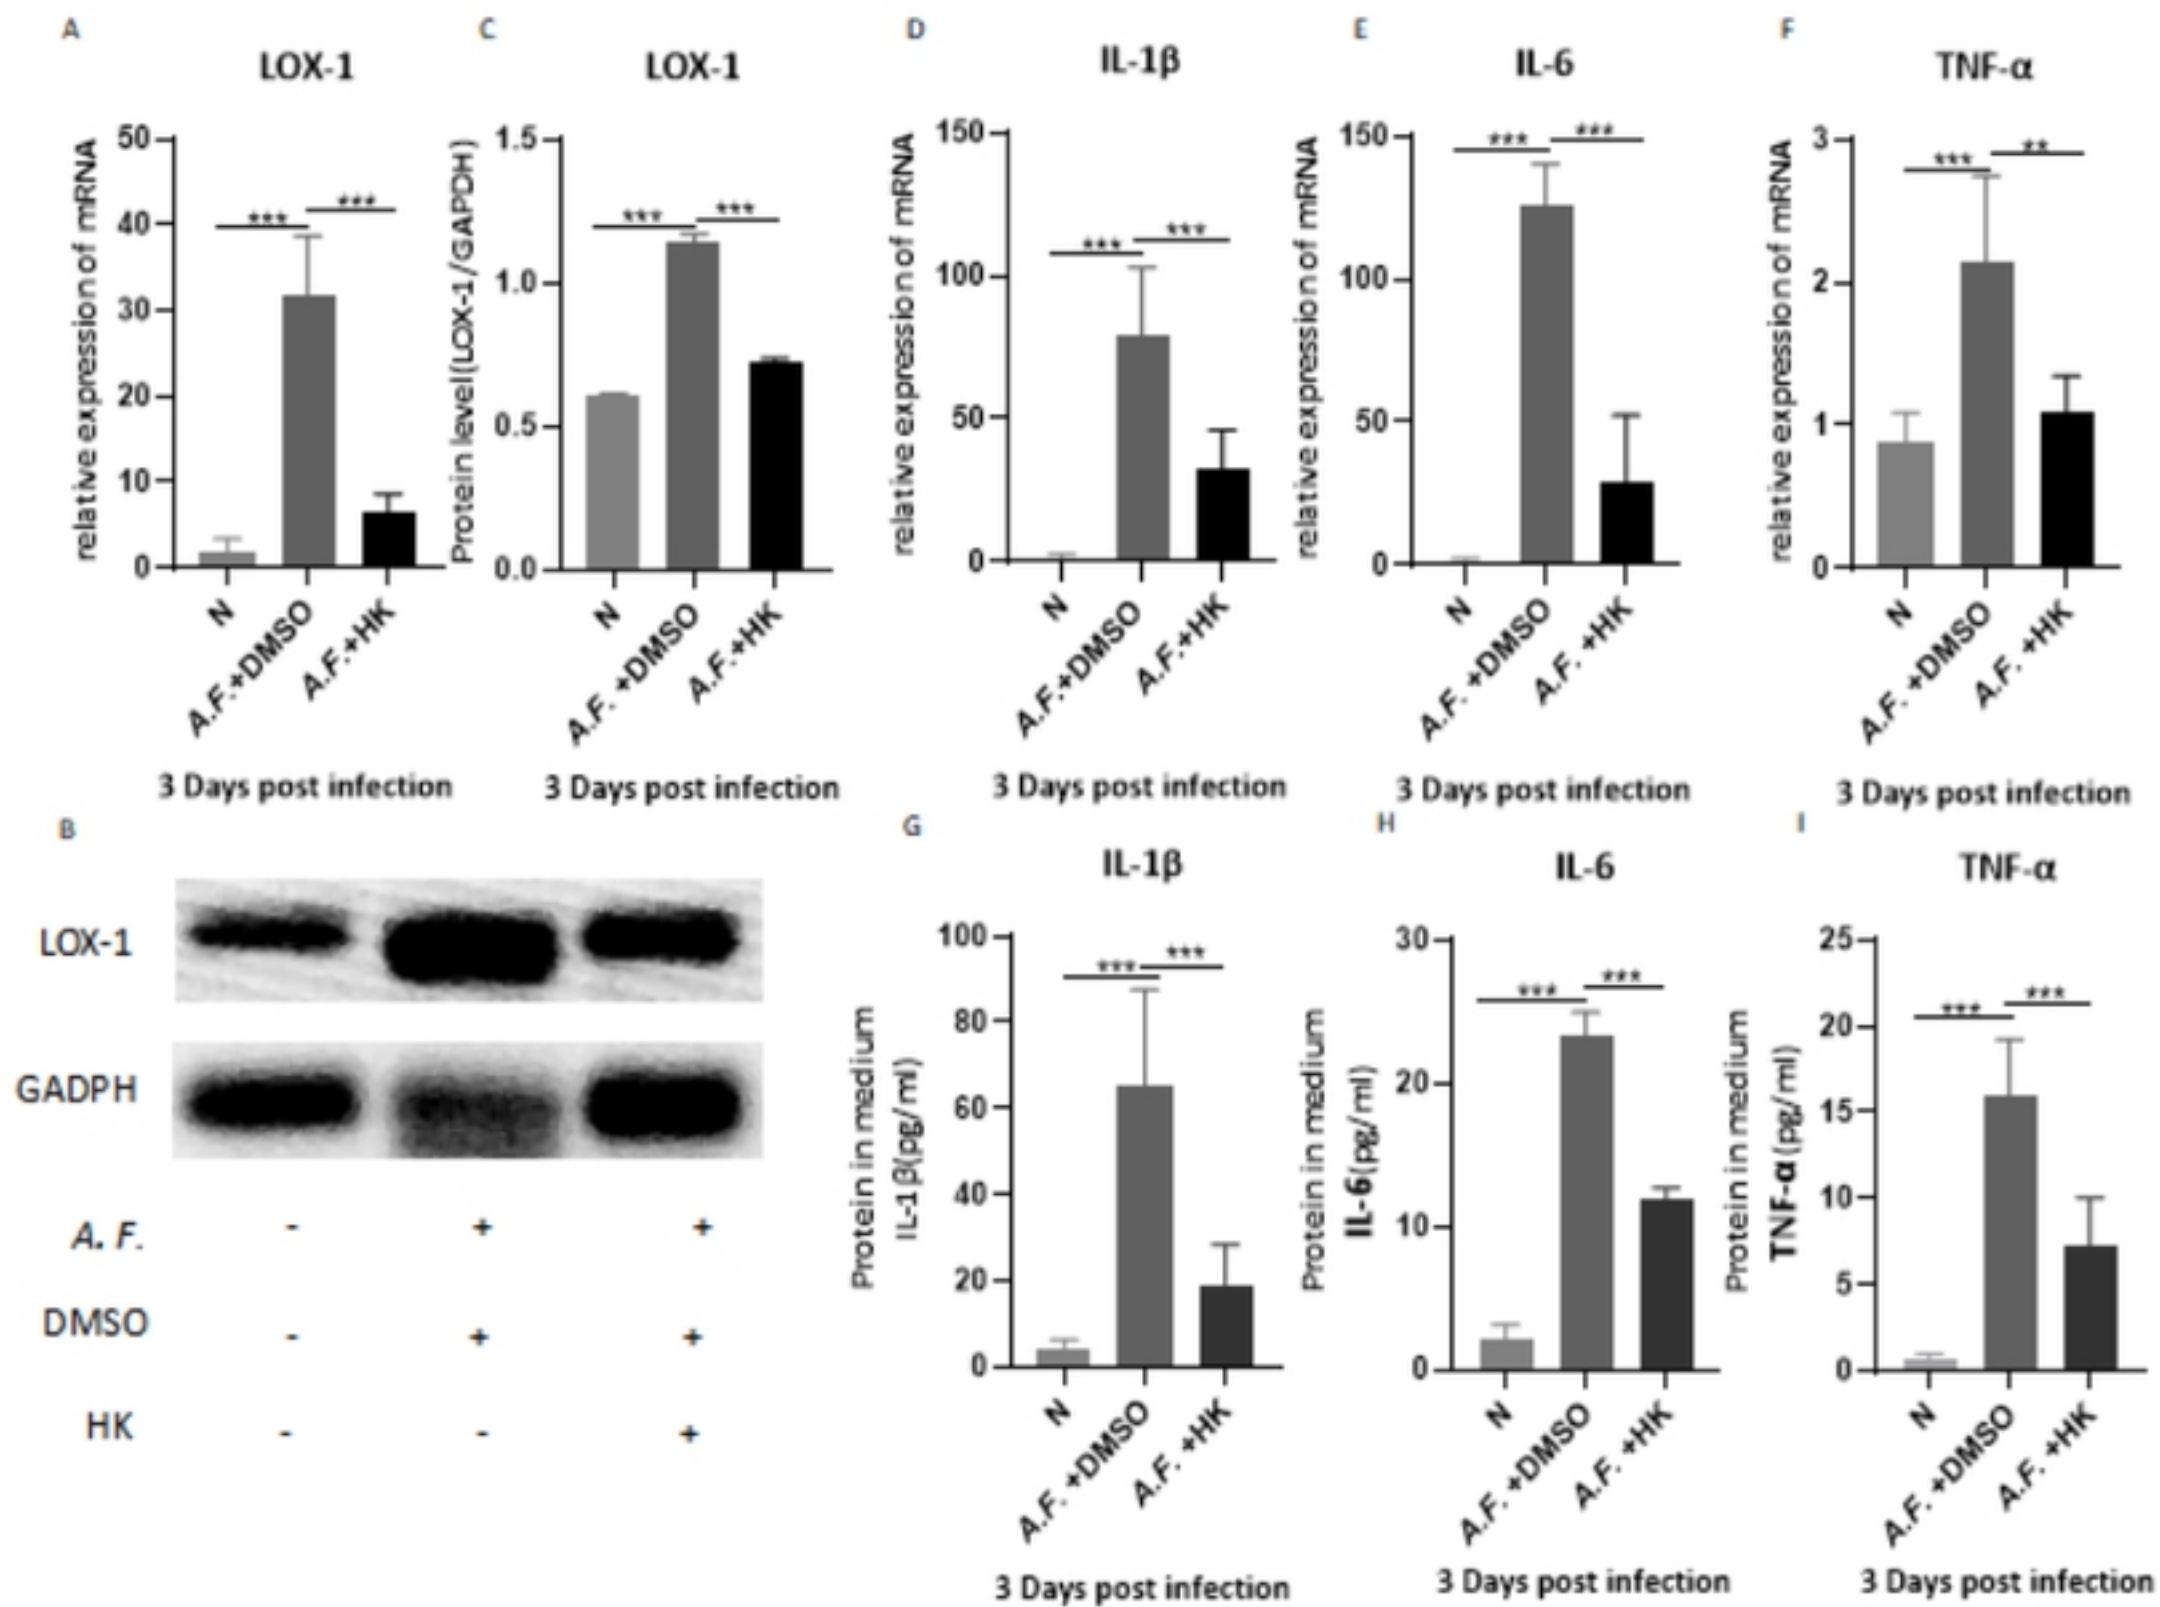

Fig9

---

| Sample | RawReads | RawBases | CleanReads | CleanBases | ValidBases | Q30    | GC     | Mapped/% |
|--------|----------|----------|------------|------------|------------|--------|--------|----------|
| Con1   | 48.34M   | 7.25G    | 47.54M     | 6.99G      | 96.38%     | 94.63% | 53.15% | 97.53    |
| Con2   | 49.96M   | 7.49G    | 49.47M     | 7.33G      | 97.83%     | 95.94% | 53.49% | 98.23    |
| Con3   | 42.23M   | 6.33G    | 41.78M     | 6.19G      | 97.70%     | 95.80% | 53.44% | 98.09    |
| T1     | 49.44M   | 7.42G    | 48.87M     | 7.25G      | 97.77%     | 95.80% | 53.72% | 98.35    |
| T2     | 43.18M   | 6.48G    | 42.68M     | 6.33G      | 97.74%     | 95.61% | 53.84% | 98.33    |
| T3     | 47.30M   | 7.10G    | 46.48M     | 6.87G      | 96.89%     | 95.05% | 53.81% | 98.10    |

---

Table1

| Pathway                        | Gene product                                                        | Log2FoldChange                          |
|--------------------------------|---------------------------------------------------------------------|-----------------------------------------|
| Starch and sucrose metabolism  | Endoglucanase-5 egl5                                                | 1.44                                    |
|                                | Beta-glucosidase 1B BGL1B                                           | 1.04                                    |
|                                | Probable glucan endo-1,3-beta-glucosidase eglC                      | 2.22                                    |
|                                | Alpha-amylase B                                                     | 1.45                                    |
|                                | Probable endo-beta-1,4-glucanase B                                  | 2.76                                    |
|                                | Glucan 1,3-beta-glucosidase                                         | 1.26                                    |
| Glycerophospholipid metabolism | Phospholipase D zeta 1 K20I9.1                                      | 2.23                                    |
|                                | Lysophospholipase                                                   | 2.55                                    |
|                                | Non-specific phospholipase C6 At3g48610                             | 2.60                                    |
| Steroid biosynthesis           | Delta(14)-sterol reductase                                          | 4.38                                    |
|                                | C-8 sterol isomerase 9G6.010                                        | 1.34                                    |
|                                | Processed sterol regulatory element-binding protein 1 SPBC19C2.09   | 1.93                                    |
|                                | Methylsterol monooxygenase                                          | 2.67                                    |
|                                | Translation initiation factor RLI1                                  | -2.06                                   |
| ribosome                       | Nucleolar pre-ribosomal-associated protein 2 J1622                  | -1.07                                   |
|                                | 40S ribosomal protein S20 SPCC576.09                                | -1.78                                   |
|                                | Cytoplasmic 60S subunit biogenesis factor REI1 homolog CTHT_0044240 | -1.01                                   |
|                                | Ribosome biogenesis protein tsr1 SPAC23H4.15                        | -1.22                                   |
|                                | Ribosome biogenesis in eukaryotes                                   | -2.47                                   |
|                                | 40S ribosomal protein S6-B SPAPB1E7.12                              | -1.19                                   |
|                                | GTP-binding nuclear protein GSP1/Ran CAGL0I00594g                   | -1.34                                   |
|                                | 20S-pre-rRNA D-site endonuclease nob1 SPAC1486.09                   | -1.11                                   |
|                                | Ribosome maturation protein SDO1 YLR022C                            | -1.36                                   |
|                                | Conidiophore development                                            | Conidiophore development regulator abaA |
| Conidiophore development       | Developmental regulatory protein wetA                               | -2.10                                   |
|                                | C2H2 type master regulator of conidiophore development brIA         | -2.94                                   |
|                                | Conidiophore development regulator abaB                             | -2.23                                   |

bioRxiv preprint doi: <https://doi.org/10.1101/2022.02.18.480984>; this version posted February 18, 2022. The copyright holder for this preprint (which was not certified by peer review) is the author/funder, who has granted bioRxiv a license to display the preprint in perpetuity. It is made available under aCC-BY 4.0 International license.

| Gene                                                        | GenBank no.    | Primer sequence (5' -3' )                            |
|-------------------------------------------------------------|----------------|------------------------------------------------------|
| Aspergillus fumigatus 18S rRNA                              | NW_020798050.1 | F:CTTAAATAGCCCGGTCCGCATT<br>R:CATCACAGACCTGTTATTGCCG |
| Aspergillus fumigatus Glycosyl transferase                  | XM_749734.1    | F:GGCGTCTACTTGGGCTCTTT<br>R:AGAAACTGCTTCCTCTCGGC     |
| Aspergillus fumigatus AbaA                                  | NC_007194.1    | F:ACTCTGTCAGCAAAGCCGAA<br>R:AAGGTTATGGTGCACAGGG      |
| Aspergillus fumigatus flbA                                  | NC_007195.1    | F:CGTGGACTGGCTGATGGATT<br>R:ACTTGGATGGCTGGAAGACG     |
| Aspergillus fumigatus Heptaketide hydrolyase ayg1           | NC_007195.1    | F:TCGCCTGATAGACTGTGGGA<br>R:CCAACCATTCCGGGTCAAGA     |
| Aspergillus fumigatus wetA                                  | NC_007197.1    | F:CTGCCAGCCAATGCAGTTTT<br>R:TTTCGGAGTGACCAGAGCAC     |
| Aspergillus fumigatus Cell wall mannoprotein 1 MP1          | NC_007197.1    | F:TGTCAGCACCATCAACTCCG<br>R:GGCGACGAACTTGTCTTCT      |
| Aspergillus fumigatus brIA                                  | NC_007194.1    | F:ACACCTACCCCTACGAGCAT<br>R:TGTCGATCCGGTACCTCTGT     |
| Aspergillus fumigatus Rodlet protein AN8803                 | NC_007194.1    | F:GACGACCTCCTCAACAAGCA<br>R:TAGAGTCGAGAGCAACGCAG     |
| Aspergillus fumigatus 4-hydroxyphenylpyruvate dioxygenase 1 | NC_007195.1    | F:AAGGGCAAGAAGCAATCCCA<br>R:GAGGTTGGTAATGTCGCGGA     |

Visual Scoring System for Murine Fungal Keratitis

|                            | Grade 1                                                  | Grade 2                                              | Grade 3                                                         | Grade 4                      |
|----------------------------|----------------------------------------------------------|------------------------------------------------------|-----------------------------------------------------------------|------------------------------|
| Area of corneal opacity    | 1~25%                                                    | 26~50%                                               | 51~75%                                                          | 76~100%                      |
| Density of corneal opacity | Slight cloudiness, outline of iris and pupil discernable | Cloudy, but outline of iris and pupil remain visible | Cloudy, opacity not uniform                                     | Uniform opacity              |
| Surface regularity         | Slight surface irregularity                              | Rough surface, some swelling                         | Significant swelling, crater or serious descemetocele formation | Perforation or descemetocele |

the score is the sum of three terms

| Gene                 | GenBank no.    | Primer sequence (5' -3' )                               |
|----------------------|----------------|---------------------------------------------------------|
| Mouse $\beta$ -actin | NM_007393.5    | F:GATTACTGCTCTGGCTCCTAGC<br>R:GACTCATCGTACTCCTGCTTGC    |
| Mouse IL-1 $\beta$   | NM_008361.4    | F:CGCAGCAGCACATCAACAAGAGC<br>R:TGTCCTCATCCTGGAAGGTCCACG |
| Mouse IL-6           | NM_001314054.1 | F:TGATGGATGCTACCAAAGTGG<br>R:TGTGACTCCAGCTTATCTCTTGG    |
| Mouse TNF- $\alpha$  | NM_013693.3    | F:ACCCTCACACTCAGATCATCTT<br>R:GGTTGTCTTTGAGATCCATGC     |
| Mouse LOX-1          | NC_007195.1    | F:TCGCCTGATAGACTGTGGGA<br>R:CCAACCATTCCGGGTCAAGA        |
